# Supplementary material
Source: PubMed Central journal article supplement (PMC3073088)

## Enantioselective Total Synthesis and Confirmation of the Absolute and Relative Stereochemistry of Streptorubin B

Dennis X. Hu, Michael D. Clift, Kiel E. Lazarski and Regan J. Thomson\*

Department of Chemistry, Northwestern University, Evanston, Illinois, 60208  
r-thomson@northwestern.edu

### Supporting Information

|    |                                                             |         |
|----|-------------------------------------------------------------|---------|
| 1. | Supplemental References                                     |         |
| 2. | General Methods                                             | S1-S2   |
| 3. | Experimental Procedures: Synthesis of Streptorubin B        | S2-S7   |
| 4. | Experimental Procedures: Exploration of Pyrrole Atropisomer | S8-S10  |
| 5. | Determination of Barrier to Atropisomerisation              | S11     |
| 6. | CD Data                                                     | S12-S13 |
| 7. | <sup>1</sup> H and <sup>13</sup> C-NMR Spectra              | S14-S57 |

#### Part 1: Supplemental References

The complete reference for ref. 2b within the manuscript is as follows: Nguyen, M.; Marcellus, R. C.; Roulston, A.; Watson, M.; Serfass, L.; Murthy Madiraju, S. R.; Goulet, D.; Viallet, J.; Be'lec, L.; Billot, X.; Acoca, S.; Purisima, E.; Wiegman, A.; Cluse, L.; Johnstone, R. W.; Beauparlant, P.; Shore, G. C. *Proc. Natl. Acad. Sci. U. S. A.*, **2007**, *104*, 19512–19517.

#### Part 2: General Methods

All reactions were carried out under a nitrogen atmosphere in flame-dried glassware with magnetic stirring unless otherwise stated. THF and CH<sub>2</sub>Cl<sub>2</sub> were purified by passage through a bed of activated alumina.<sup>1</sup> Reagents were purified<sup>2</sup> prior to use unless otherwise stated. Purification of reaction products was carried out by flash chromatography using EM Reagent silica gel 60 (230-400 mesh). Analytical thin layer chromatography was performed on EM Reagent 0.25 mm silica gel 60-F plates. Visualization was accomplished with UV light and anisaldehyde or potassium permanganate followed by heating. Film infrared spectra were recorded using a BioRad Excalibur and a BioRad FTS-60. Germanium ATR infrared spectra were recorded using a Bruker Tensor 37. <sup>1</sup>H-NMR spectra were recorded on a Bruker Advance III 500 (500 MHz), Varian Inova 500 (500 MHz), or Inova 400 (400 MHz) spectrometer and are

---

1. Pangborn, A. B.; Giardello, M. A.; Grubbs, R. H.; Rosen, R. K.; Timmers, F. J. *Organometal.* **1996**, *15*, 1518-1520.

2. Perrin, D. D.; Armarego, W. L. *Purification of Laboratory Chemicals*; 3rd Ed., Pergamon Press, Oxford. 1988

## Supporting Information

reported in ppm using solvent as an internal standard (CDCl<sub>3</sub> at 7.26 ppm) or tetramethylsilane (0.00 ppm). Two-dimensional NMR experiments were run on a Bruker Advance III 500 (500 MHz). Data are reported as (app = apparent, obs = obscured, s = singlet, d = doublet, t = triplet, q = quartet, p = pentet, h = hextet, sep = septet, o = octet, m = multiplet, b = broad; integration; coupling constant(s) in Hz. Proton-decoupled <sup>13</sup>C-NMR spectra were recorded on a Bruker Advance III 500 (125 MHz), Varian Inova 500 (125 MHz), or Inova 400 (100 MHz) spectrometer and are reported in ppm using solvent as an internal standard (CDCl<sub>3</sub> at 77.00 ppm). Mass spectra data were obtained on an Agilent 6210 Time-of-Flight LC/MS and a Thermo Finnegan Mat 900 XL High Resolution Magnetic Sector. X-ray data were collected using a Bruker APEX II detector and processed using an APEX2 from Bruker. Optical rotations were recorded with a Perkin Elmer 341 polarimeter at 589 nm (Na/Hal) at 20°C. Circular dichroism spectra were recorded with a JASCO J-815 circular dichroism spectrophotometer at ambient temperature in CHCl<sub>3</sub>, using a 2 mm thick cuvette.

### Part 3: Experimental Procedures: Synthesis of Streptorubin B

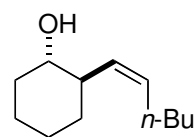

**(1S,2R)-2-((1Z)-1-hexen-1-yl)-cyclohexanol (14):** To a solution of heptanedial (2.6 g, 20 mmol) in dichloromethane (202 mL) was added (*S*)-proline (232 mg, 2 mmol) at room temperature. The heterogenous mixture was stirred for 12 hours, after which the solution became clear and homogenous. To a suspension of pentyltriphenylphosphonium bromide (10.9 g, 26.3 mmol) in THF (202 mL in a separate flask) at 0 °C was added sodium hexamethyldisilazane (26 mL, 26.3 mmol, 1 M in THF), upon which the solution turned bright orange. The ylide solution was allowed to stir for 1h 20 min prior to addition of aldehyde solution via cannula at 0 °C (total aldol reaction time = 13 h 30 min), upon which the solution turned cloudy and white. After 1h, the reaction mixture was quenched with saturated NH<sub>4</sub>Cl (200 mL), and the organic layer separated. The aqueous/halogenated layers were extracted with Et<sub>2</sub>O (3 x 200 mL), and the combined organic layers were dried (MgSO<sub>4</sub>) and concentrated under reduced pressure. The residue was purified by flash column chromatography (33% Et<sub>2</sub>O in hexanes, silica gel) to afford a 10:1:1 mixture of the title compound, the *syn*-diastereomer, and the *E*-isomer, respectively (2.54 g, 69%). When desired, the *syn*-diastereomer was removed by iterative column chromatography (3% MeOH in hexanes, silica gel) to afford the title compound as a 10:1 mixture of *Z* and *E* isomers: **IR** (neat) 3430, 2928, 2856, 1462, 1076 cm<sup>-1</sup>; **<sup>1</sup>H NMR** (500 MHz, CDCl<sub>3</sub>) 5.58 (dt, 1H, *J* = 10.9, 7.4 Hz), 5.16 (dd, 1H, *J* = 10.9, 10.6 Hz), 3.20 (m, 1H), 2.23 (dddd, 1H, *J* = 10.6 Hz, 10.6 Hz, 9.9 Hz, 3.4 Hz), 2.10 (m, 2H), 2.03 (m, 1H), 1.83 (s, 1H), 1.77 (bm, 1H), 1.64 (bt, 2H, *J* = 10.6, 10.6 Hz), 1.30 (m, 7H), 1.11 (m, 1H), 0.89 (t, 3H, *J* = 6.3 Hz); **<sup>13</sup>C NMR** (125 MHz, CDCl<sub>3</sub>) 133.4, 131.5, 73.9, 44.9, 33.5, 32.1, 31.4, 27.6, 25.3, 24.9, 22.4, 14.0; **HRMS** (EI): Exact mass calc'd for C<sub>12</sub>H<sub>22</sub>O [M<sup>+</sup>], 182.1671. Found 182.1665. [α]<sub>D</sub> = +38.2 (c = 2.07 g/100 mL, CHCl<sub>3</sub>).

To determine the enantioselectivity of the aldol-Wittig reaction:

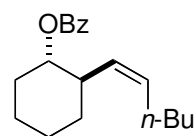

**(1S,2R)-2-((1Z)-1-hexen-1-yl)-cyclohexanyl-benzoate:** To a stirring solution of **14** (40.0 mg, 0.22 mmol) in DCM (2.2 mL) were added NEt<sub>3</sub> (91 μL, 0.66 mmol), DMAP (3 mg, 0.02 mmol), and benzoyl chloride (77 μL, 0.66 mmol). The solution was stirred for 60 h before being diluted in DCM (10 mL) and poured into H<sub>2</sub>O (10 mL). The halogenated layer was washed with sat. NaHCO<sub>3</sub> (10 mL), dried

(MgSO<sub>4</sub>), and concentrated in vacuo. The residue was purified via flash chromatography (10% EtOAc in hexanes, silica gel) to afford the title compound as a 10:1 mixture of Z and E isomers (41 mg, 69%): **IR** (neat) 2931, 2857, 1714, 1271 cm<sup>-1</sup>; **<sup>1</sup>H NMR** (500 MHz, CDCl<sub>3</sub>) 8.00 (dd, 2H, *J* = 8.2, 2.2 Hz), 7.53 (dd, 1H, *J* = 8.2, 7.7 Hz), 7.41 (dd, 2H, 8.2, 7.7 Hz), 5.32 (dt, 1H, *J* = 10.9, 7.0 Hz), 5.19 (dd, 1H, *J* = 10.9, 9.6 Hz), 4.83 (ddd, 1H, 10.7, 10.3, 4.2 Hz), 2.60 (dddd, 1H, 10.3, 10.2, 9.73, 4.0 Hz), 2.07 (m, 3H), 1.83 (m, 1H), 1.73 (m, 2H), 1.44 (m, 2H), 1.27 (m, 6H), 0.85 (t, 3H, *J* = 7.0 Hz); **<sup>13</sup>C NMR** (125 MHz, CDCl<sub>3</sub>) 166.1, 132.6, 131.4, 131.1, 130.9, 129.6, 128.2, 76.5, 41.6, 32.0, 31.9, 31.6, 27.4, 24.9, 24.6, 22.4, 14.0; **HRMS** (ESI): Exact mass calc'd for C<sub>19</sub>H<sub>27</sub>O<sub>2</sub> [M+H<sup>+</sup>], 287.2006. Found 287.2005. [α]<sub>D</sub> = +11.8 (c = 0.61 g/100 mL, CHCl<sub>3</sub>)

The UV-active aromatic ester was used to determine the enantioselectivity of the aldol-Wittig reaction sequence by comparison to the racemic material. Enantioselectivity (97.5:2.5 er) was determined by chiral HPLC analysis: Chiraldex OD-H column (0.46 cm x 25 cm), flow rate of 1.0 mL/min, 0.5% isopropanol in hexanes. Retention times: 7.67 min (+)/10.40 min (-).

#### Mosher Ester Analysis of (1*S*,2*R*)-2-((1*Z*)-1-hexen-1-yl)-cyclohexanol (**14**)

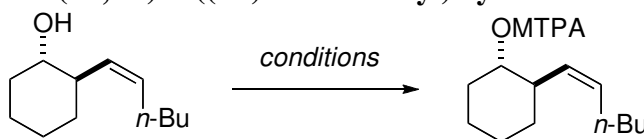

**General Procedure for the Preparation of Mosher Esters:** To a solution of alcohol **14** (9.4 mg, 0.052 mmol) in dry DCM (0.5 mL) was added DMAP (3.0 mg, 0.025 mmol), *i*Pr<sub>2</sub>NEt (14 μL, 0.10 mmol), and (*R*)-(-)-α-methoxy-α-(trifluoromethyl)phenylacetyl chloride (14 μL, 0.08 mmol). The solution was allowed to stir at room temperature for 12 h before being diluted with Et<sub>2</sub>O (3 mL) and quenched with H<sub>2</sub>O (1 mL). The aqueous layer was extracted twice with Et<sub>2</sub>O (3 mL), and the combined organic layers were dried (Na<sub>2</sub>SO<sub>4</sub>) and concentrated in vacuo. Flash chromatography (20% ethyl acetate in hexanes, silica gel) afforded the (*S*)-Mosher's ester (21 mg, 98%). The same procedure, using (*S*)-(+)-α-methoxy-α-(trifluoromethyl)phenylacetyl chloride, provided the (*R*)-Mosher's ester.

**Table S.1** – Mosher-Ester Analysis of Secondary Alcohol

| H                              | δ <sub>S</sub> (ppm) | δ <sub>R</sub> (ppm) | Δδ = δ <sub>S</sub> - δ <sub>R</sub> |
|--------------------------------|----------------------|----------------------|--------------------------------------|
| C <sup>1</sup> -H <sub>2</sub> | 2.011, 1.903         | 1.905, 1.655         | +0.106, +0.248                       |
| C <sup>2</sup> -H              | 5.435                | 5.228                | +0.207                               |
| C <sup>3</sup> -H              | 5.234                | 5.115                | +0.119                               |
| C <sup>4</sup> -H              | 2.543                | 2.496                | +0.047                               |
| C <sup>9</sup> -H <sub>2</sub> | 1.697, 1.219         | 1.672, 1.216         | +0.025, +0.003                       |
| C <sup>6</sup> -H <sub>2</sub> | 2.033, 1.322         | 2.076, 1.495         | -0.043, -0.173                       |
| C <sup>7</sup> -H <sub>2</sub> | 1.771, 1.327         | 1.811, 1.392         | -0.040, -0.065                       |

Based on the model proposed by Mosher,<sup>3</sup> the secondary alcohol was assigned the (1*S*,2*R*) absolute configuration.

3. Dale, J. A.; Mosher, H. S. *J. Am. Chem. Soc.* **1973**, *95*, 512–519.

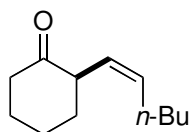

**(R)-2-((1Z)-1-hexen-1-yl)-cyclohexanone (S1):** To a solution of freshly distilled oxalyl chloride (199  $\mu\text{L}$ , 2.3 mmol) in DCM (8.8 mL) at  $-78^\circ\text{C}$  was added dropwise DMSO (192  $\mu\text{L}$ , 2.7 mmol). The solution was stirred for 5 minutes, after which a solution of secondary alcohol **14** (352 mg, 1.93 mmol) in DCM (5.8 mL) was added. The solution was stirred for 20 minutes, followed by the dropwise addition of  $i\text{Pr}_2\text{NEt}$  (1.66 mL, 9.65 mmol). The solution was stirred for 10 minutes before being warmed to  $0^\circ\text{C}$  in an ice bath. The solution was further stirred at  $0^\circ\text{C}$  for 30 minutes, then poured into  $\text{H}_2\text{O}$  (30 mL). The organic phase was collected, and the aqueous layer back-extracted with DCM (20 mL). The combined organic layers were dried ( $\text{Na}_2\text{SO}_4$ ), filtered, and concentrated in vacuo. Purification by flash chromatography (10% EtOAc in hexanes, silica gel) afforded the title compound (335 mg, 96%): **IR** (neat) 2958, 2860, 1712, 1126  $\text{cm}^{-1}$ ;  **$^1\text{H}$  NMR** (500 MHz,  $\text{CDCl}_3$ ) 5.52 (m, 2H), 3.27 (ddd, 1H,  $J = 10.4, 6.9, 6.9$  Hz), 2.45 (ddd, 1H,  $J = 13.4, 11.6, 4.9$  Hz), 2.31 (m, 1H), 2.00 (m, 4H), 1.87 (m, 1H), 1.73 (m, 2H), 1.61 (m, 2H), 1.31 (m, 4H), 0.88 (t, 3H,  $J = 6.7$  Hz);  **$^{13}\text{C}$  NMR** (125 MHz,  $\text{CDCl}_3$ ) 211.5, 132.3, 126.4, 49.4, 41.7, 34.9, 31.7, 27.7, 27.3, 24.4, 22.3, 14.0; **HRMS** (ESI): Exact mass calc'd for  $\text{C}_{12}\text{H}_{21}\text{O}$  [ $\text{M}+\text{H}^+$ ], 181.1587. Found 181.1585.  $[\alpha]_{\text{D}} = +3.2$  ( $c = 2.64$  g/100 mL,  $\text{CHCl}_3$ ).

**(E)-1-benzyloxy-3-iodo-2-propene (S2):**<sup>4</sup> To  $\text{ZrCp}_2\text{Cl}_2$  (5.4 g, 19 mmol) under  $\text{N}_2$  was added THF (32 mL). The solution was cooled to  $0^\circ\text{C}$  and stirred vigorously as a solution of DIBAL (18.7 mL, 1 M in hexanes) was added slowly. The solution was vigorously stirred for 30 minutes at  $0^\circ\text{C}$  before addition of benzyl propargyl ether (1.81 g, 12.4 mmol) in THF (6.4 mL). The reaction was warmed to room temperature, and allowed to stir for 3 hours before being cooled to  $-78^\circ\text{C}$ . A homogenous solution of  $\text{I}_2$  (5.3 g, 21 mmol) in THF (24 mL) was then added to the black solution, and after 30 minutes at  $-78^\circ\text{C}$ , the solution was raised to  $0^\circ\text{C}$ , quenched with 1 M aq. HCl (40 mL), extracted with  $\text{Et}_2\text{O}$  (2 x 40 mL). The organic phase was washed with sat.  $\text{Na}_2\text{S}_2\text{O}_3$  (20 mL), sat.  $\text{NaHCO}_3$  (40 mL), and brine (40 mL). The combined organic layers were dried ( $\text{MgSO}_4$ ), and concentrated in vacuo. Flash column chromatography (10% diethyl ether in hexanes, silica gel) afforded the title compound as a single isomer (2.95 g, 87%):  **$^1\text{H}$  NMR** (500 MHz,  $\text{CDCl}_3$ ) 7.45-7.28 (m, 5H), 6.68 (dt, 1H,  $J = 14.4, 5.9$  Hz), 6.45 (dt, 1H,  $J = 14.4, 1.5$  Hz), 4.54 (s, 2H), 3.98 (dd,  $J = 5.9, 1.5$  Hz). Data were identical those those reported in the literature.<sup>4</sup>

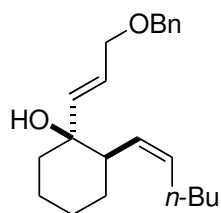

**(1R,2R)-1-((1E)-3-benzyloxy-1-propen-1-yl)-2-((1Z)-1-hexen-1-yl)-cyclohexanol (13):** To a solution of vinyl iodide **S2** (317 mg, 1.16 mmol) in  $\text{Et}_2\text{O}$  (15 mL) at  $-78^\circ\text{C}$  was added a solution of  $n\text{-BuLi}$  in hexanes (511  $\mu\text{L}$ , 2.27 M). The mixture was allowed to stir for 1 minute prior to addition of ketone **S1** (123 mg, 0.68 mmol) in  $\text{Et}_2\text{O}$  (7.5 mL) at  $-78^\circ\text{C}$ . The reaction mixture was allowed to stir for 30 minutes before being warmed to  $0^\circ\text{C}$  and quenched with saturated  $\text{NH}_4\text{Cl}$  solution (15 mL). The organic layer was separated, and the aqueous layer extracted with  $\text{Et}_2\text{O}$  (60 mL). The combined organic layers were washed with  $\text{H}_2\text{O}$  (50 mL), dried ( $\text{Na}_2\text{SO}_4$ ), and concentrated in vacuo. Purification by flash chromatography (20% EtOAc in hexanes) afforded the title compound (201 mg, 90%): **IR** (neat) 3473, 2927, 2854, 1453, 946  $\text{cm}^{-1}$ ;  **$^1\text{H}$  NMR** (500 MHz,  $\text{CDCl}_3$ ) 7.33 (m, 4H), 7.28 (dd, 1H,  $J = 6.3, 2.3$ , Hz), 5.74

4. Huang, Z.; Negishi, E. *Org. Lett.* **2006**, *8*, 3675–3678

(m, 2H), 5.39 (dt, 1H, 11.0, 7.1 Hz), 5.31 (dd, 1H,  $J = 11.0, 9.8$  Hz), 4.48 (d, 2H,  $J = 3.1$  Hz), 4.00 (m, 2H), 2.33 (ddd, 1H,  $J = 10.2$  Hz, 9.8 Hz, 4.4 Hz), 1.98 (m, 2H), 1.71 (m, 1H), 1.65 (m, 1H), 1.58 (m, 2H), 1.50 (m, 2H), 1.43 (m, 1H), 1.36 (s, 1H), 1.29 (m, 5H), 0.88 (t, 3H,  $J = 7.0$  Hz);  $^{13}\text{C}$  NMR (125 MHz,  $\text{CDCl}_3$ ) 141.1, 138.5, 130.9, 129.7, 128.4, 127.8, 127.6, 123.7, 73.2, 71.9, 70.5, 43.6, 38.1, 31.9, 28.5, 27.6, 25.3, 22.5, 21.4, 14.1; HRMS (ESI): Exact mass calc'd for  $\text{C}_{22}\text{H}_{31}\text{O}$  (M-OH $^-$ ), 311.2369. Found 311.2373.  $[\alpha]_{\text{D}} = -57.6$  ( $c = 2.43$  g/100 mL,  $\text{CHCl}_3$ ).

Enantiopurity (97:3 er) was determined by chiral HPLC analysis: Chiraldex OD-H column (0.46 cm x 25 cm), flow rate of 1.0 mL/min, 2% isopropanol in hexanes. Retention times: 10.74 min (-)/12.06 min (+).

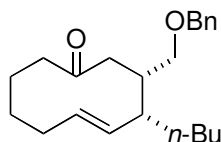

**(3S,4S)-3-(benzyloxy-methylene)-4-(n-butyl)-5(E)-cyclodecenone (12):**

To a stirring suspension of KH (40 mg, 1.0 mmol) in  $\text{Et}_2\text{O}$  (13 mL) at 0 °C was added hexamethyldisilazane (204  $\mu\text{L}$ , 1.0 mmol). The suspension was stirred for 30 minutes at room temperature prior to addition into a stirring solution of allylic alcohol **13** (170 mg, 0.51 mmol) and 18-crown-6 ether (270 mg, 1.02 mmol) in  $\text{Et}_2\text{O}$  (12 mL) at 0 °C. The resulting yellow solution was stirred for 18 h at room temperature. The reaction was quenched with sat.  $\text{NH}_4\text{Cl}$  solution (1 mL) and poured into  $\text{H}_2\text{O}$  (25 mL). The organic layer was separated, and the aqueous layer was back-extracted with  $\text{Et}_2\text{O}$  (10 mL). The combined organic phases were dried ( $\text{Na}_2\text{SO}_4$ ), filtered, and concentrated in vacuo. Purification by flash chromatography on silica gel (20%  $\text{EtOAc}$  in hexanes) afforded the title compound (140 mg, 83%): IR (neat) 3028, 2951, 1704, 1089, 984  $\text{cm}^{-1}$ ; (note: NMR spectra were significantly broadened, presumably due to alkene anisotropy)  $^1\text{H}$  NMR (500 MHz,  $\text{CDCl}_3$ ) 7.34 (m, 4H), 7.29 (dd, 1H,  $J = 5.1, 2.4$  Hz), 5.22 (br m, 2H), 4.52 (br m, 2H), 3.48 (br m, 2H), 2.33 (br s, 5H), 1.93 (br s, 2H), 1.25 (m, 7H), 1.09 (m, 1H), 0.86 (t, 3H,  $J = 7$  Hz);  $^{13}\text{C}$  NMR (125 MHz,  $\text{CDCl}_3$ ) 128.4, 127.6, 127.5, 33.4, 14.2; HRMS (ESI): Exact mass calc'd for  $\text{C}_{22}\text{H}_{33}\text{O}_2$  [ $\text{M}+\text{H}^+$ ], 329.2475. Found 329.2474.  $[\alpha]_{\text{D}} = -7.3$  ( $c = 3.77$  g/100 mL,  $\text{CHCl}_3$ ).

Enantiopurity (97:3 er) was determined by chiral HPLC analysis: Chiraldex OD-H column (0.46 cm x 25 cm), flow rate of 1.0 mL/min, 0.5% isopropanol in hexanes. Retention times: 12.03 min (+)/13.91 min (-).

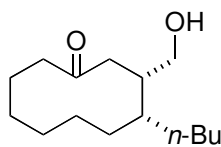

**(3S,4R)-3-(hydroxy-methylene)-4-(n-butyl)-cyclodecanone (S3):**

To a solution of cyclodecanone **12** (116 mg, 0.35 mmol) in dry MeOH (11 mL) was added 10% Pd/C (35 mg). The flask was purged with  $\text{H}_2$ , and the solution allowed to stir under a balloon of  $\text{H}_2$  at room temperature for 19 h. The solution was filtered through celite, eluting with ethyl acetate, and the filtrate concentrated in vacuo. Purification by flash chromatography (50%  $\text{EtOAc}$  in hexanes) afforded the title compound (81 mg, 95%): IR (neat) 3437, 2955, 2931, 2872, 1693, 1266;  $^1\text{H}$  NMR (500 MHz,  $\text{CDCl}_3$ ) 3.70 (dt, 1H,  $J = 10.4, 4.4$  Hz), 3.53 (m, 1H), 2.89 (dd, 1H,  $J = 10.1, 8.7$  Hz), 2.57 (ddd, 1H,  $J = 15.2, 10.4, 3.5$  Hz), 2.47 (ddd, 1H,  $J = 15.2, 7.7, 3.8$  Hz), 2.39 (m, 2H), 2.12 (br s, 1H), 2.05 (m, 1H), 1.70 (m, 1H), 1.64 (app s, 1H), 1.52 (m, 2H), 1.40 (m, 4H), 1.25 (m, 8H), 0.89 (t, 3H,  $J = 7.0$  Hz);  $^{13}\text{C}$  NMR (125 MHz,  $\text{CDCl}_3$ ) 215.9, 64.5, 43.4, 41.9, 40.9, 36.5, 31.6, 30.3, 28.5, 25.7, 25.5, 24.3, 23.9, 22.9, 14.4; HRMS (ESI): Exact mass calc'd for  $\text{C}_{15}\text{H}_{29}\text{O}_2$  [ $\text{M}+\text{H}^+$ ], 241.2162. Found 241.2158.  $[\alpha]_{\text{D}} = -4.9$  ( $c = 0.45$  g/100 mL,  $\text{CHCl}_3$ ).

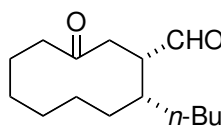

**(3S,4R)-3-(formyl)-4-(n-butyl)-cyclodecanone (S4):**

To a solution of keto-

alcohol **S3** (204 mg, 0.85 mmol) in DCM (28 mL) was added deionized H<sub>2</sub>O (15  $\mu$ L), followed by Dess-Martin periodinane (540 mg, 1.28 mmol). The mixture was allowed to stir for 30 min then diluted with ether, and concentrated to a small volume in vacuo. The residue was taken up in ether and washed with 1:1 0.5 M Na<sub>2</sub>S<sub>2</sub>O<sub>3</sub>/sat. NaHCO<sub>3</sub> (90 mL), H<sub>2</sub>O (30 mL), and brine (30 mL). The aqueous layers were back-extracted with Et<sub>2</sub>O (50 mL), and the combined organic layers were dried (Na<sub>2</sub>SO<sub>4</sub>) and concentrated in vacuo. Purification by flash chromatography (20% EtOAc in hexanes, silica gel) afforded the title compound (166 mg, 82%): **IR** (neat) 2929, 2852, 1724, 1702 cm<sup>-1</sup>; **<sup>1</sup>H NMR** (500 MHz, CDCl<sub>3</sub>) 9.74 (s, 1H), 3.19 (dt, 1H, *J* = 9.7, 3.5 Hz), 2.89 (dd, 1H, 16.2, 9.7 Hz), 2.67 (dd, 1H, 16.2, 3.5 Hz), 2.55 (m, 2H), 2.15 (m, 1H), 2.03 (m, 1H), 1.73 (m, 1H), 1.54-1.18 (br m, 13H), 0.91 (t, 3H, *J* = 7.0 Hz); **<sup>13</sup>C NMR** (125 MHz, CDCl<sub>3</sub>) 213.2, 203.6, 52.0, 43.1, 37.1, 35.6, 31.8, 29.9, 28.7, 26.1, 25.1, 23.8, 23.4, 22.8, 14.0; **HRMS** (ESI): Exact mass calc'd for C<sub>15</sub>H<sub>27</sub>O<sub>2</sub> [M+H<sup>+</sup>], 239.2006. Found 239.2001. [ $\alpha$ ]<sub>D</sub> = +47.7 (c = 0.675 g/100 mL, CHCl<sub>3</sub>).

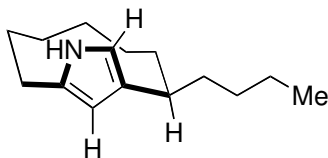

**2-butyl-10-azabicyclo[7.2.1]dodeca-1(11),9(12)diene (syn-11):**

To a solution of dicarbonyl **S4** (166 mg, 0.70 mmol) in anhydrous methanol (7 mL) was added dry NH<sub>4</sub>OAc (540 mg, 7.0 mmol). The stirred solution was heated at reflux at 65 °C for 40 minutes then cooled to room temperature. The reaction mixture was diluted in hexanes (75 mL) and filtered through silica gel, eluting with 20% ethyl acetate in hexanes. The crude material was concentrated in vacuo, and the residue was subject to flash chromatography (20% ethyl acetate in hexanes, silica gel) to afford the title compound as a ca. 10:1 mixture of atropisomers (131 mg, 86%): **IR** (neat) 3372, 2924, 2856, 2361, 2336, 1696, 1454 cm<sup>-1</sup>; **<sup>1</sup>H NMR** (500 MHz, CDCl<sub>3</sub>) 7.70 (br s, 1H), 6.45 (s, 1H), 6.23 (s, 1H), 2.67 (ddd, 1H, *J* = 14.0, 4.6, 2.0 Hz), 2.44 (m, 2H), 1.79-1.62 (m, 5H), 1.55-1.30 (m, 5H), 0.93 (m, 4H), 0.92 (t, 3H, *J* = 7.0 Hz), 0.71 (m, 1H), 0.52 (dd, 1H, *J* = 13.1, 10.8 Hz), -1.89 (m, 1H); **<sup>13</sup>C NMR** (125 MHz, CDCl<sub>3</sub>) 132.6, 130.0, 114.7, 111.7, 41.8, 41.2, 33.5, 32.6, 30.3, 30.0, 29.8, 29.4, 26.7, 23.0, 14.2; **HRMS** (ESI) Exact mass calc'd for C<sub>15</sub>H<sub>25</sub>N [M+H<sup>+</sup>], 220.2060. Found 220.2057. [ $\alpha$ ]<sub>D</sub> = -32.7 (c = 0.345 g/100 mL, CHCl<sub>3</sub>).

Enantiopurity ( $\geq$ 97:3 er) was checked by chiral HPLC analysis: Chiraldex OD-H column (0.46 cm x 25 cm), flow rate of 1.0 mL/min, 2% isopropanol in hexanes. Retention times: 6.91 min (-)/9.27 min (+).

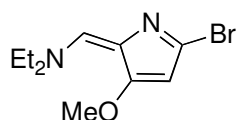

**(E)-N-((5-bromo-3-methoxy-2H-pyrrol-2-ylidene)methyl)-N-ethylethanamine (S5):**

To a solution of diethyl formamide (1.54 mL, 13.8 mmol) in DCM (12 mL) at 0 °C was added dropwise phosphorous oxybromide (4.84 g, 16.8 mmol) in DCM (3 mL) over 15 minutes. The solution was stirred at 0 °C for 10 minutes before addition of 4-methoxy-3-pyrrolin-2-one (1.0 g, 8.9 mmol) in several portions over 5 minutes. The mixture was stirred for 10 minutes at 0 °C and then heated to reflux for 3.5 h. The mixture was cooled to 0 °C and H<sub>2</sub>O (1.7 mL) was added dropwise, maintaining the temperature below 20 °C. The solution was neutralized with 15% aq. NaOH (ca. 20 mL) and extracted with DCM (2 x 20 mL). The organic layers were dried (Na<sub>2</sub>SO<sub>4</sub>), filtered, and concentrated in vacuo. Flash chromatography (25% ethyl acetate in hexanes, silica gel) of the residue afforded the title compound (1.27 g, 55%), which was identical in all aspects to that which was previously reported.<sup>5</sup>

5. Dairi, K.; Tripathy, S.; Attardo, G.; Lavaleé, J. F. *Tetrahedron Lett.* **2006**, *47*, 2605–2606.

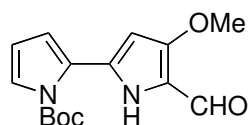

**tert-butyl 5'-formyl-4'-methoxy-1H,1'H-2,2'-bipyrrole-1-carboxylate (21):** To Pd(OAc)<sub>2</sub> (30 mg, 0.14 mmol) in toluene (1 mL) was added triphenylphosphine (159 mg, 0.61 mmol). The yellow slurry was stirred for 20 minutes at 70 °C, followed by the addition of bromoenamine **S5** (350 mg, 1.34 mmol) and *N*-Boc-pyrrole-2-boronic acid (427 mg, 2.0 mmol) in degassed 9:1 dioxane/H<sub>2</sub>O (11.5 mL). Na<sub>2</sub>CO<sub>3</sub> (429 mg, 4.0 mmol) was added, and the solution was degassed with Ar before heating to 85 °C for 3.5h. The reaction was cooled to room temperature before being diluted with H<sub>2</sub>O (20 mL) and DCM (20 mL). The mixture was stirred vigorously as 2M HCl was added to neutralize the solution. The mixture was extracted with DCM (2 x 20 mL) and the organic layers were dried (Na<sub>2</sub>SO<sub>4</sub>), filtered, and concentrated in vacuo. Flash chromatography (15% ethyl acetate in hexanes, silica gel) afforded the title compound as an orange powder (292 mg, 75%), which was identical in all aspects to that which was previously reported.<sup>6</sup>

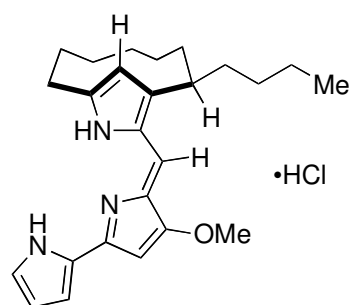

**(R)-streptorubin B hydrochloride (1):** To pyrrole *syn*-**11** (19 mg, 0.09 mmol) and biaryl aldehyde **21** (31 mg, 0.11 mmol) was added anhydrous MeOH (1.5 mL). The stirred solution was placed in a water bath (18 °C) and a solution of HCl in MeOH (91 μL, 1 M, freshly generated from AcCl in MeOH) was added, upon which the solution turned brilliant red. The solution was stirred for 1 h 15 min before addition of a suspension of NaOMe in MeOH (910 μL, 0.5 M), upon which the solution turned a dark brown. After 45 min, LCMS showed the reaction to be complete, and the reaction mixture was poured into Et<sub>2</sub>O (25 mL) and washed with H<sub>2</sub>O (15 mL). The aqueous layer was extracted with Et<sub>2</sub>O (15 mL) and the combined organic layers were dried (Na<sub>2</sub>SO<sub>4</sub>). Two iterations of column chromatography (5% Et<sub>2</sub>O and 5% NEt<sub>3</sub> in pentanes, then CHCl<sub>3</sub> to 3% MeOH/CHCl<sub>3</sub>, silica gel) afforded the natural product as the HCl salt, as a ca. 1:1 mixture of atropisomers, which upon standing at room temperature in CHCl<sub>3</sub> in a closed vessel equilibrated to a single atropisomer (28 mg, 72%). Single crystals for X-ray diffraction were grown by vapor diffusion of hexanes into a concentrated solution of **1** in ethyl acetate (ca. 5 mg in 0.2 mL solvent). **IR** (neat) 3436, 3371, 3019, 2937, 1764 cm<sup>-1</sup>; **<sup>1</sup>H NMR** (500 MHz, CDCl<sub>3</sub>) 12.70 (s, 1H), 12.66 (s, 1H), 12.58 (s, 1H), 7.22 (s, 1H), 7.21 (s, 1H), 7.11 (s, 1H), 6.90 (s, 1H), 6.51 (s, 1H), 6.34 (t, 1H, *J* = 2.7 Hz), 6.09 (s, 1H), 4.02 (s, 3H), 3.33 (m, 1H), 3.10 (m, 1H), 2.53 (dt, 1H, *J* = 12.3, 5.4 Hz), 1.96-1.68 (m, 5H), 1.55 (m, 2H), 1.37 (m, 5H), 1.14 (m, 2H), 1.24 (m, 3H), 0.91 (m, 5H), 0.78 (m, 1H), -1.55 (dt, 1H, *J* = 14.1, 8.8 Hz); **<sup>13</sup>C NMR** (125 MHz, CDCl<sub>3</sub>) 165.4, 154.4, 150.6, 147.0, 126.7, 125.0, 122.4, 120.3, 116.8, 116.6, 112.5, 111.5, 92.8, 58.7, 38.9, 37.5, 31.7, 30.9, 30.4, 30.0, 29.1, 27.7, 25.4, 22.9, 14.2; **HRMS** (ESI) Exact mass calc'd for C<sub>25</sub>H<sub>33</sub>N<sub>3</sub>O [M+H<sup>+</sup>], 392.2696. Found 392.2700.

**(S)-Streptorubin B hydrochloride (ent-1):** The same procedures used for the synthesis of (*R*)-streptorubin B were employed in the syntheses of (*S*)-streptorubin B and *rac*-streptorubin B, with the exception that (*R*)-proline or *rac*-proline was used instead of (*S*)-proline in the desymmetrizing aldol-Wittig sequence.

6. Aldrich, L. N.; Dawsen, E. S.; Linsley, C. W. *Org. Lett.* **2010**, *12*, 1048–1051.

## Part 4: Experimental Procedures: Exploration of Pyrrole Atropisomer (Unoptimized)

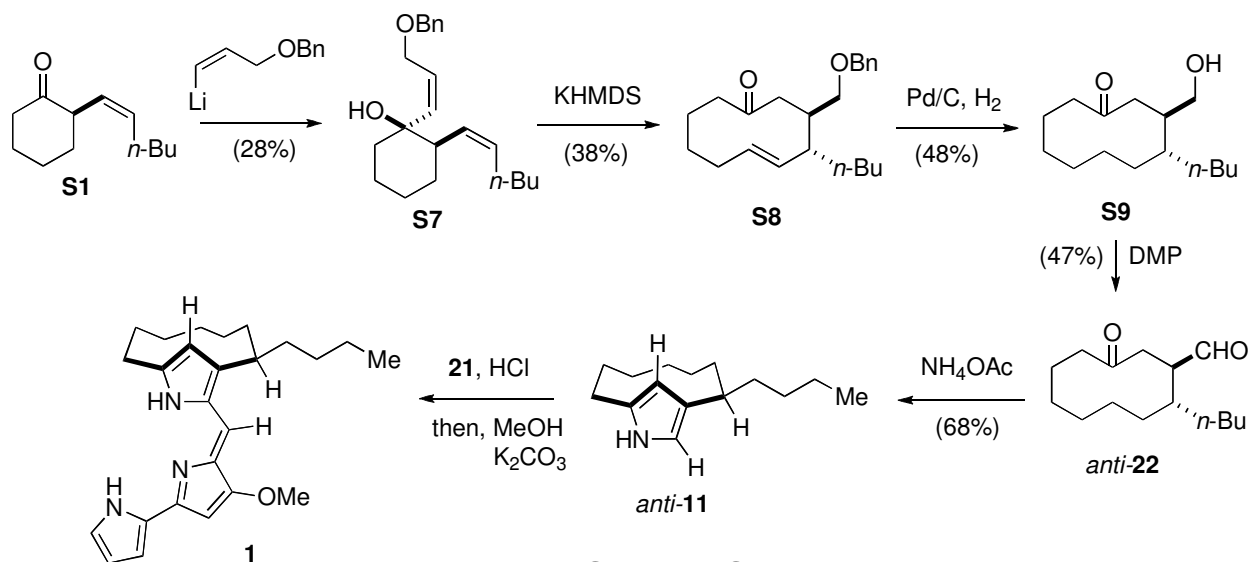

**(Z)-1-benzyloxy-3-iodo-2-propene (S6):** To benzyl propynol (5.0 g, 35 mmol) was added tributyltin hydride (13.0 g, 44.9 mmol). AIBN (57 mg, 0.35 mmol) was added, and the stirring solution was heated at 120 °C for 3 hours. The crude solution was diluted in DCM (340 mL), and a solution of I<sub>2</sub> (11.8 g, 46.6 mmol) in DCM (350 mL) was titrated into the stirring solution via addition funnel. The resulting dark solution was quenched with sat. Na<sub>2</sub>S<sub>2</sub>O<sub>3</sub> (250 mL), washed with 0.5 M aq. NaOH (250 mL), brine (250 mL), and filtered through silica, eluting with DCM. Flash column chromatography (10% diethyl ether in hexanes, silica gel) afforded the title compound in two fractions, the first containing a ~1:1 mixture of the Z and E isomers (3.0 g), the second containing a ~3:2 mixture of Z and E isomers (2.3 g, 56%): <sup>1</sup>H NMR (500 MHz, CDCl<sub>3</sub>) 7.40-7.28 (m, 5H), 6.50 (dt, 1H, *J* = 7.6, 5.4 Hz), 6.41 (m, 1H), 4.54 (s, 2H), 4.13 (dd, *J* = 5.5, 1.5 Hz).

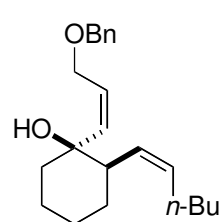

**(1R,2R)-1-((1Z)-3-benzyloxy-1-propen-1-yl)-2-((1Z)-1-hexen-1-yl)-cyclohexanol (S7):** To a solution of a ~3:2 mixture of *Z*:*E* vinyl iodide S6 (643 mg, 2.35 mmol) in Et<sub>2</sub>O (30 mL) at -78 °C was added a solution of *n*-BuLi in hexanes (2.35 mL, 1.0 M). The mixture was allowed to stir for 4 minutes prior to addition of ketone S1 (249 mg, 1.38 mmol) in Et<sub>2</sub>O (16 mL) at -78 °C. The reaction mixture was allowed to stir for 50 minutes before being warmed to 0 °C and quenched with saturated NH<sub>4</sub>Cl solution (30 mL).

The organic layer was separated, and the aqueous layer extracted with Et<sub>2</sub>O (30 mL). The combined organic layers were washed with H<sub>2</sub>O (15 mL), dried (Na<sub>2</sub>SO<sub>4</sub>), and concentrated in vacuo. Purification by flash chromatography (5% EtOAc in hexanes) afforded the title compound (126 mg, 28%), along with the corresponding alkynyl addition product (85 mg, 19%) and the *E*-allylic alcohol S7 (50 mg, 11%): IR (neat) 3457, 3012, 2956, 2858, 1454 cm<sup>-1</sup>; <sup>1</sup>H NMR (500 MHz, CDCl<sub>3</sub>) 7.36-7.27 (m, 5H), 5.57-5.48 (m, 2H), 4.54 (d, 2H, *J* = 3.84 Hz), 4.25 (app t, 2H, *J* = 5.4 Hz), 3.06 (s, 1H), 2.30 (m, 1H), 2.07-1.96 (m, 2H), 1.74 (m, 1H), 1.69 (m, 1H), 1.59 (m, 1H), 1.51 (m, 2H), 1.43 (m, 1H), 1.39 (m, 1H), 1.31 (m, 4H), 1.28 (m, 1H), 0.89



(m, 3H);  $^{13}\text{C}$  NMR (125 MHz,  $\text{CDCl}_3$ ) 141.2, 130.6, 130.1, 128.4, 127.8, 127.7, 126.5, 124.9, 74.5, 72.5, 66.6, 44.4, 38.4, 32.0, 28.2, 27.5, 25.1, 22.4, 21.1, 14.1; HRMS (ESI): Exact mass calc'd for  $\text{C}_{22}\text{H}_{32}\text{O}_2\text{Na}$  ( $\text{M}+\text{Na}^+$ ), 351.2295. Found 351.2296.

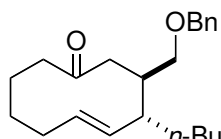

**(3R,4S)-3-(benzyloxy-methylene)-4-(n-butyl)-5(E)-cyclodecenone (S8):**

To a stirring solution of allylic alcohol **S7** (120 mg, 0.37 mmol) and 18-crown-6 ether (241 mg, 0.91 mmol) in  $\text{Et}_2\text{O}$  (15 mL) at 0 °C was added KHMDS in toluene (0.5 M, 1.83 mL). The resulting yellow solution was stirred for 32 h at room temperature. The reaction was quenched with sat.  $\text{NH}_4\text{Cl}$  solution (5 mL) and poured into  $\text{H}_2\text{O}$  (15 mL). The organic layer was separated, and the aqueous layer was back-extracted with  $\text{Et}_2\text{O}$  (2 x 10 mL). The combined organic phases were dried ( $\text{Na}_2\text{SO}_4$ ), filtered, and concentrated in vacuo. Purification by flash chromatography on silica gel (5%  $\text{EtOAc}$  in hexanes) afforded the title compound (46 mg, 38%): **IR** (neat) 2952, 2928, 2856, 1707, 1443, 1100  $\text{cm}^{-1}$ ; (note: the NMR spectrum did not display the same obscurity observed for the other diastereomer)  $^1\text{H}$  NMR (500 MHz,  $\text{CDCl}_3$ ) 7.36-7.26 (m, 5H), 5.30 (ddd, 1H,  $J = 14.6, 11.0, 3.9$  Hz), 4.88 (dd, 1H,  $J = 14.6, 10.4$  Hz), 4.54 (d, 1H,  $J = 12.1$  Hz), 4.43 (d, 1H,  $J = 12.1$  Hz), 3.47 (m, 2H), 2.47 (m, 1H), 2.44 (m, 1H), 2.36 (m, 1H), 2.32 (m, 1H), 2.30 (m, 1H), 2.22 (m, 1H), 1.88 (m, 1H), 1.86 (m, 2H), 1.73 (m, 1H), 1.60 (m, 1H), 1.43 (m, 1H), 1.27 (m, 1H), 1.23-1.16 (m, 3H), 1.07 (m, 1H), 0.84 (t, 3H,  $J = 7.2$  Hz);  $^{13}\text{C}$  NMR (125 MHz,  $\text{CDCl}_3$ ) 211.8, 139.5, 138.6, 129.7, 128.4, 127.6, 127.5, 73.0, 71.8, 47.8, 46.7, 45.4, 44.3, 33.5, 31.3, 29.9, 28.8, 22.7, 22.5, 14.1; HRMS (ESI): Exact mass calc'd for  $\text{C}_{22}\text{H}_{32}\text{O}_2\text{Na}$  [ $\text{M}+\text{Na}^+$ ], 351.2295. Found 351.2305.

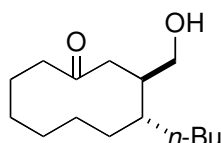

**(3R,4R)-3-(hydroxy-methylene)-4-(n-butyl)-cyclodecanone (S9):**

To a solution of cyclodecanone **S8** (46 mg, 0.14 mmol) in dry MeOH (4 mL) was added 10% Pd/C (14 mg). The flask was purged with  $\text{H}_2$ , and the solution stirred under a balloon of  $\text{H}_2$  at room temperature for 16 h. The solution was filtered through celite, eluting with ethyl acetate, and concentrated in vacuo. Purification by flash chromatography (30%  $\text{EtOAc}$  in hexanes) afforded the title compound (16 mg, 48%): **IR** (neat) 3305, 2953, 2926, 1694, 1440, 1068;  $^1\text{H}$  NMR (500 MHz,  $\text{CDCl}_3$ ) 3.74 (dd, 1H,  $J = 10.8, 3.2$  Hz), 3.58 (m, 1H), 2.86 (dd, 1H,  $J = 16.2, 3.4$  Hz), 2.61 (m, 2H), 2.53 (s, 1H), 2.46 (ddd, 1H,  $J = 14.1, 8.5, 3.4$  Hz), 1.99 (m, 1H), 1.86 (m, 1H), 1.75 (m, 1H), 1.56 (m, 1H), 1.50 (m, 1H), 1.43-1.15 (m, 13H), 0.88 (t, 3H,  $J = 7.1$  Hz);  $^{13}\text{C}$  NMR (125 MHz,  $\text{CDCl}_3$ ) 216.4, 65.5, 45.6, 44.6, 42.4, 36.2, 31.9, 28.9, 27.7, 26.2, 25.8, 24.2, 23.7, 23.2, 14.2; HRMS (ESI): Exact mass calc'd for  $\text{C}_{15}\text{H}_{28}\text{O}_2\text{Na}$  [ $\text{M}+\text{Na}^+$ ], 263.1982. Found 263.1982.

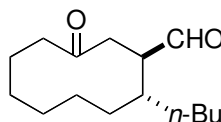

**(3R,4R)-3-(formyl)-4-(n-butyl)-cyclodecanone (anti-22):**

To a solution of keto-alcohol **S9** (15 mg, 0.063 mmol) in DCM (2 mL) was added deionized  $\text{H}_2\text{O}$  (~1  $\mu\text{L}$ ), followed by Dess-Martin periodinane (40 mg, 0.094 mmol). The solution was allowed to stir for 10 min, then diluted in ether (25 mL) and washed with 1:1 0.5 M  $\text{Na}_2\text{S}_2\text{O}_3$ /sat.  $\text{NaHCO}_3$  (25 mL). The aqueous layer was back-extracted with  $\text{Et}_2\text{O}$  (2 x 10 mL) and the combined organic layers were dried ( $\text{Na}_2\text{SO}_4$ ) and concentrated in vacuo. Purification by flash chromatography (20%  $\text{EtOAc}$  in hexanes, silica gel) afforded the title compound (7.0 mg, 47%): **IR** (neat) 2955, 2930, 2859, 1721, 1703, 1455, 1358  $\text{cm}^{-1}$ ;  $^1\text{H}$  NMR (500 MHz,  $\text{CDCl}_3$ ) 9.82 (s, 1H), 2.77 (app s, 3H), 2.63 (ddd, 1H,  $J = 14.3, 9.8, 3.7$  Hz), 2.52 (ddd, 1H, 14.3, 8.2, 3.3 Hz), 1.87 (m, 2H), 1.77 (m, 1H), 1.55 (m, 2H), 1.46-1.22 (m, 11H),

## Supporting Information

0.91 (t, 3H,  $J = 6.9$  Hz);  $^{13}\text{C}$  NMR (125 MHz,  $\text{CDCl}_3$ ) 212.2, 204.3, 52.8, 43.8, 42.0, 36.0, 33.3, 29.2, 26.9, 26.5, 24.9, 23.7, 23.0, 22.9, 14.1; HRMS (ESI): Exact mass calc'd for  $\text{C}_{15}\text{H}_{26}\text{O}_2\text{Na}$  [ $\text{M}+\text{Na}^+$ ], 261.1825. Found 261.1825.

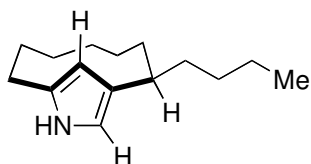

**2-butyl-10-azabicyclo[7.2.1]dodeca-1(11),9(12)diene (*anti*-11):** To a solution of dicarbonyl *anti*-22 (1.0 mg, 0.004 mmol) in anhydrous methanol (0.5 mL) was added dry  $\text{NH}_4\text{OAc}$  (6 mg, 0.077 mmol). The stirred solution was heated at reflux at  $65^\circ\text{C}$  for 35 minutes under  $\text{N}_2$  and cooled to room temperature. The reaction mixture was diluted in hexanes (2 mL) and the solution was immediately subjected to flash chromatography (10% ethyl acetate in hexanes, silica gel) to afford the title compound as a ca. 5:1 mixture of atropisomers, favoring *anti*-11 (0.6 mg, 68%):  $^1\text{H}$  NMR (500 MHz,  $\text{CDCl}_3$ ) 7.62 (s, 1H), 6.47 (s, 1H), 6.26 (s, 1H), 2.79 (m, 1H), 2.63 (ddd, 1H,  $J = 14, 4.7, 1.8$  Hz), 2.45 (ddd, 1H,  $J = 14.0, 13.0, 5.0$  Hz), 1.80-1.61 (m, 4H), 1.49-1.24 (m, 8H), 1.07-0.82 (m, 4H), 0.89 (t, 3H,  $J = 6.44$  Hz), 0.69 (ddd, 1H,  $J = 13.6, 11.7, 7.5$  Hz), -1.86 (dt, 1H,  $J = 13.4, 8.7$  Hz);  $^{13}\text{C}$  NMR (125 MHz,  $\text{CDCl}_3$ ) 133.2, 129.2, 114.5, 111.6, 39.4, 37.3, 32.4, 31.9, 30.7, 29.5, 29.4, 27.3, 26.0, 23.0, 14.3; HRMS (ESI) Exact mass calc'd for  $\text{C}_{15}\text{H}_{25}\text{N}$  [ $\text{M}+\text{H}^+$ ], 220.2060. Found 220.2057.

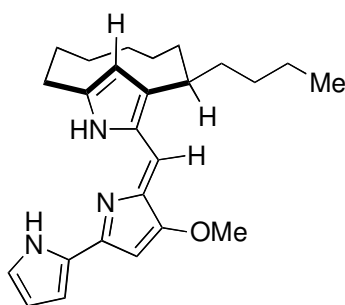

**Streptorubin B (1):** To the purified *anti*-11 (0.6 mg, 0.003 mmol) and biaryl aldehyde 21 (2 mg, 0.007 mmol) was added anhydrous MeOH (0.25 mL). To the stirred solution in a water bath ( $18^\circ\text{C}$ ) was added a solution of HCl in MeOH (6  $\mu\text{L}$ , 1M, freshly generated from AcCl in MeOH), upon which the solution turned a brilliant pink. The solution was let stir for 1 h 5 min before addition of a suspension of NaOMe in MeOH (120  $\mu\text{L}$ , 0.5 M), upon which the solution turned a bright yellow-orange color. After 45 min, the reaction mixture was poured into  $\text{Et}_2\text{O}$  (10 mL) and washed with  $\text{H}_2\text{O}$  (5 mL). The organic layer was dried ( $\text{Na}_2\text{SO}_4$ ) and concentrated in vacuo. The residue was immediately subjected to column chromatography ( $\text{CHCl}_3$ , silica gel), and the fractions containing streptorubin B were concentrated and diluted with hexanes/diethylamine (99.9:0.1), and subject to HPLC analysis (Chiraldex IA column (0.46 cm x 25 cm), flow rate of 1.0 mL/min, 5% isopropanol in 95% hexanes with 0.1% diethylamine. Retention times: 7.30 min ((*S*)-streptorubin B)/8.16 min (*atropdia*-(*R*)-streptorubin B)/9.94 min (*atropdia*-(*S*)-streptorubin B)/26.90 min ((*R*)-streptorubin B). Analysis revealed the selective formation of streptorubin B over the atropisomer.

### Part 5: Measurement of Atropisomerism Activation Barrier

Freshly prepared atrop-streptorubin B (2 mg) was dissolved in chloroform (30 mL) and partitioned into two equal fractions. One fraction was let stir in an ambient temperature bath (20 °C) and the other was let stir in an oil bath at 40 °C. Fractions (1 mL) were periodically drawn from the two fractions and concentrated. The relative concentrations of the two atropdiastereomers was assayed by HPLC (Chiraldex IA column [(0.46 cm x 25 cm), flow rate of 1.0 mL/min, 5% isopropanol in 95% hexanes with 0.1% diethylamine]. Retention times: 7.30 min (streptorubin B)/9.94 min (atrop-streptorubin B). The relative absorptive efficiency between the two atropdiastereomers was approximately 1:1, as determined by comparison of <sup>1</sup>H NMR spectroscopy and HPLC derived data. The activation barrier (~20.5 kcal/mol) was approximated using the Arrhenius equation, assuming first-order equilibration with a rate equation of the form:

$$\ln(X) = \ln\left(\frac{[S]_0 - [S]_e}{[S]_t - [S]_e}\right) = (k_1 + k_{-1})t$$

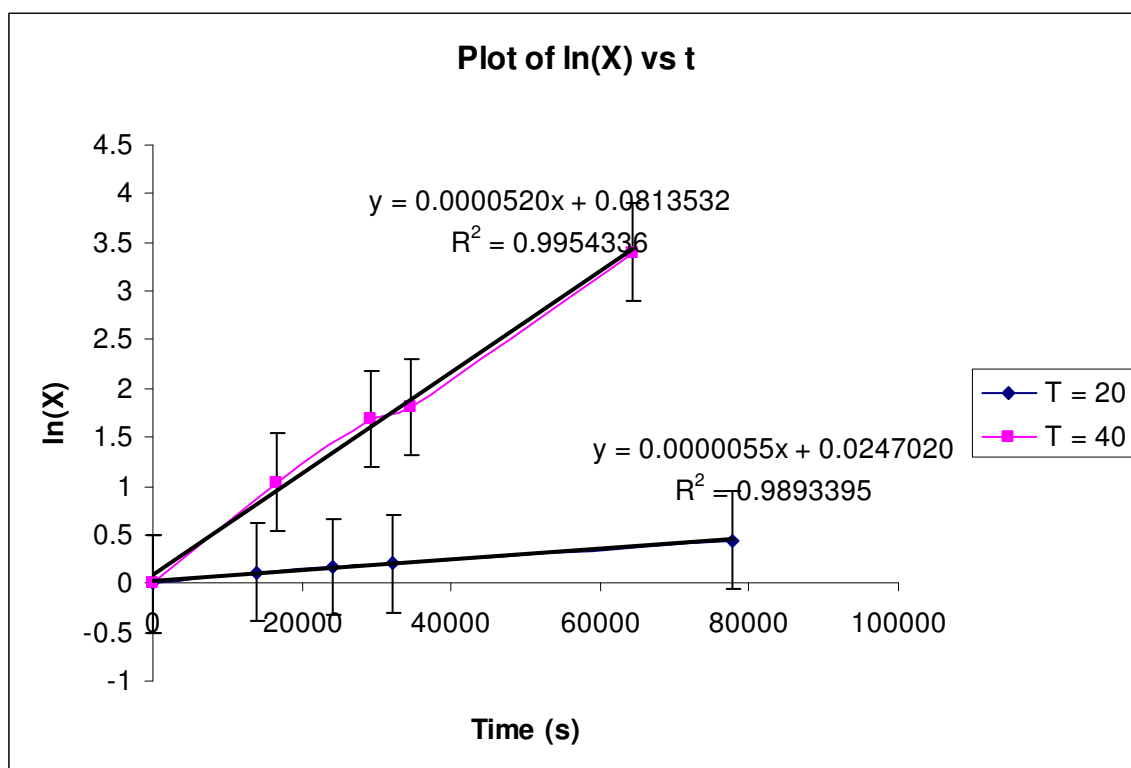

Part 6: CD Spectra

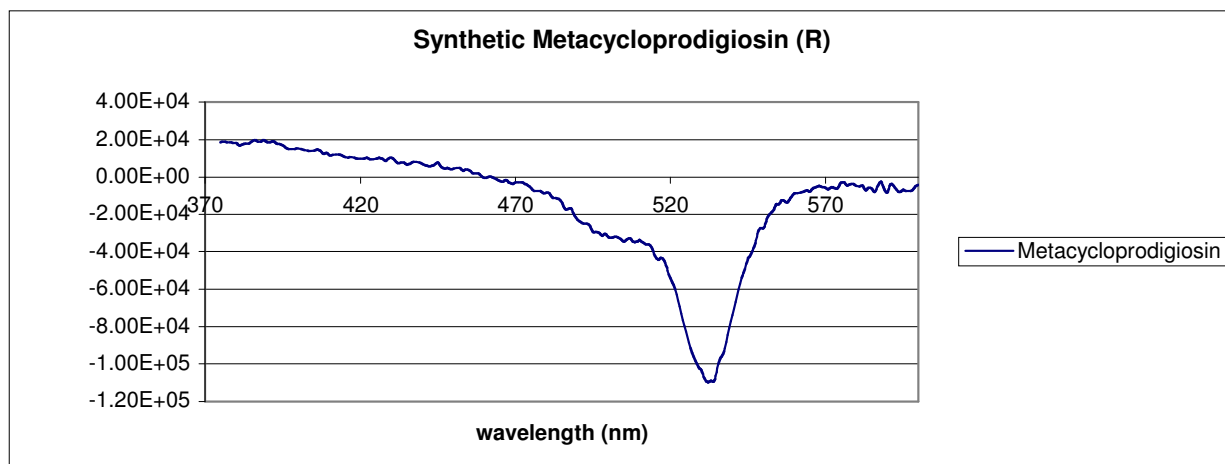

**Figure S1.** Synthetic Metacycloprodigiosin (R). Prepared according to Clift, M. D.; Thomson R. J., *J. Am. Chem. Soc.*, **2009**, *131*, 14579–14583.

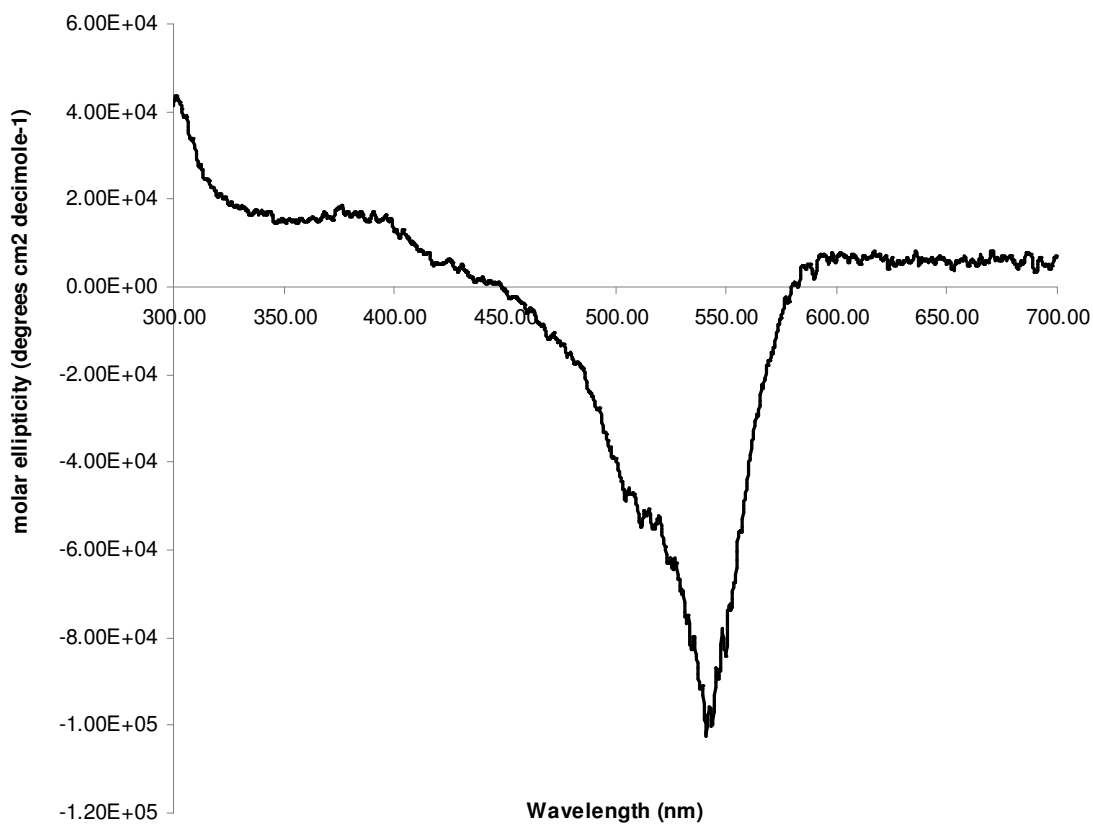

**Figure S2.** Natural Metacycloprodigiosin (S) isolated from *S. coelicolor* W31 + *mcpG*. Spectrum courtesy of Prof. Gregory Challis, University of Warwick.

Supporting Information

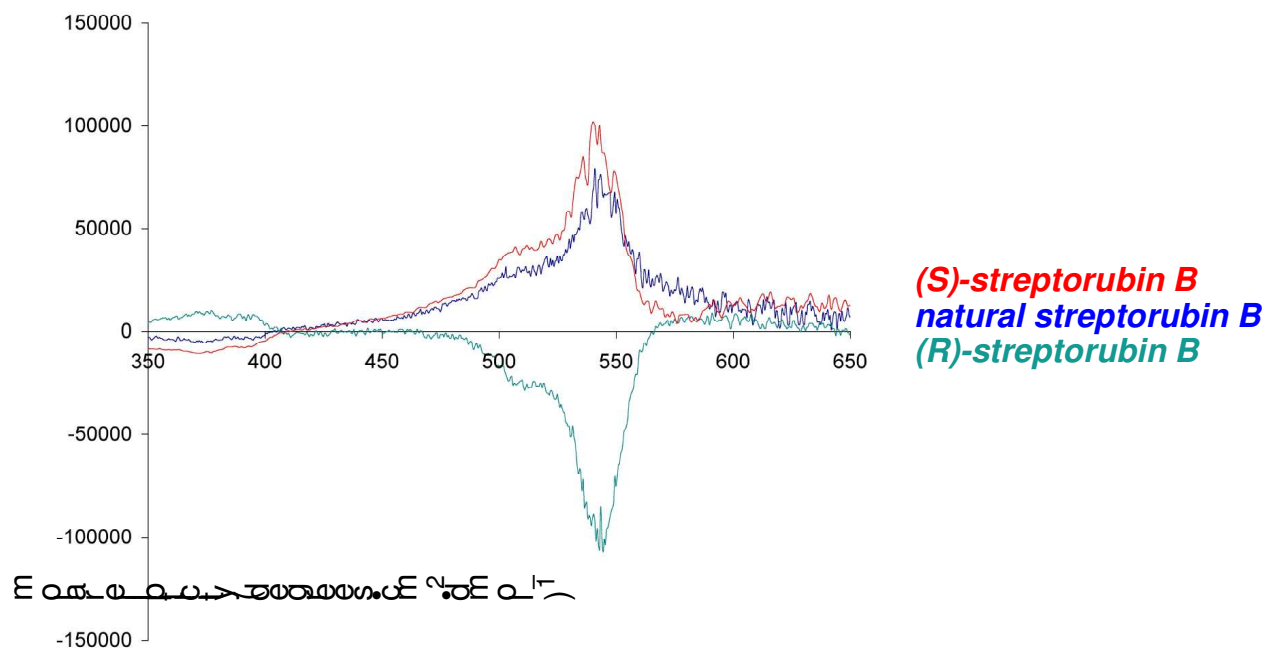

**Figure S3.** Comparison of synthetic streptorubin B (both enantiomers) with a natural sample isolated from *S. coelicolor* M511 (provided by Prof. Gregory Challis, University of Warwick).

Part 7: <sup>1</sup>H and <sup>13</sup>C NMR Spectra

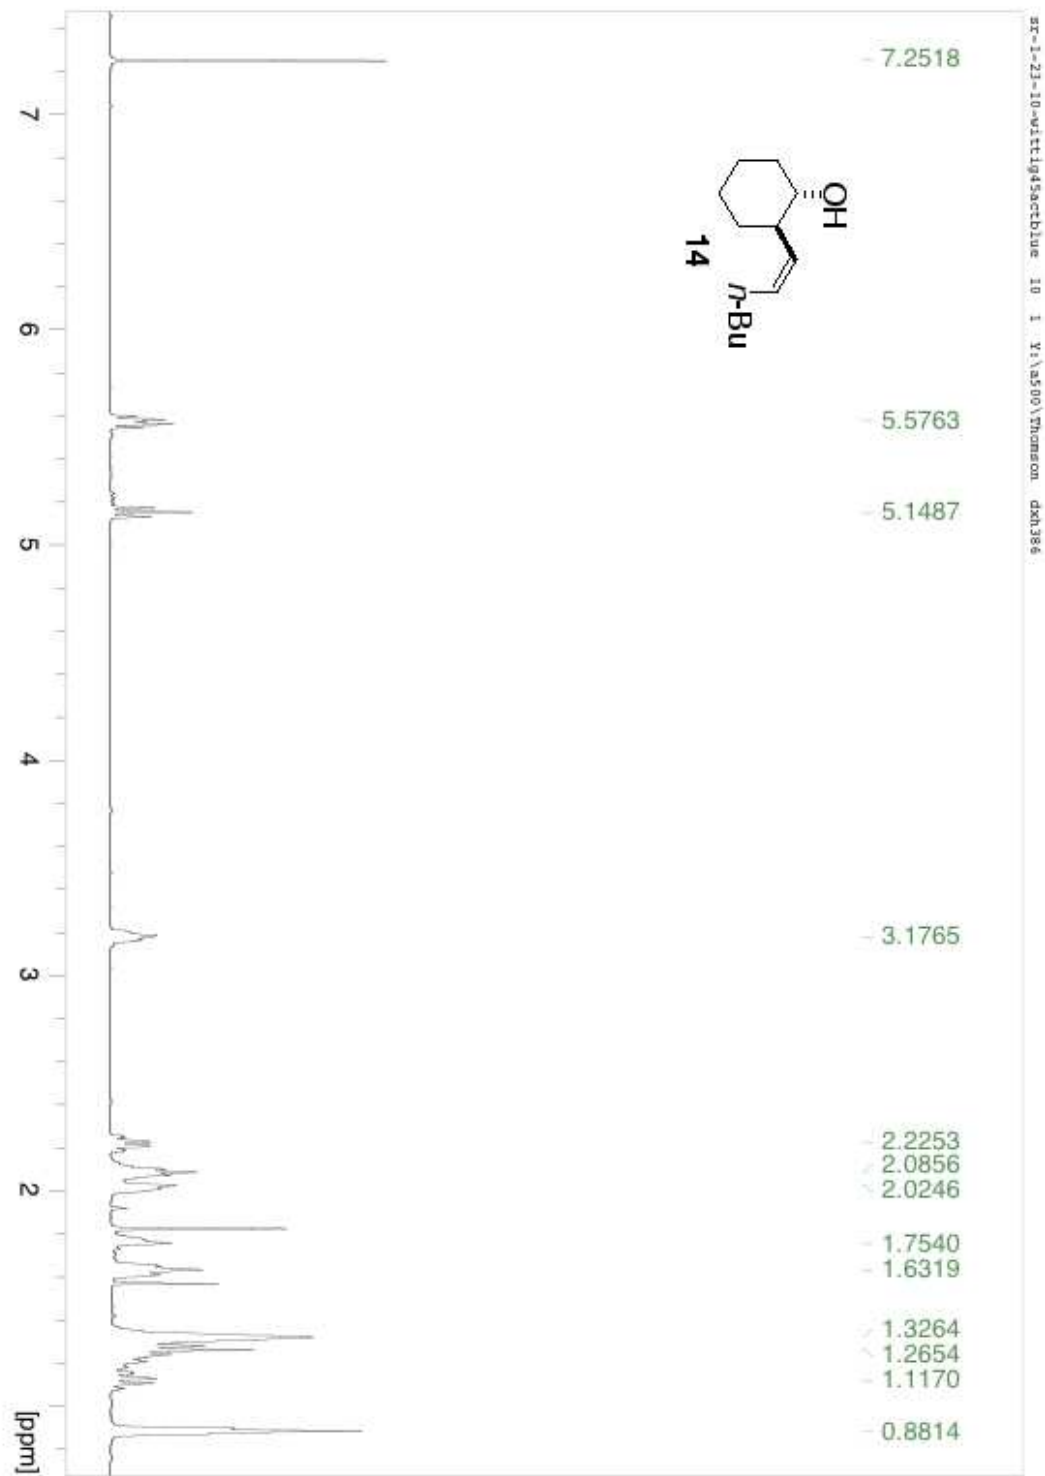

Supporting Information

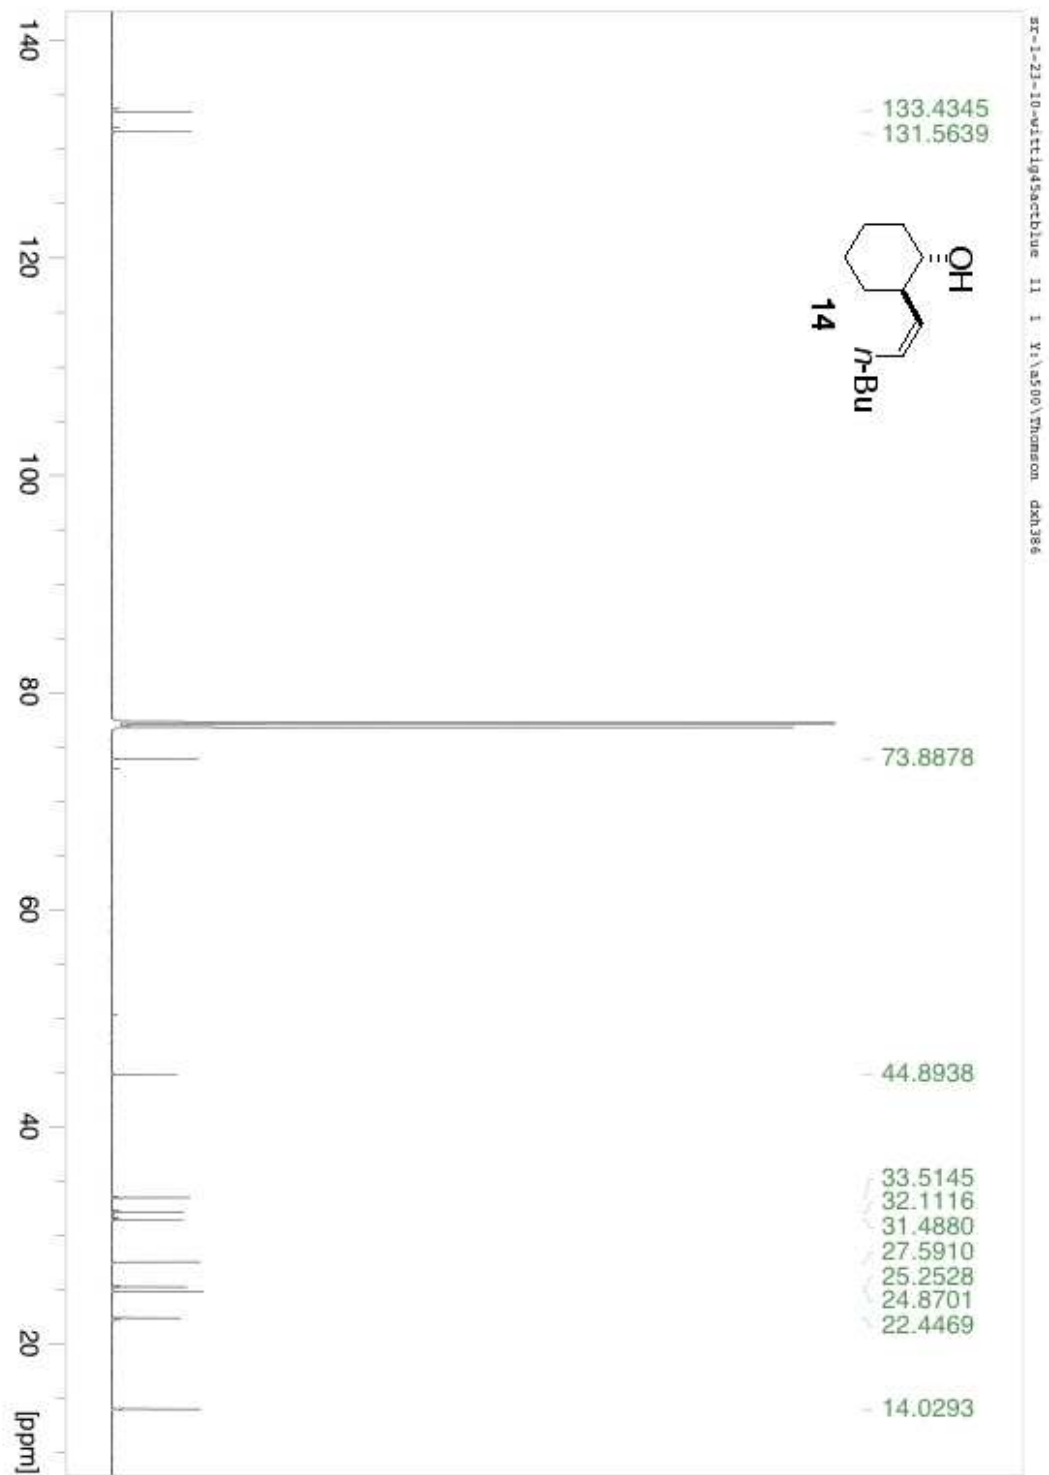

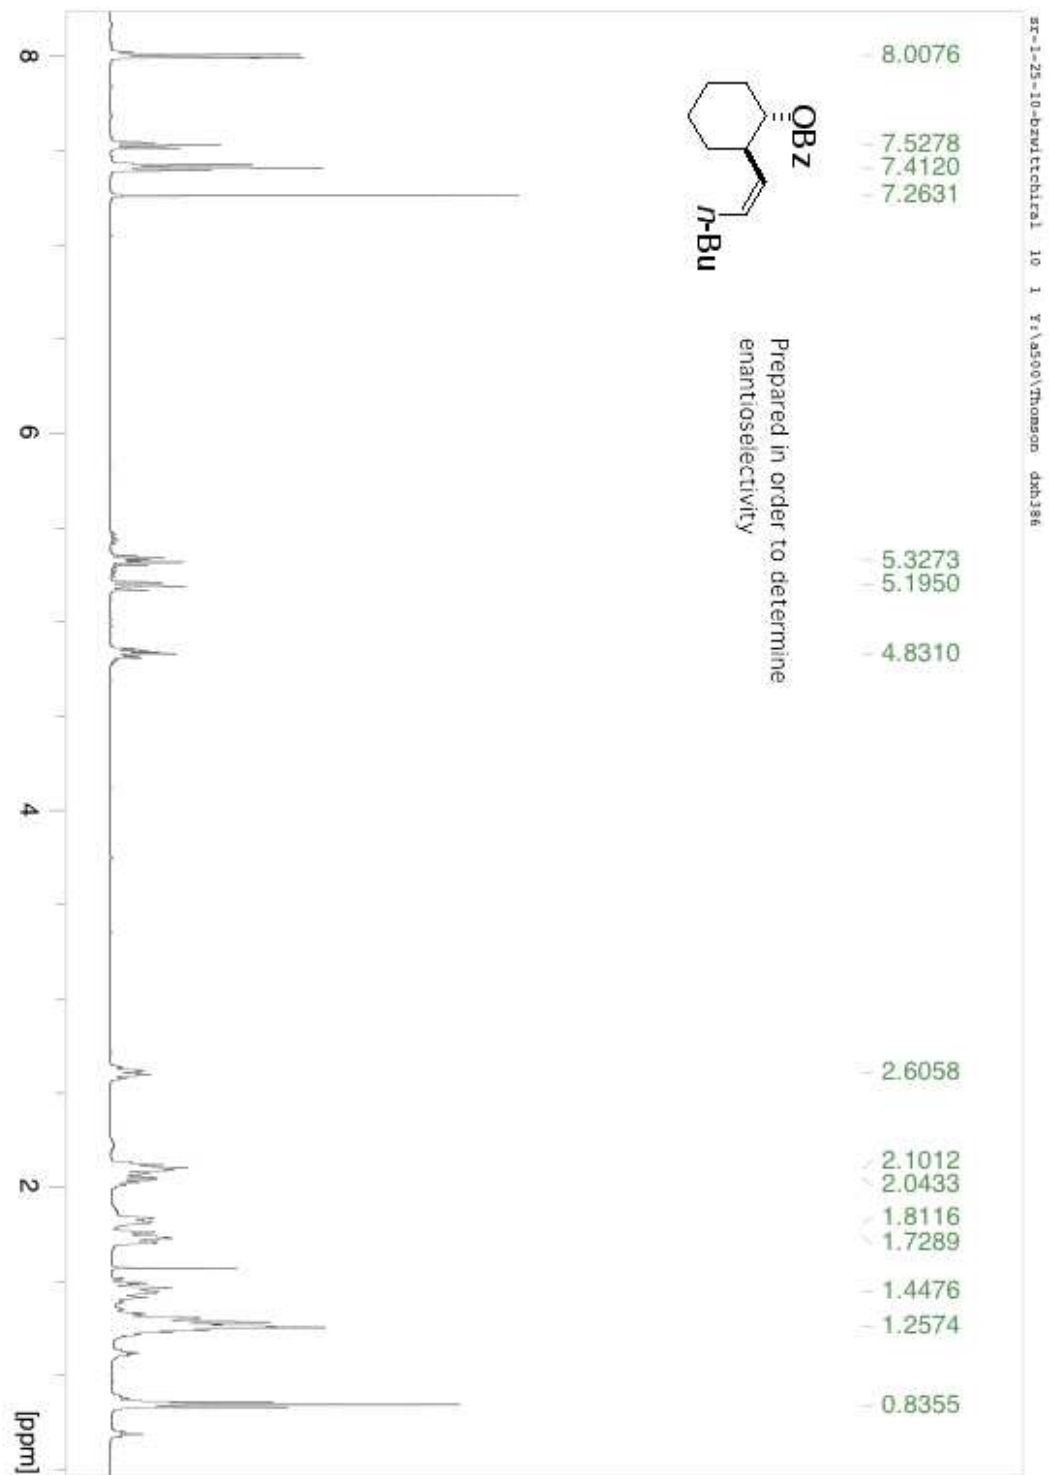



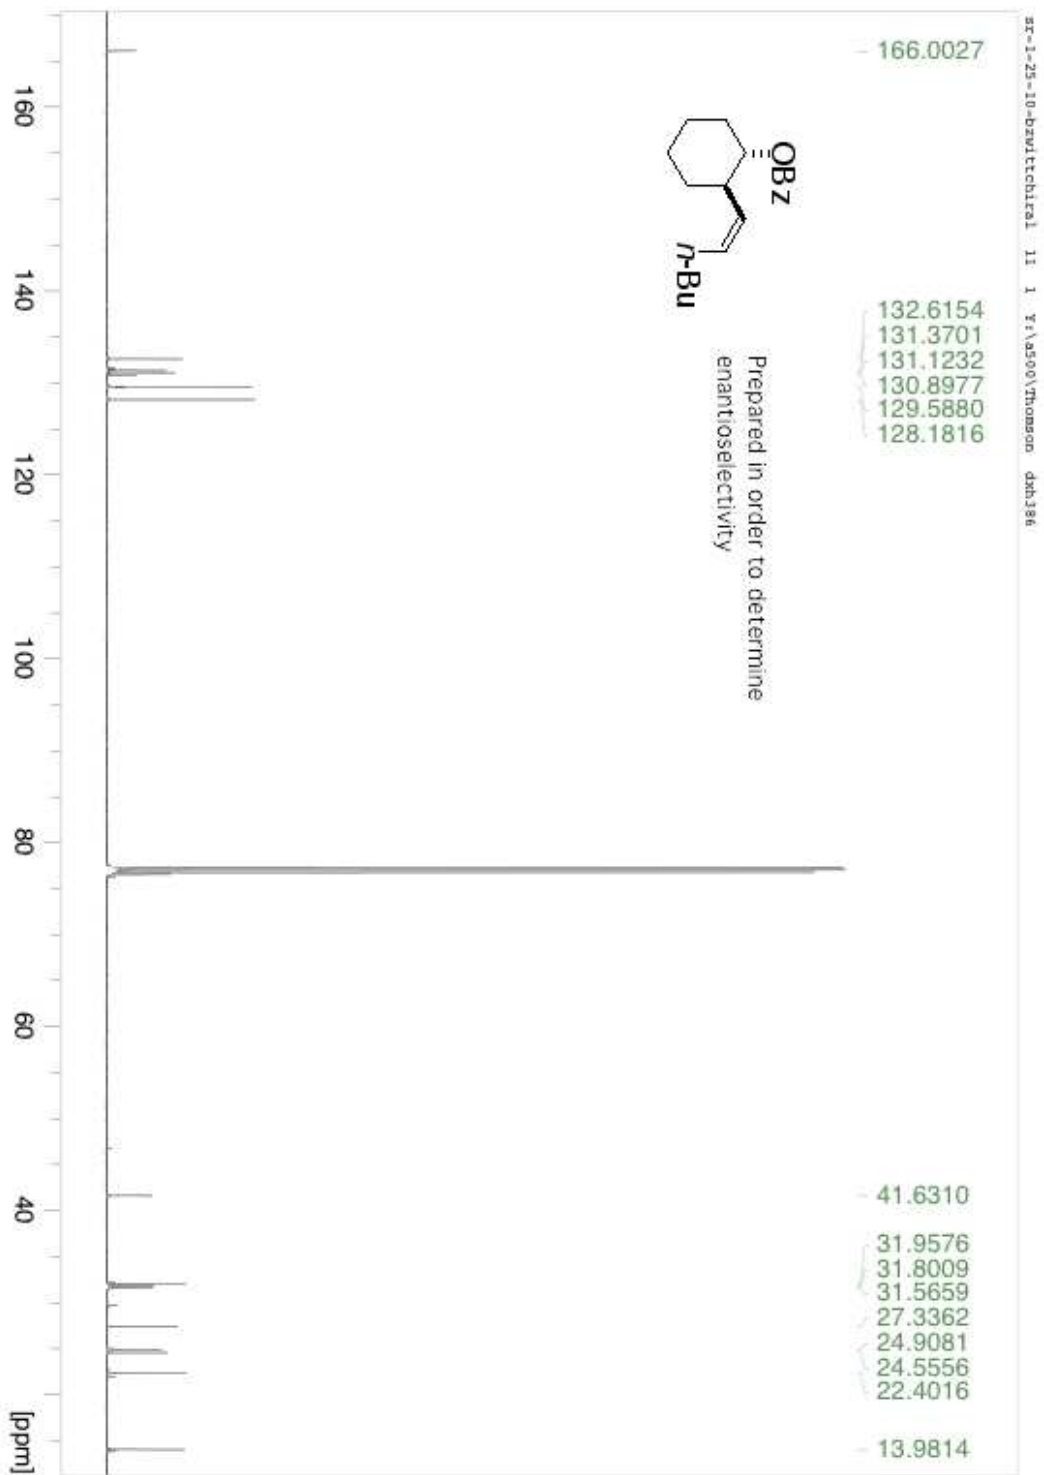

Supporting Information

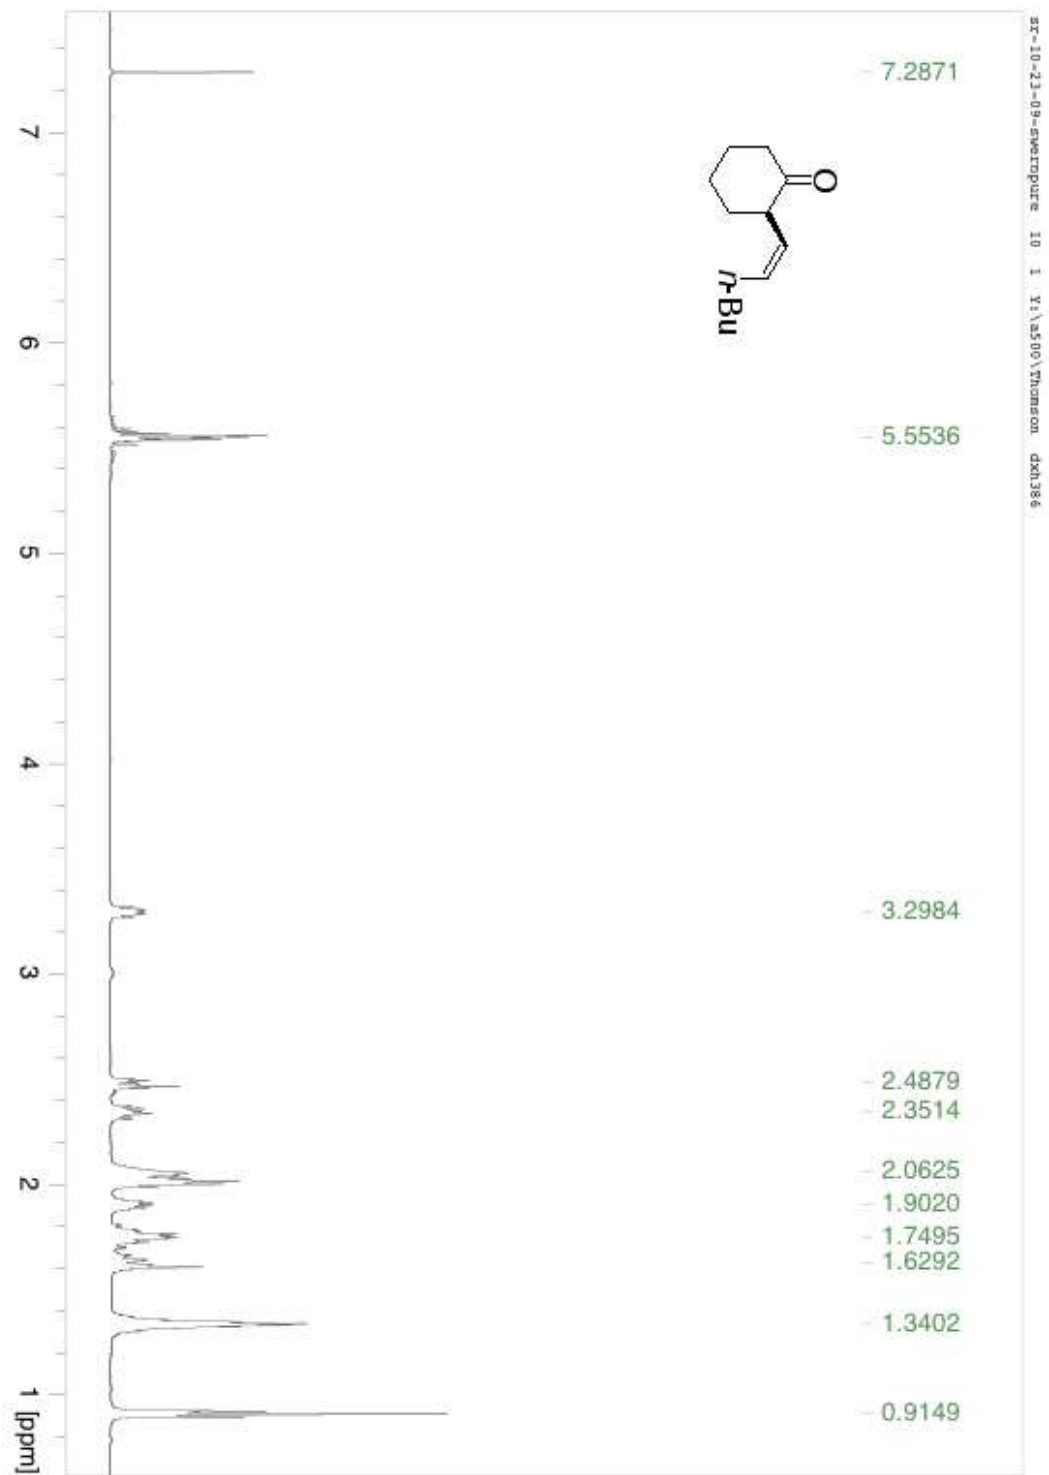

Supporting Information

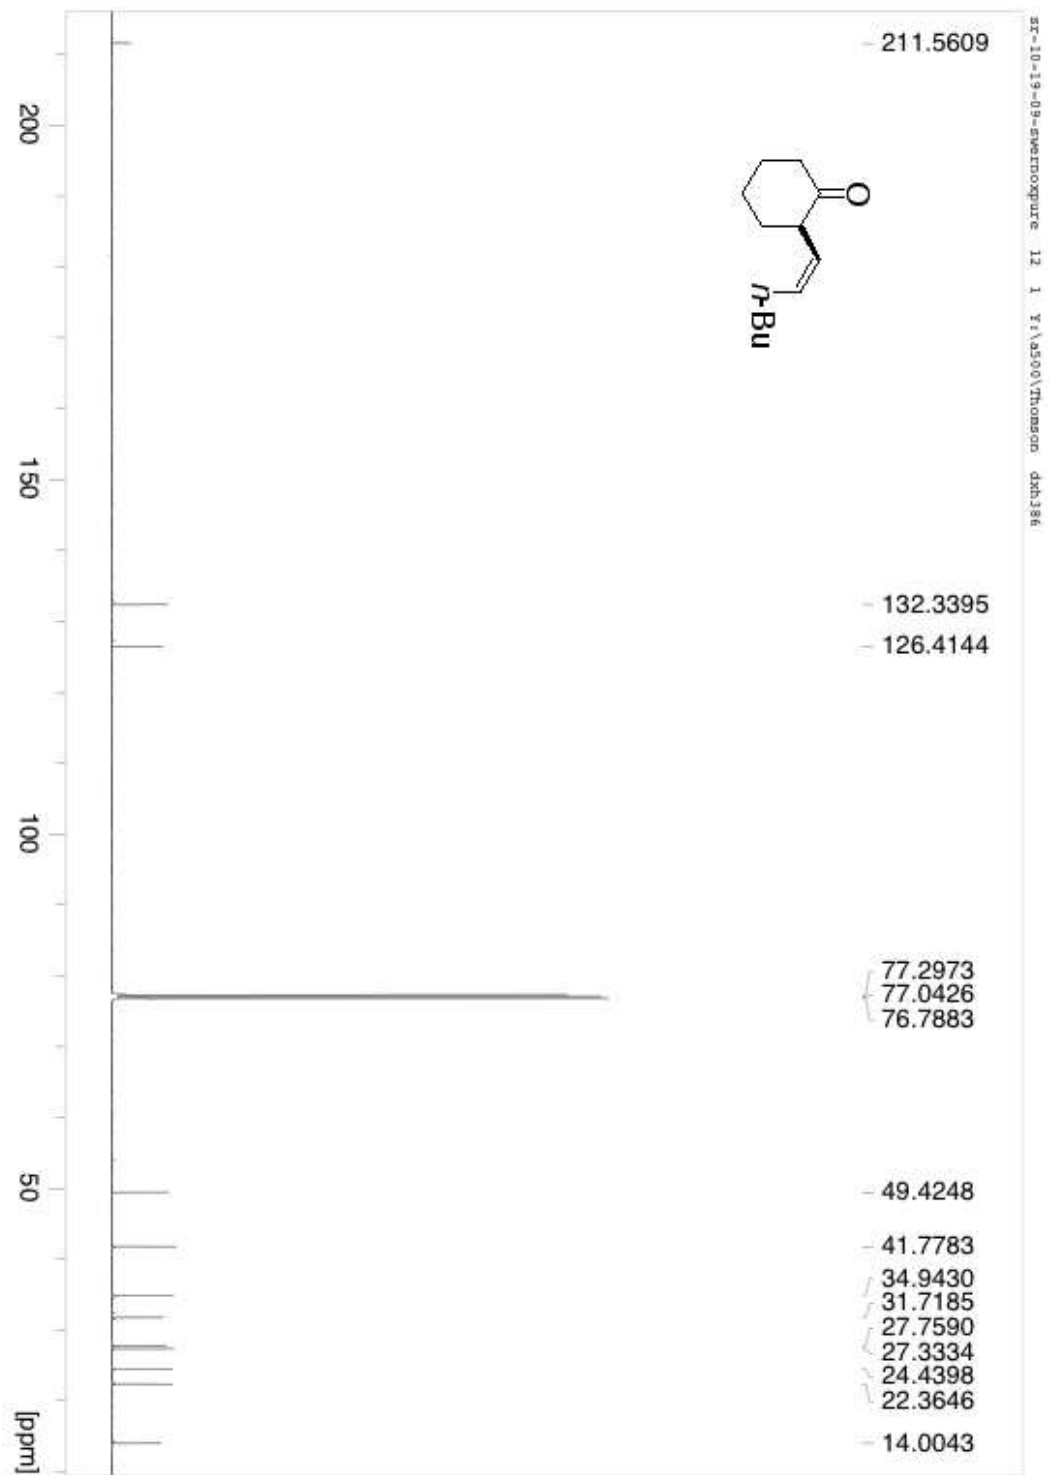

Supporting Information

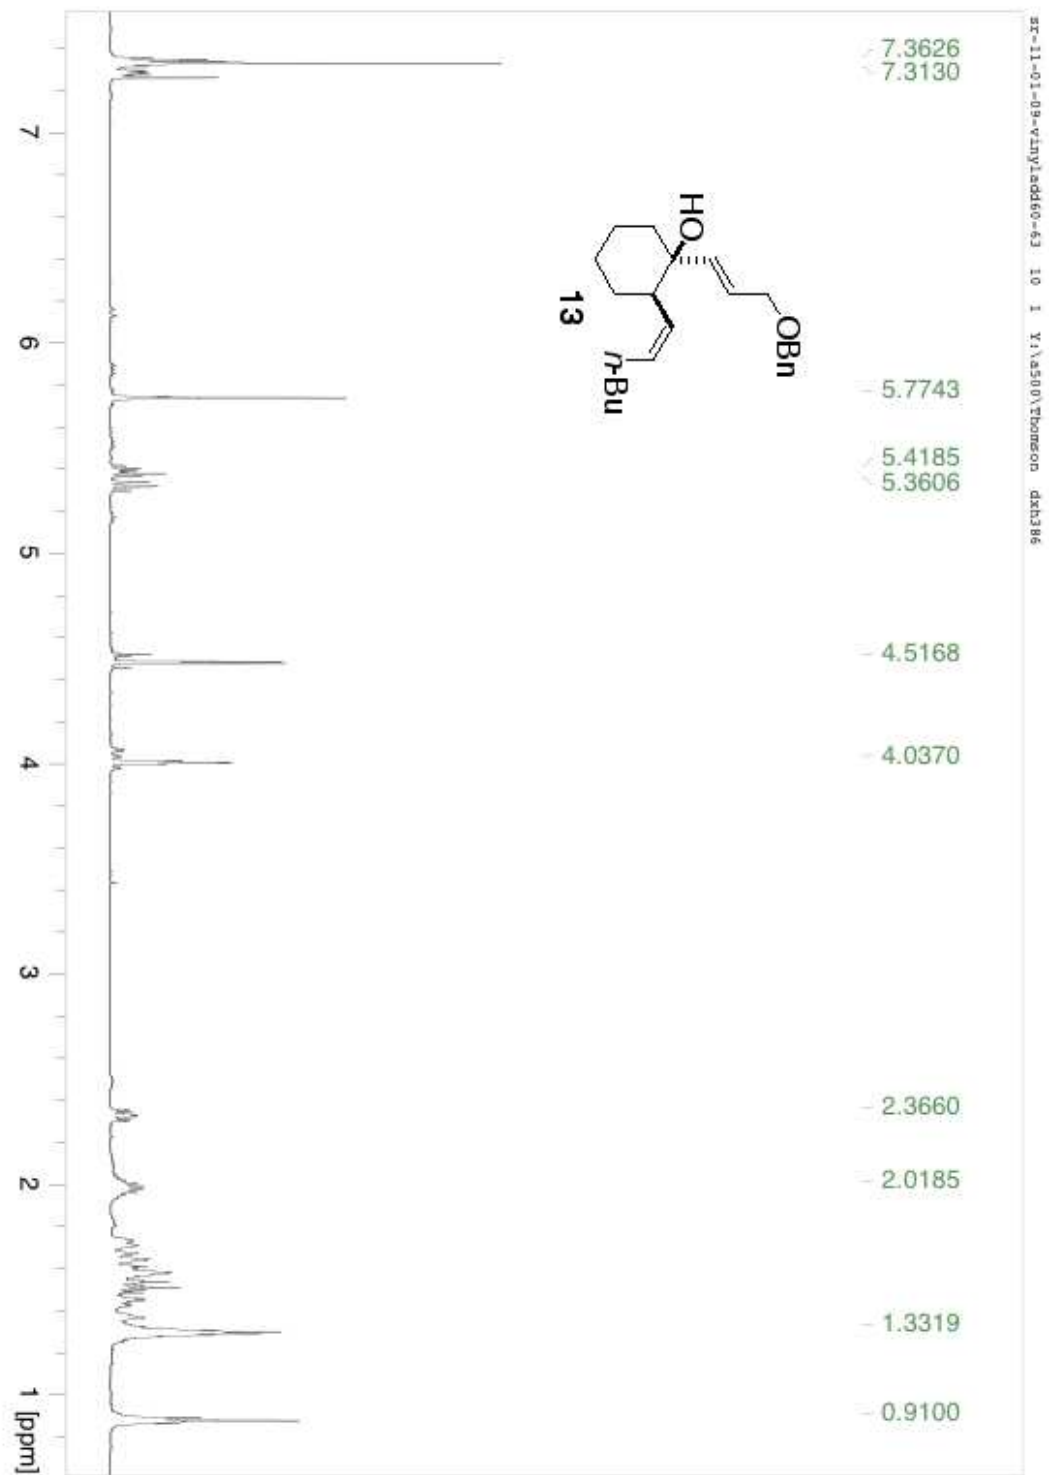

Supporting Information

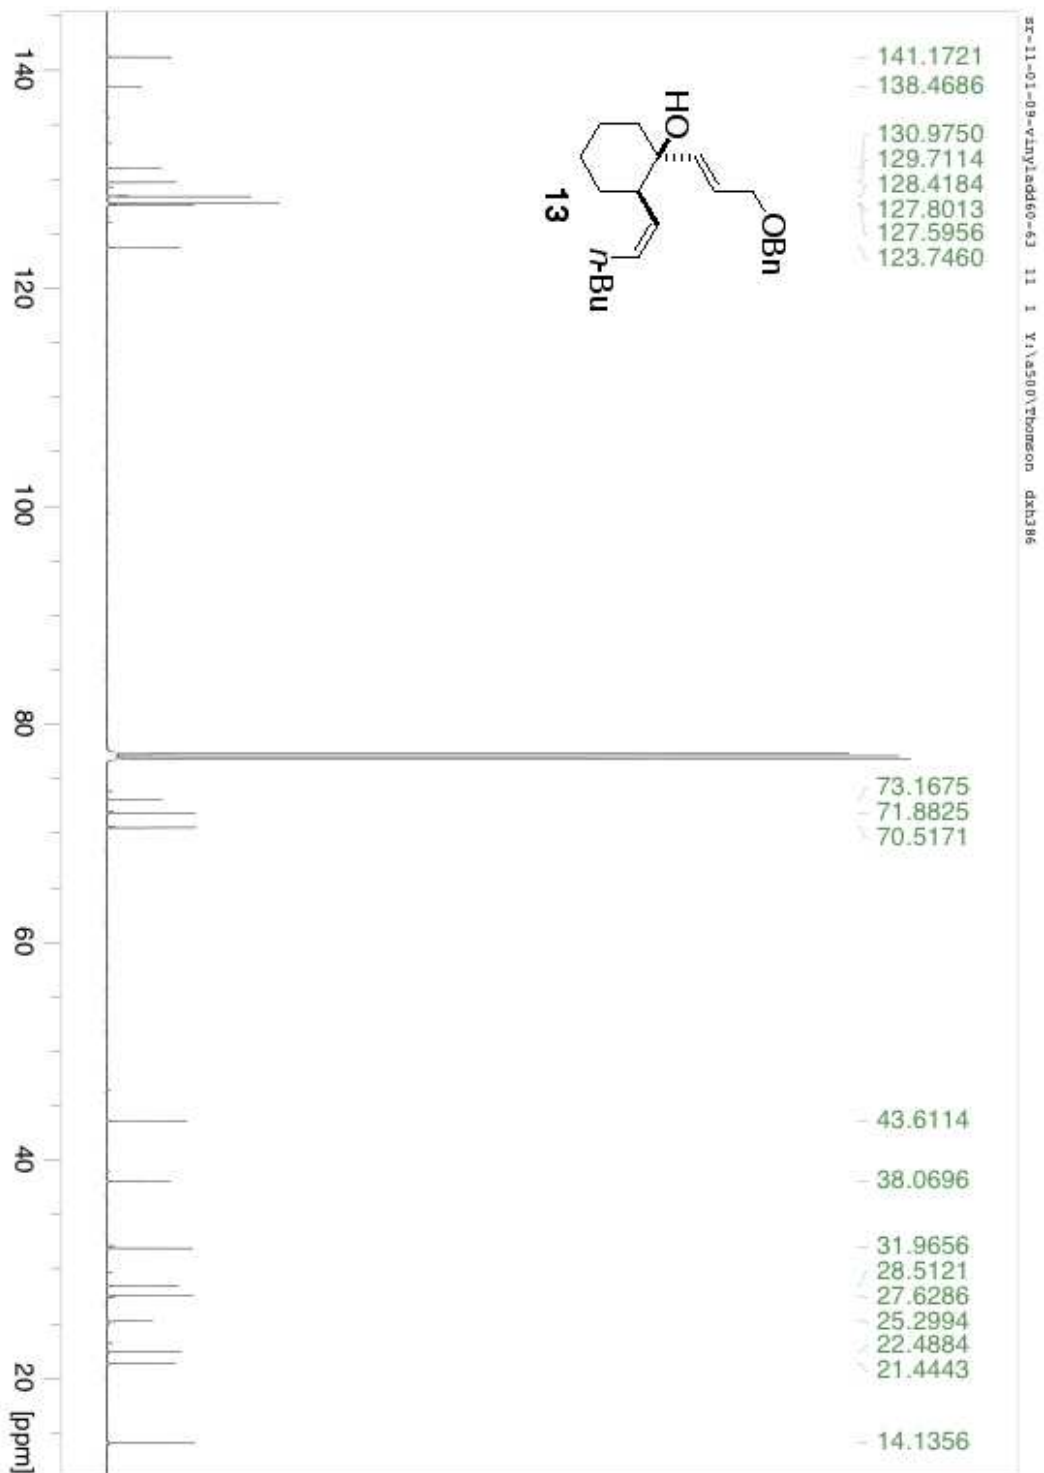

Supporting Information

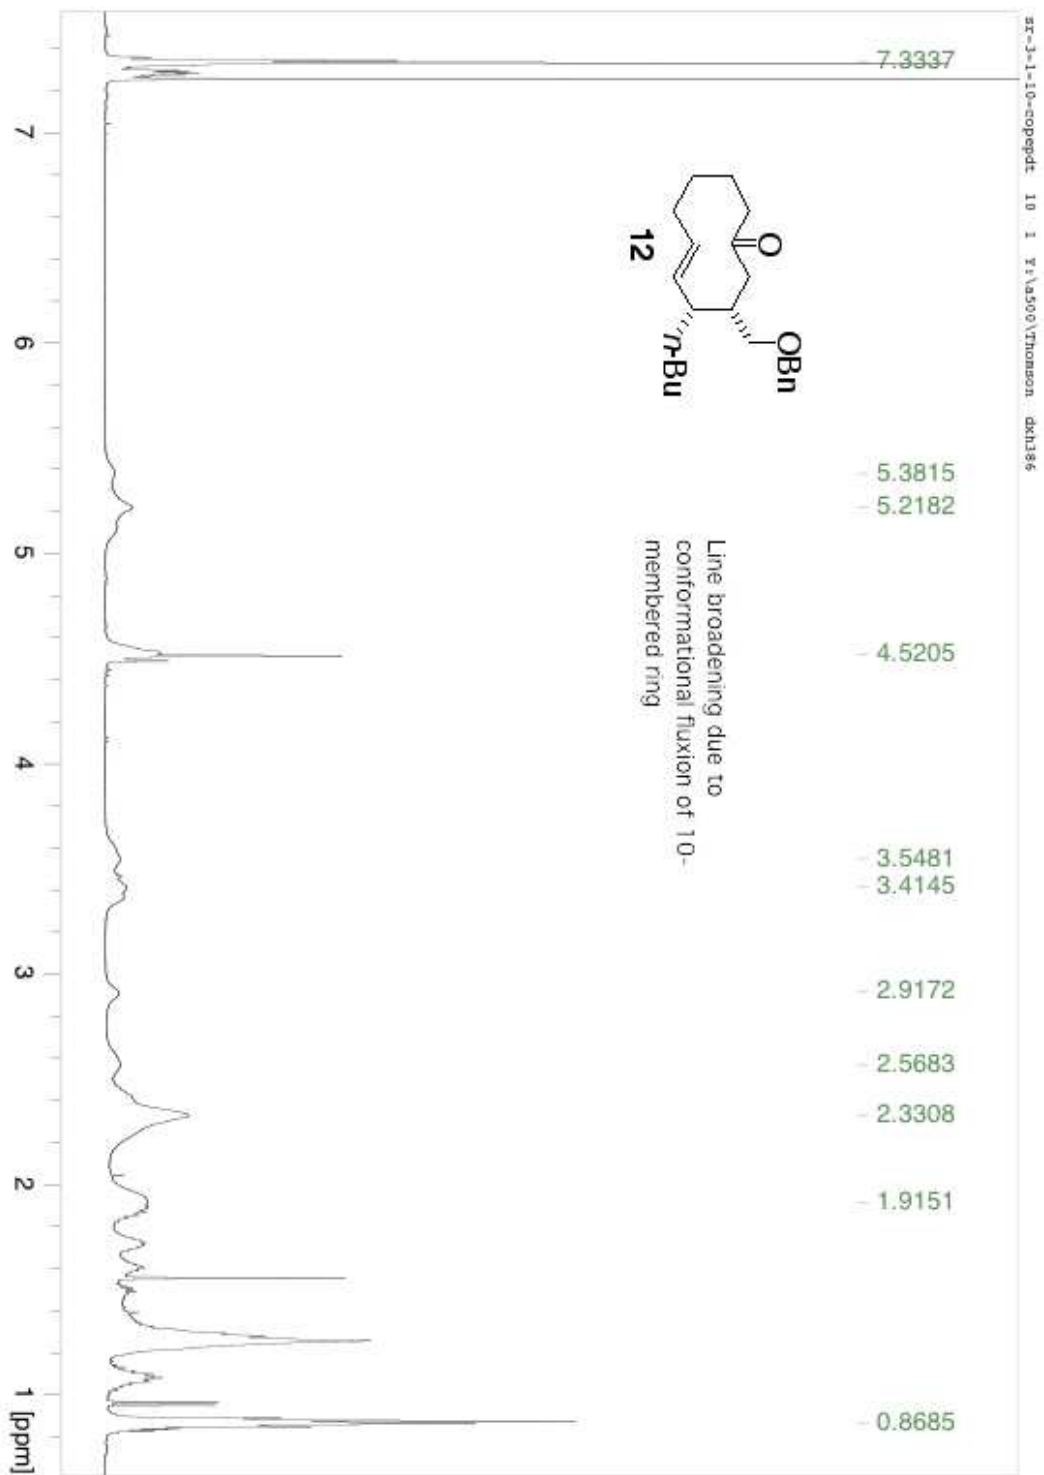

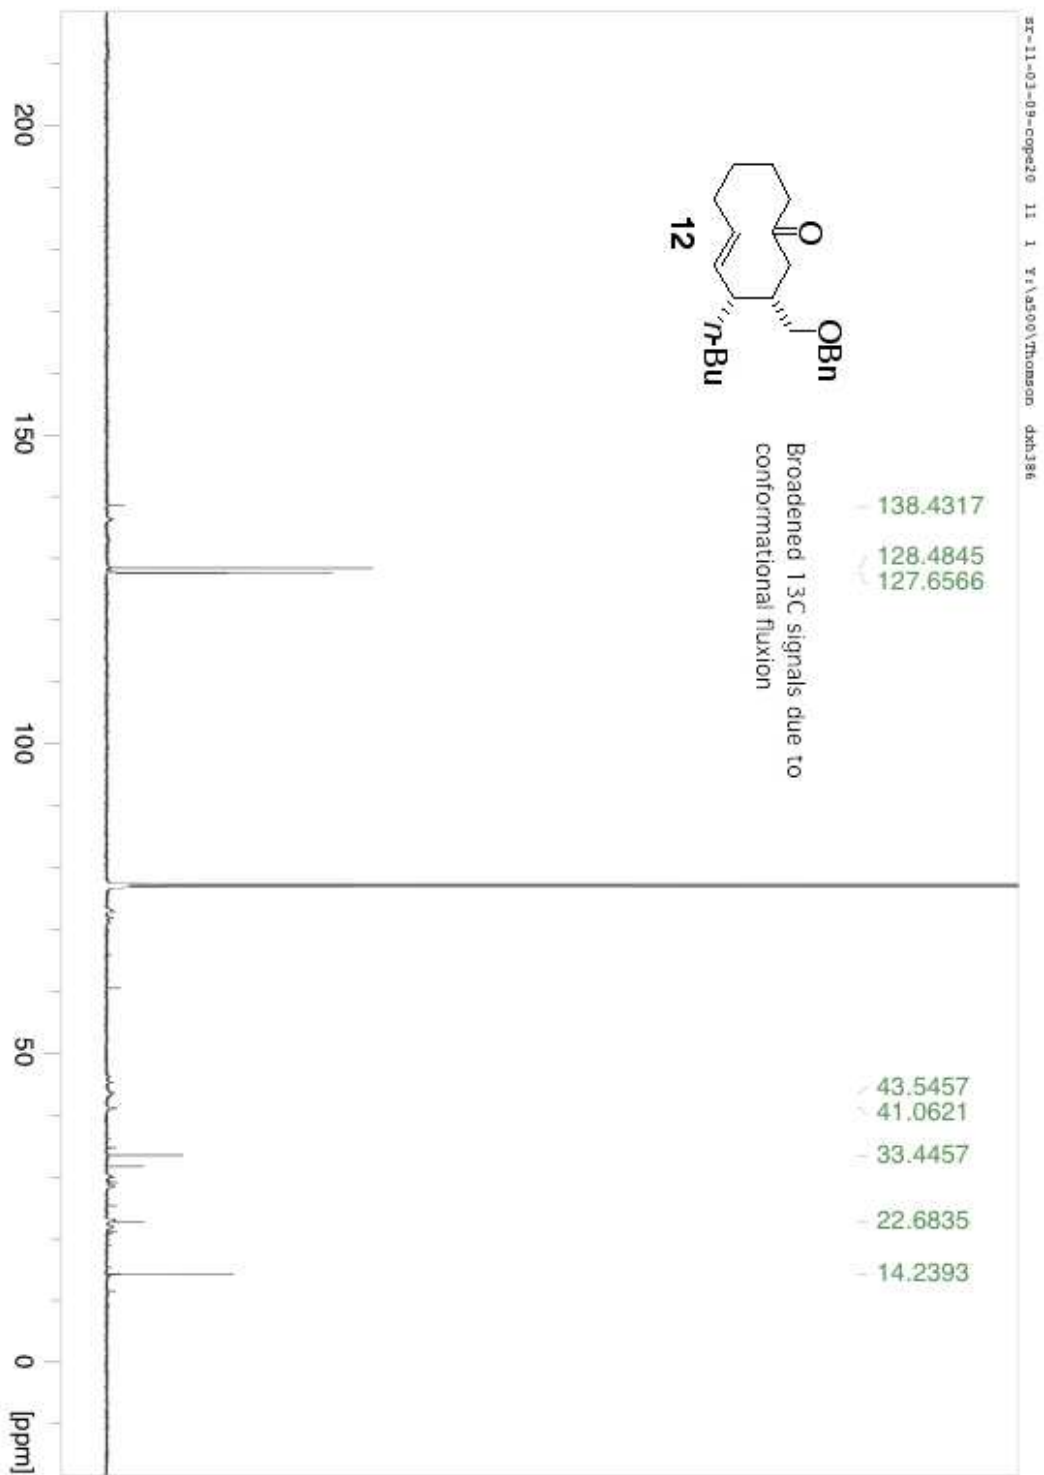

Supporting Information

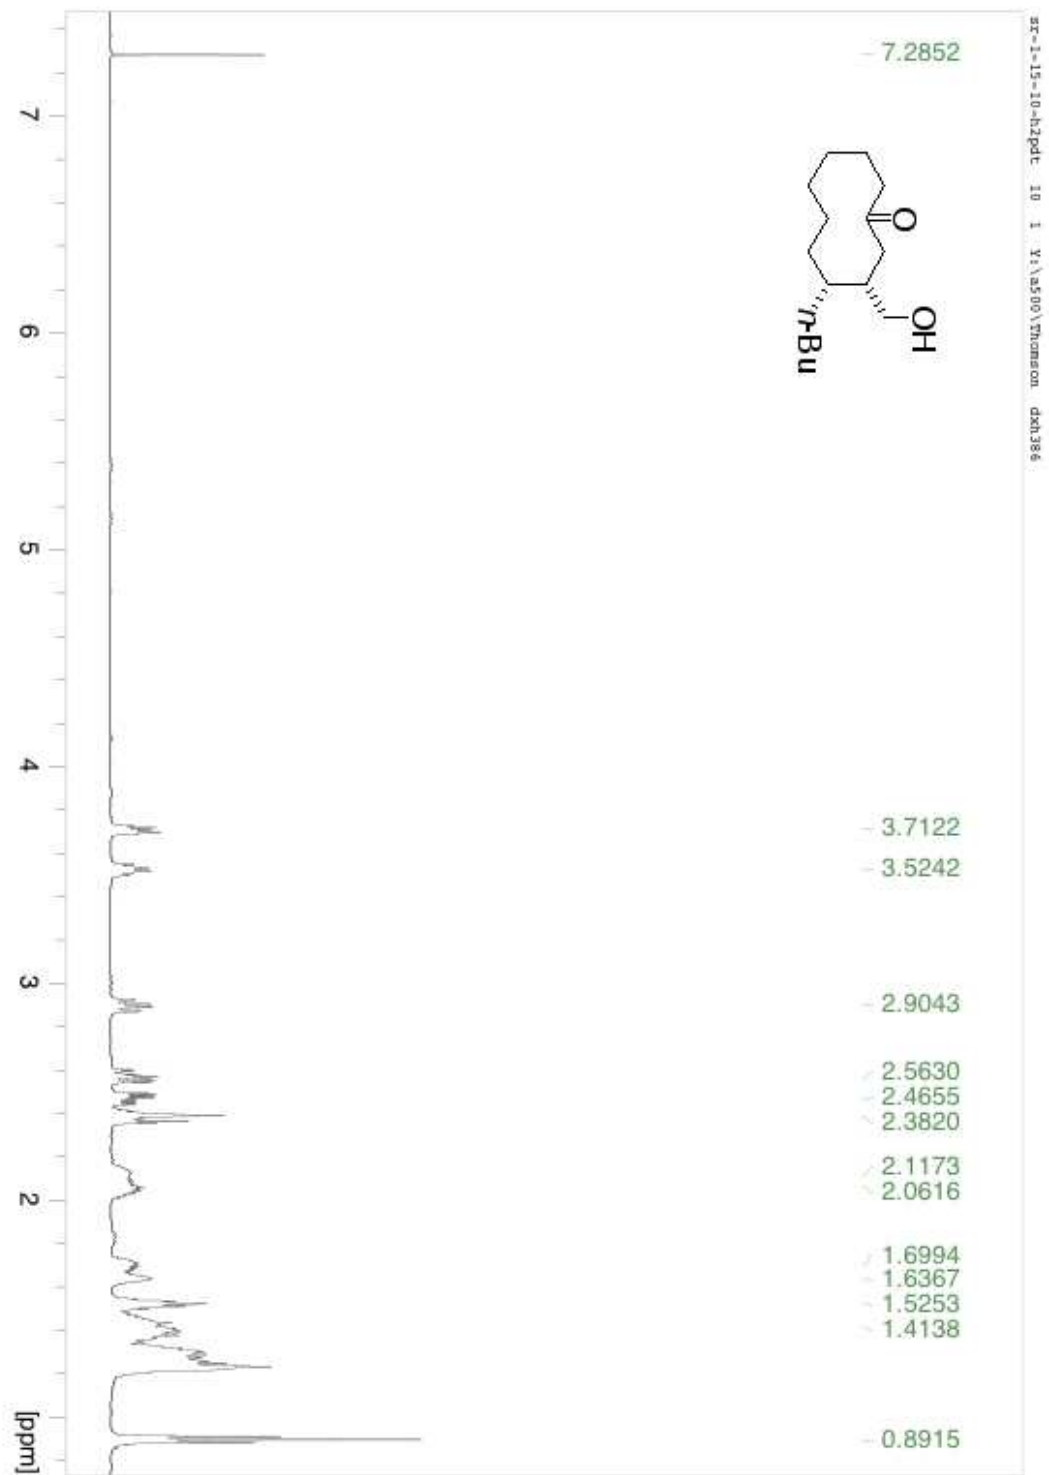



Supporting Information

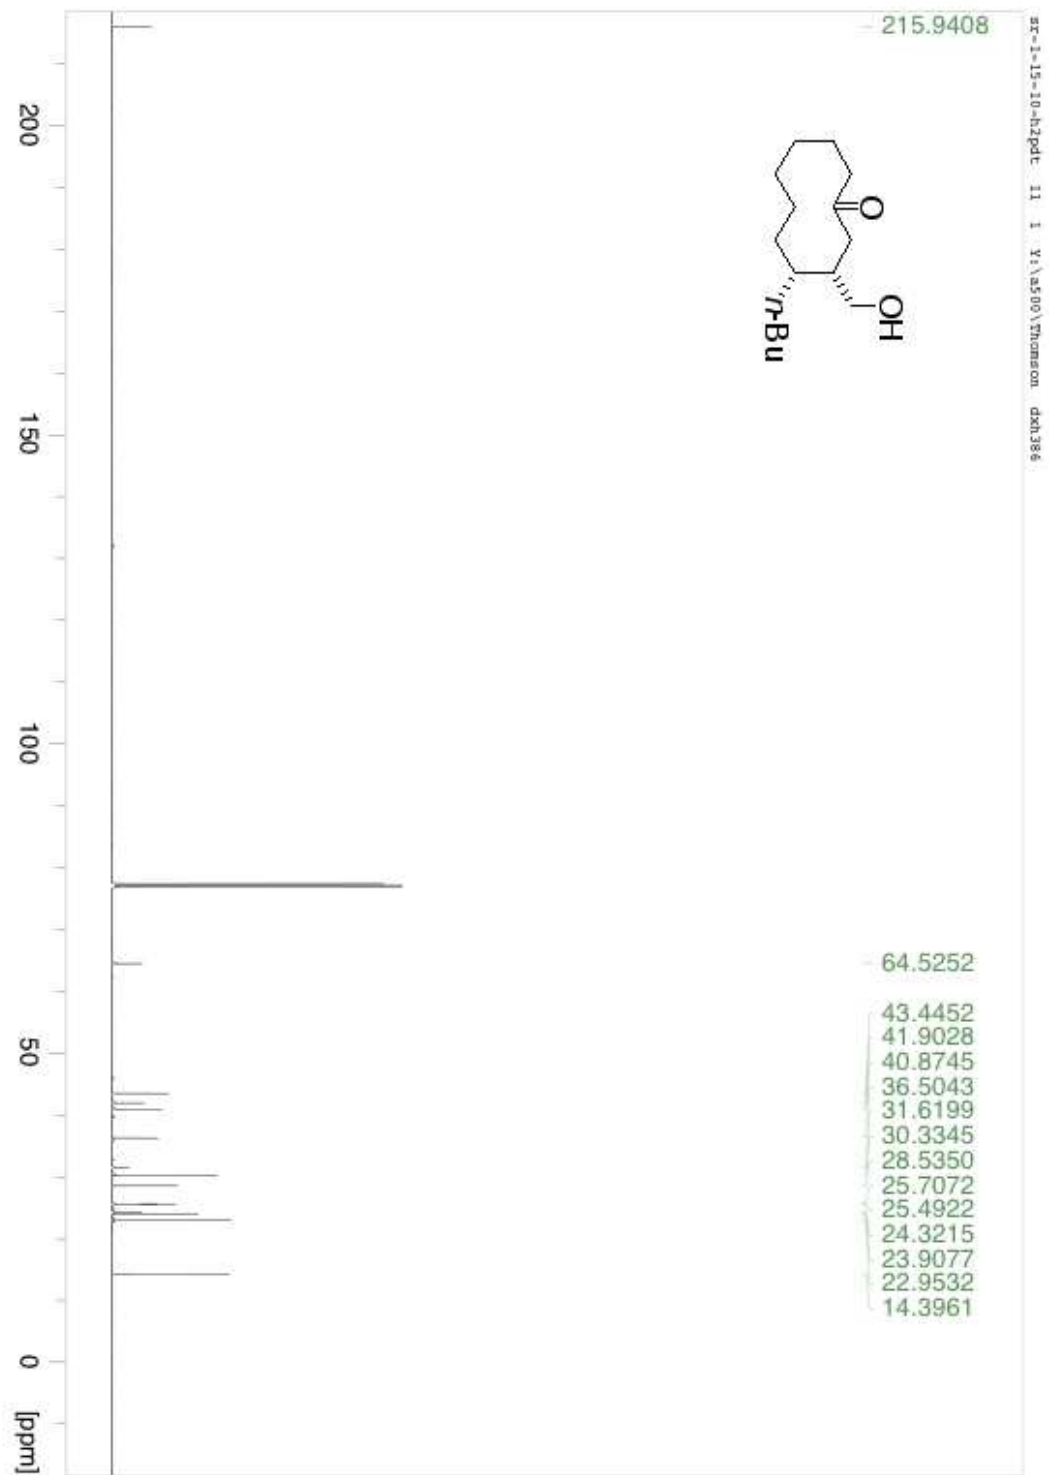

Supporting Information

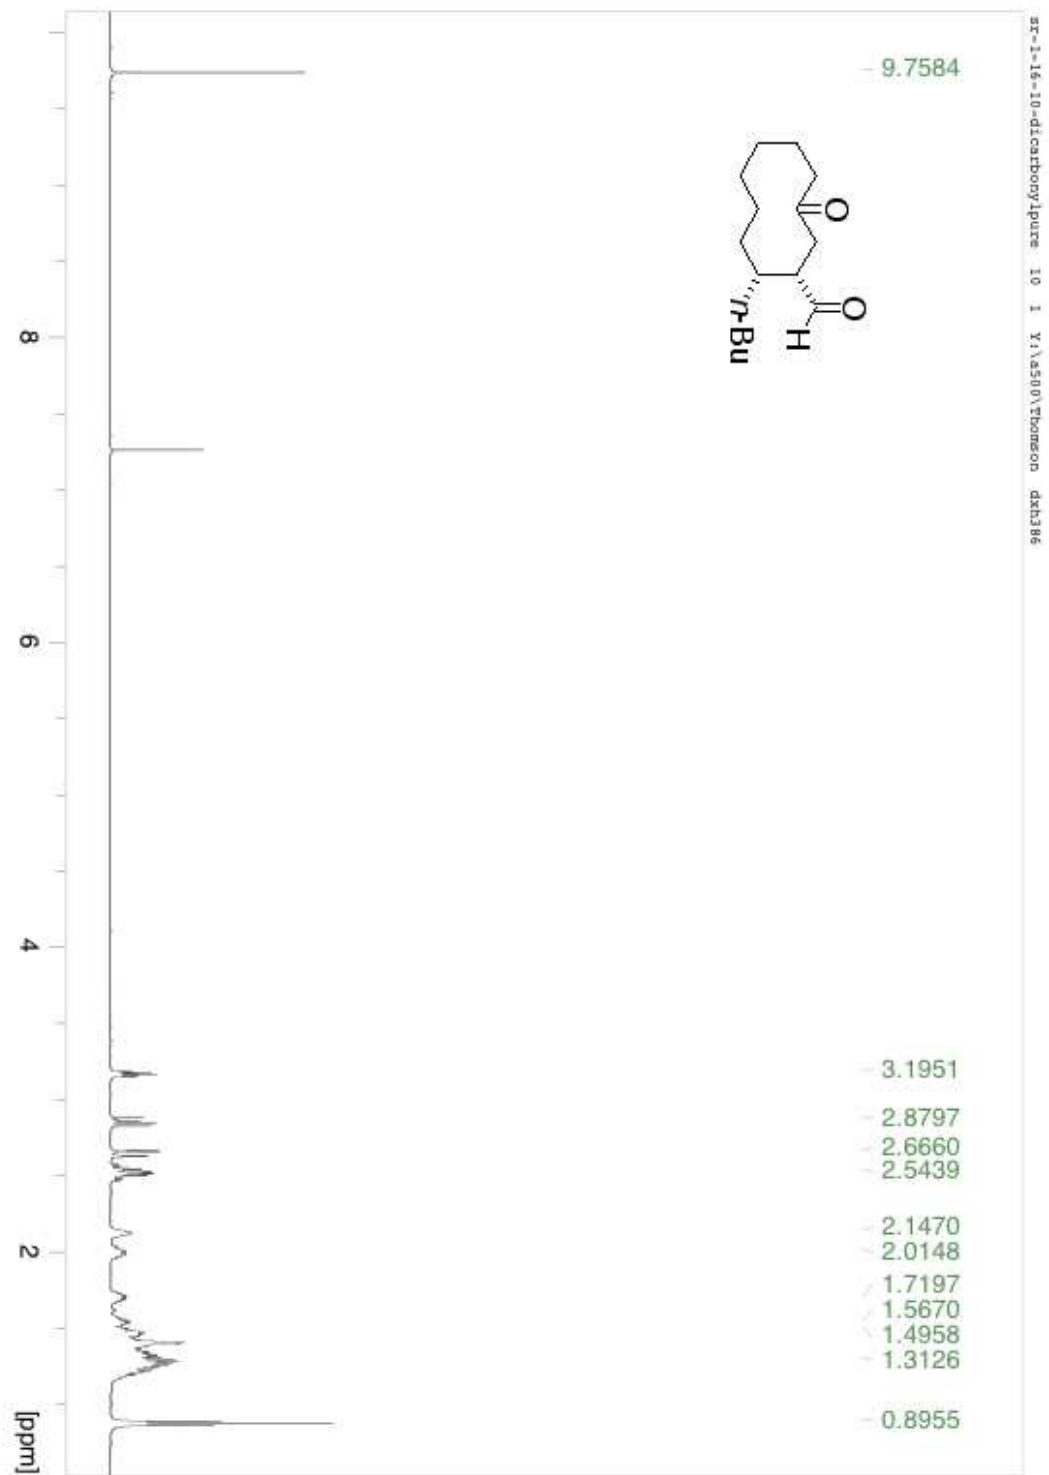

Supporting Information

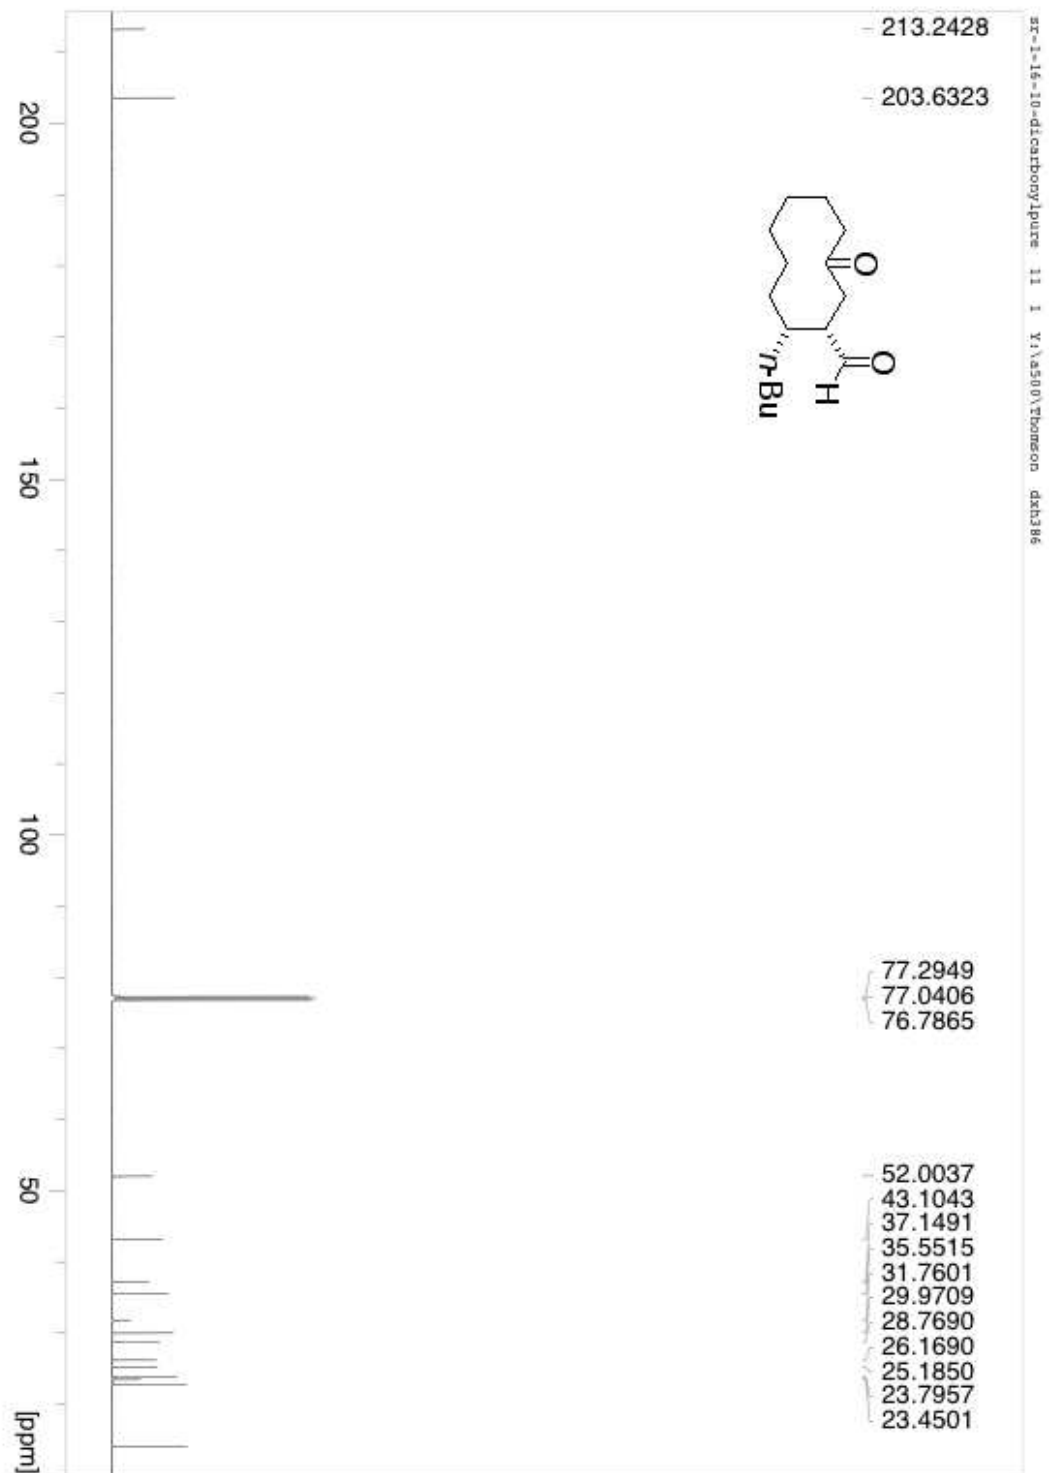

Supporting Information

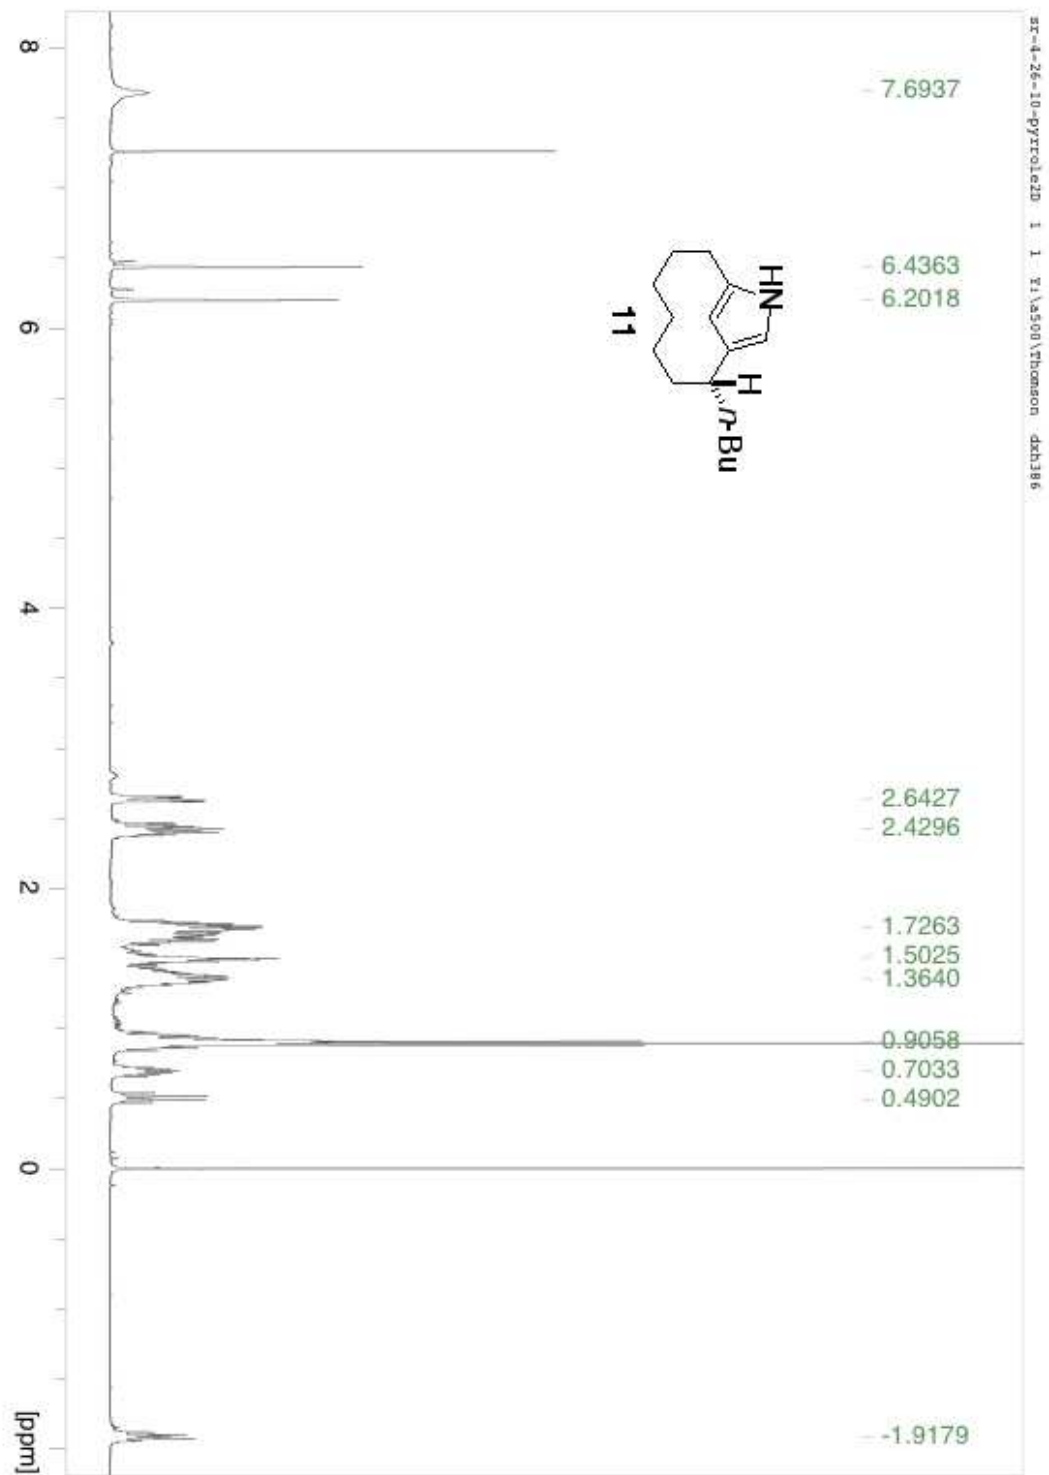

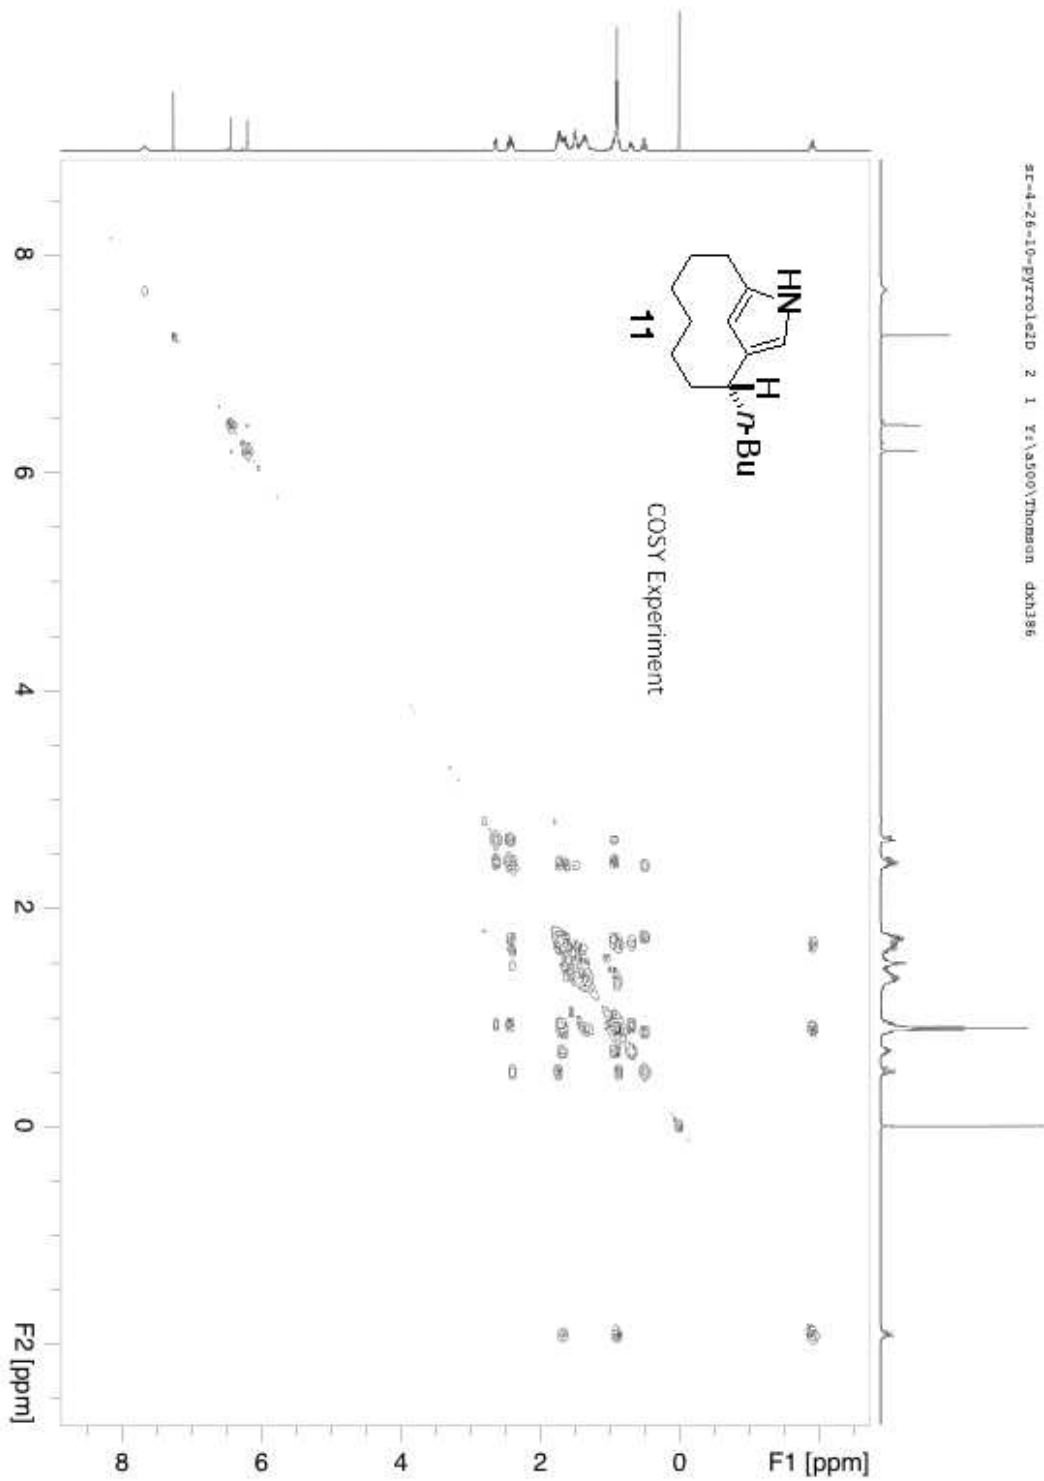

Supporting Information

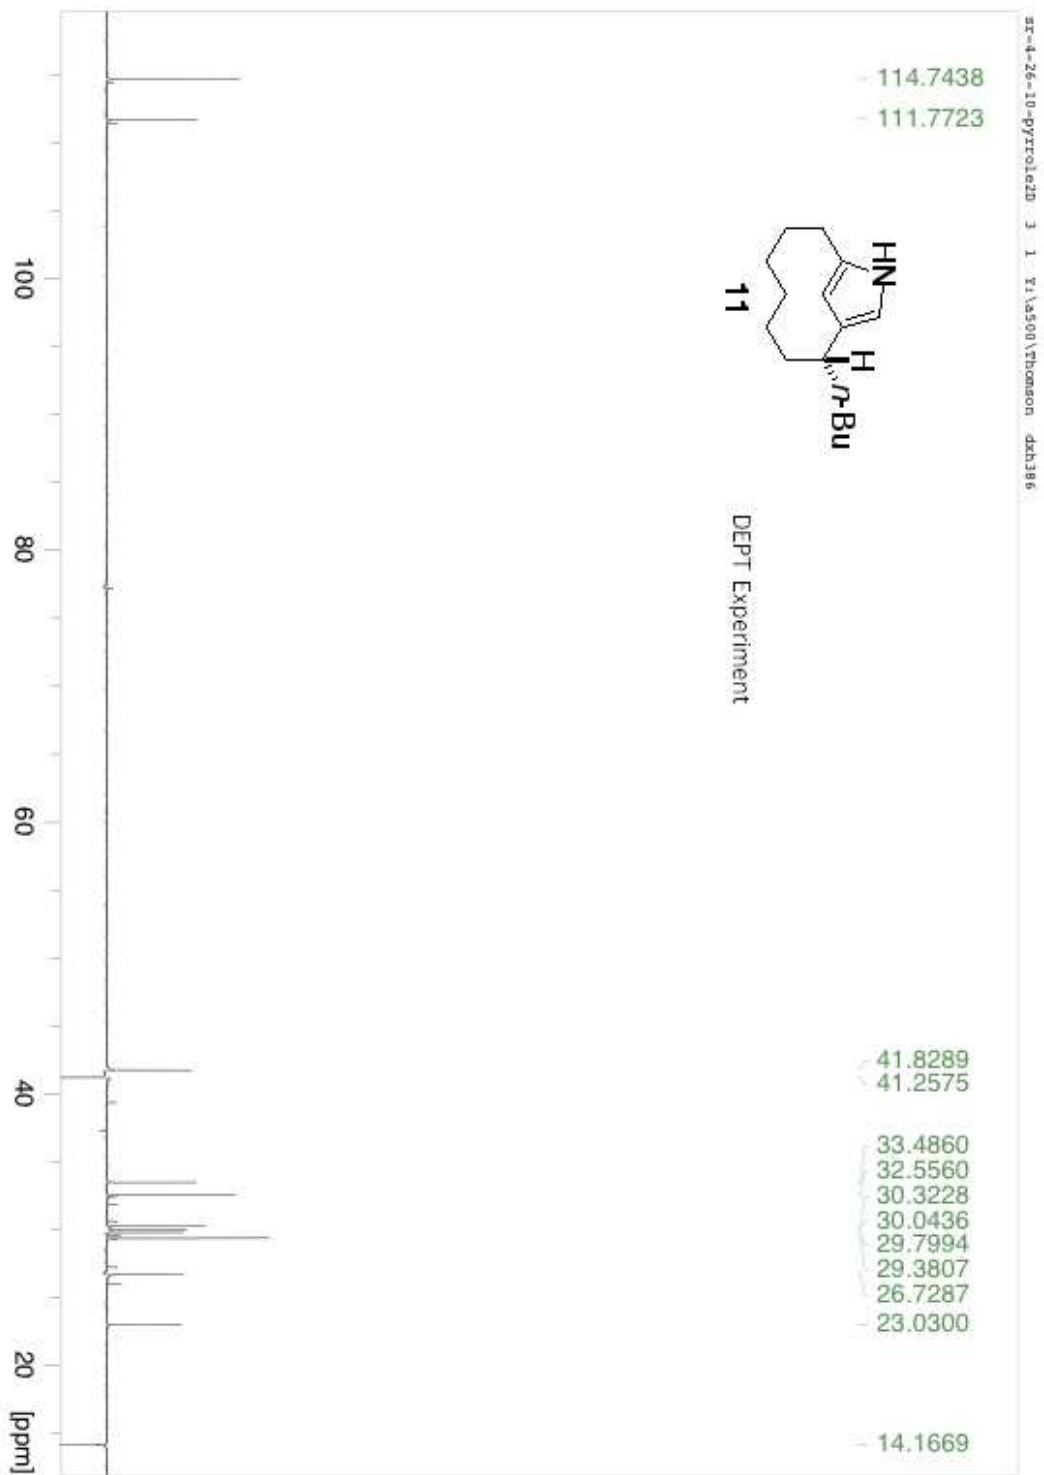

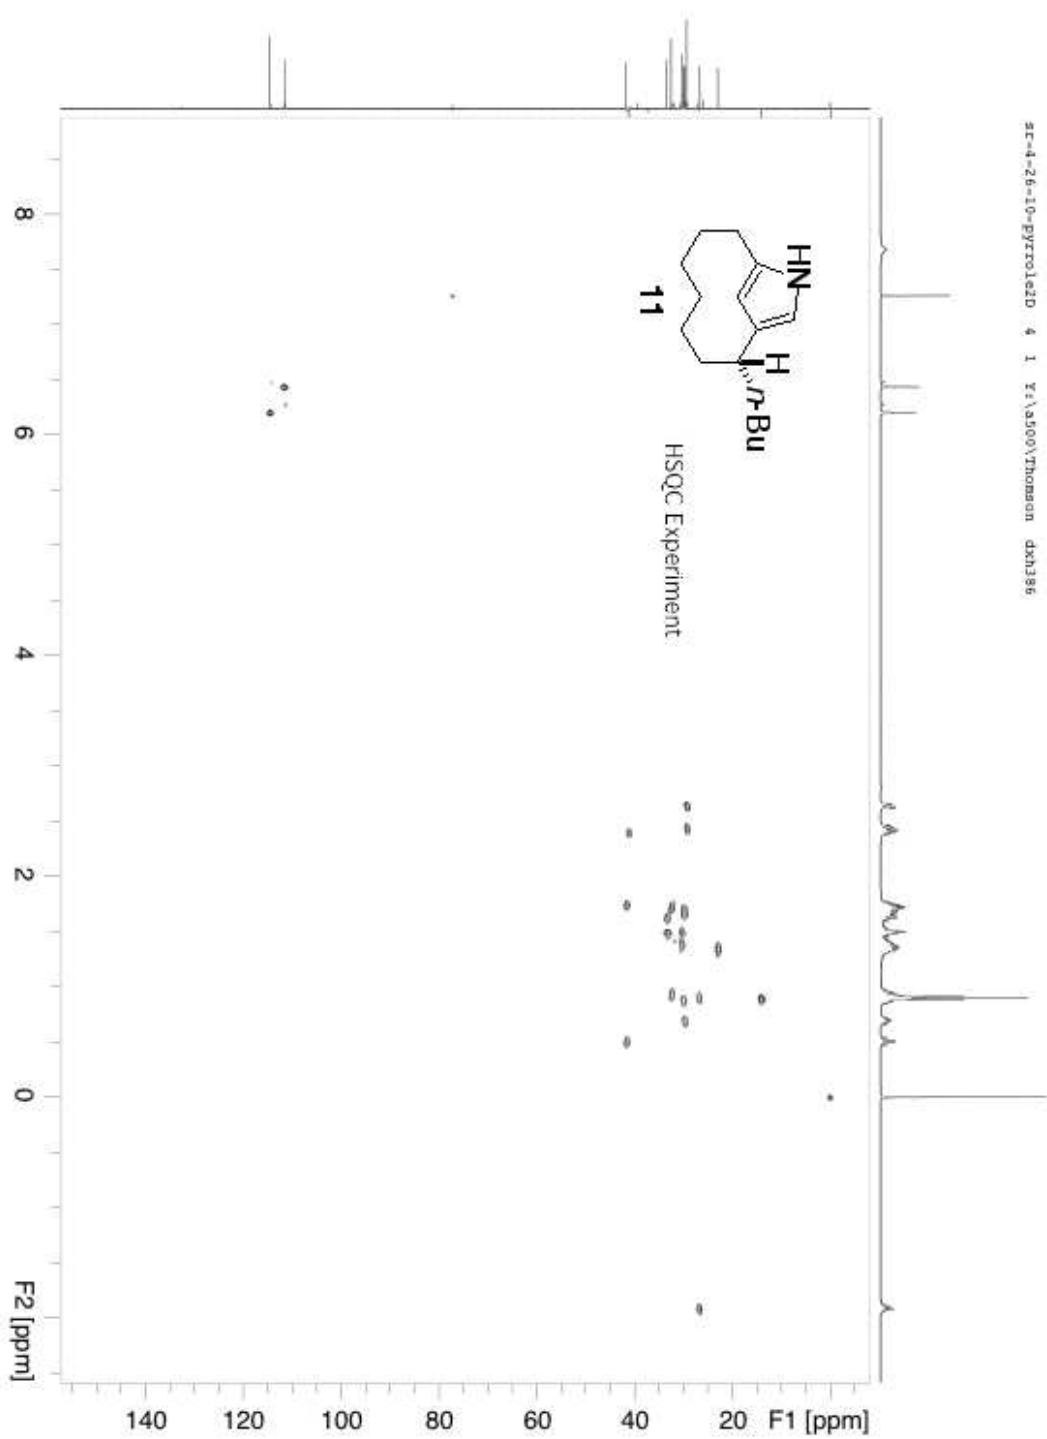

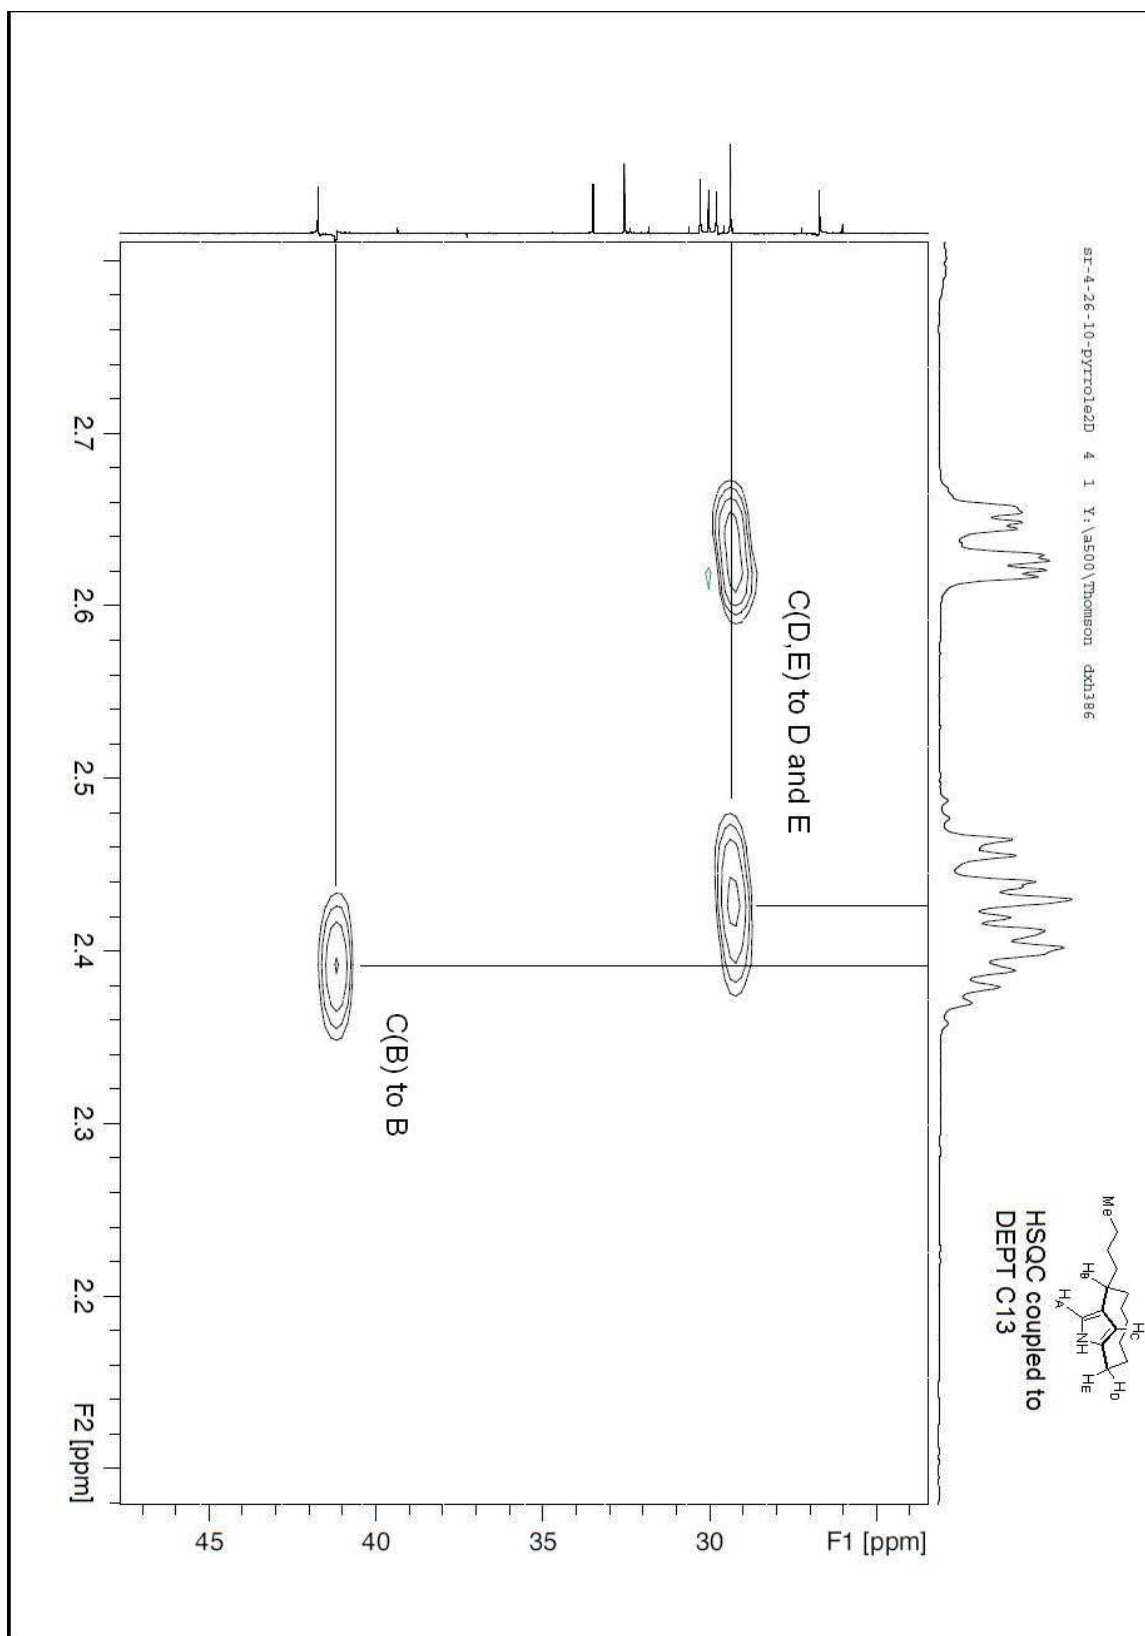



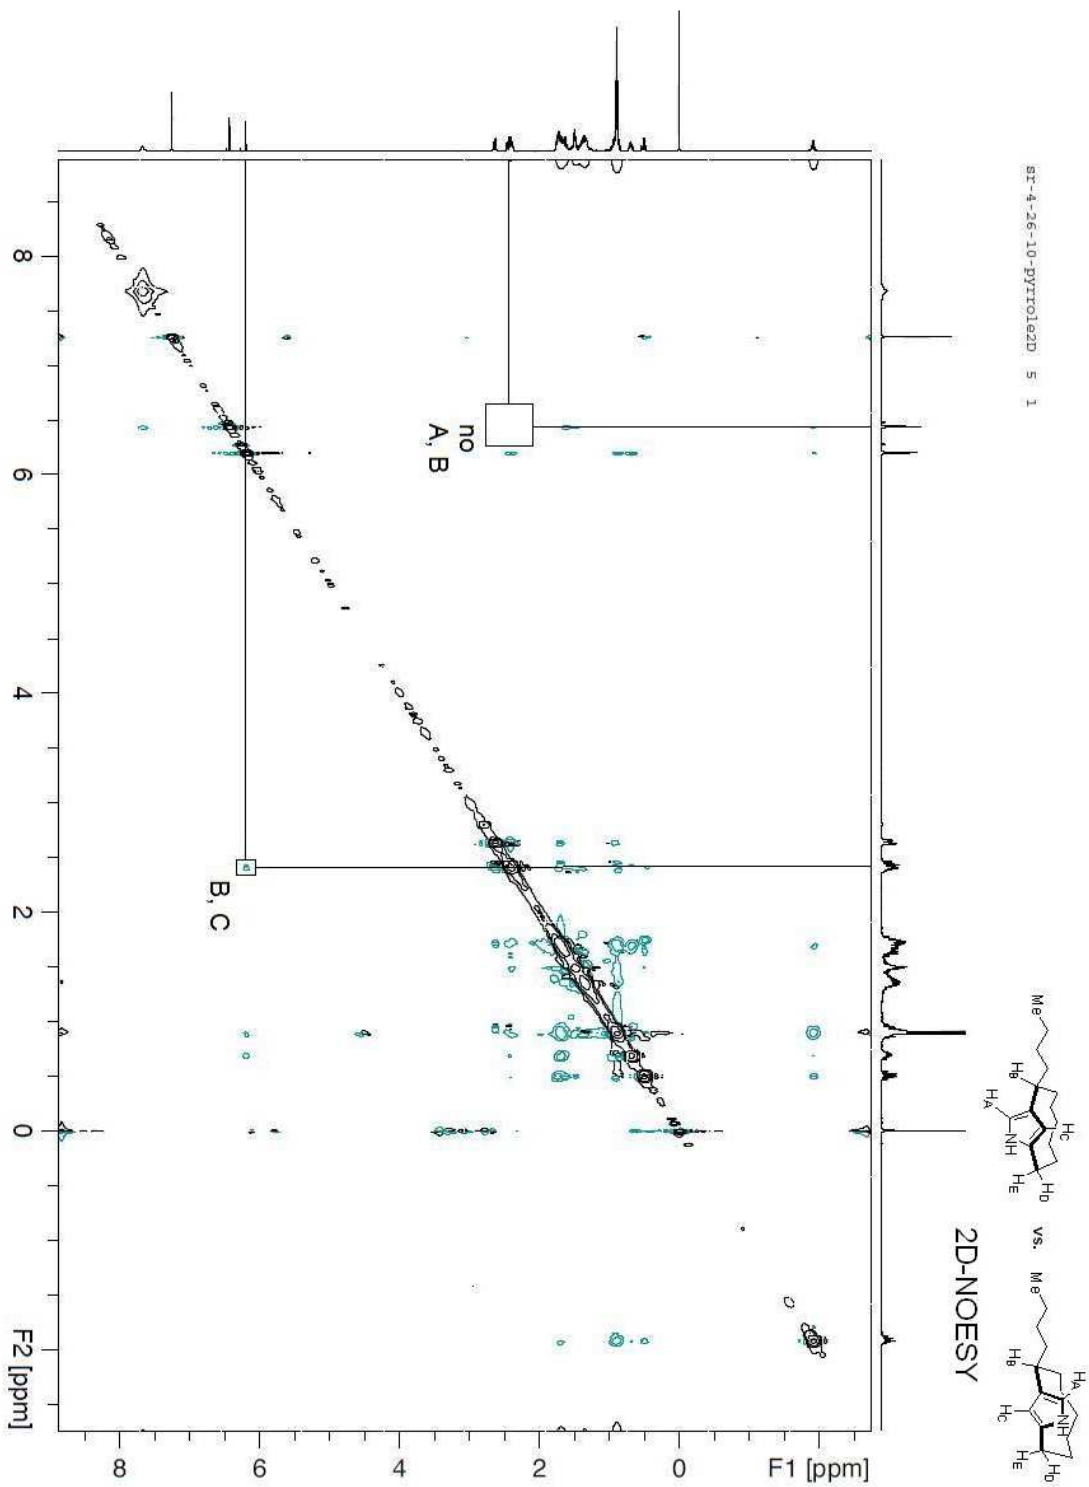

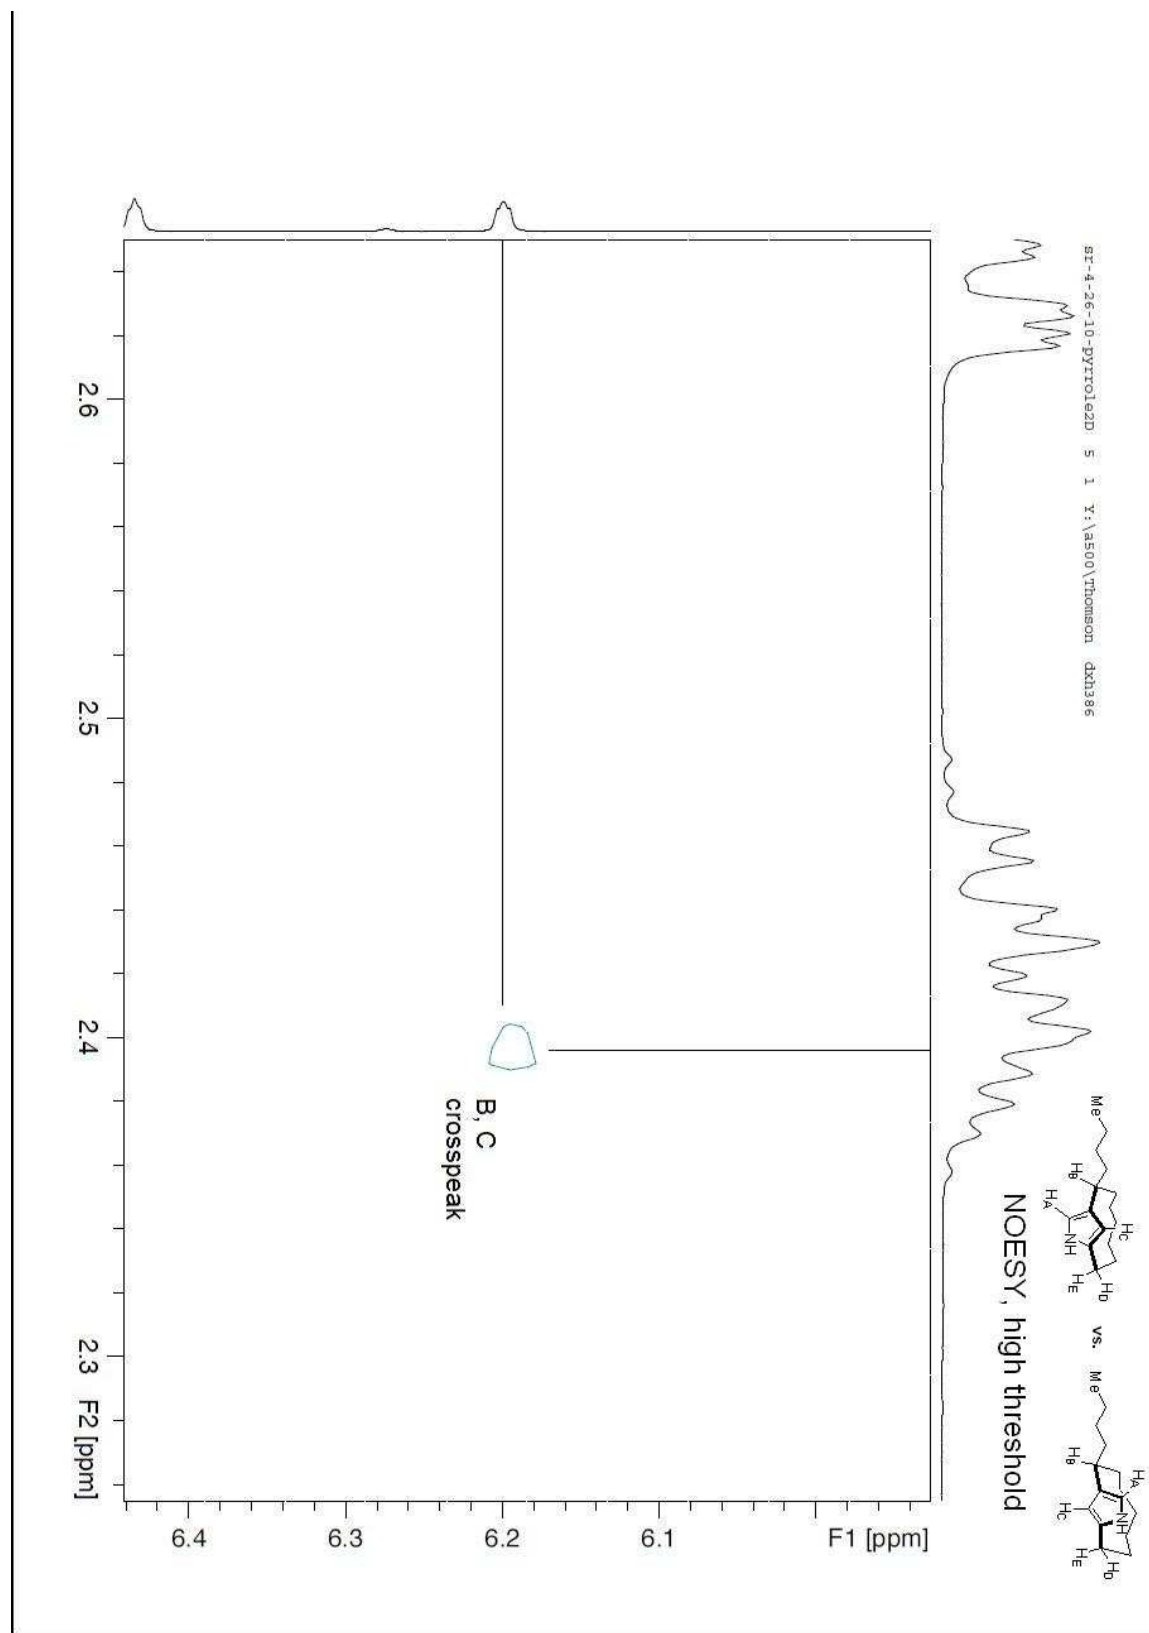

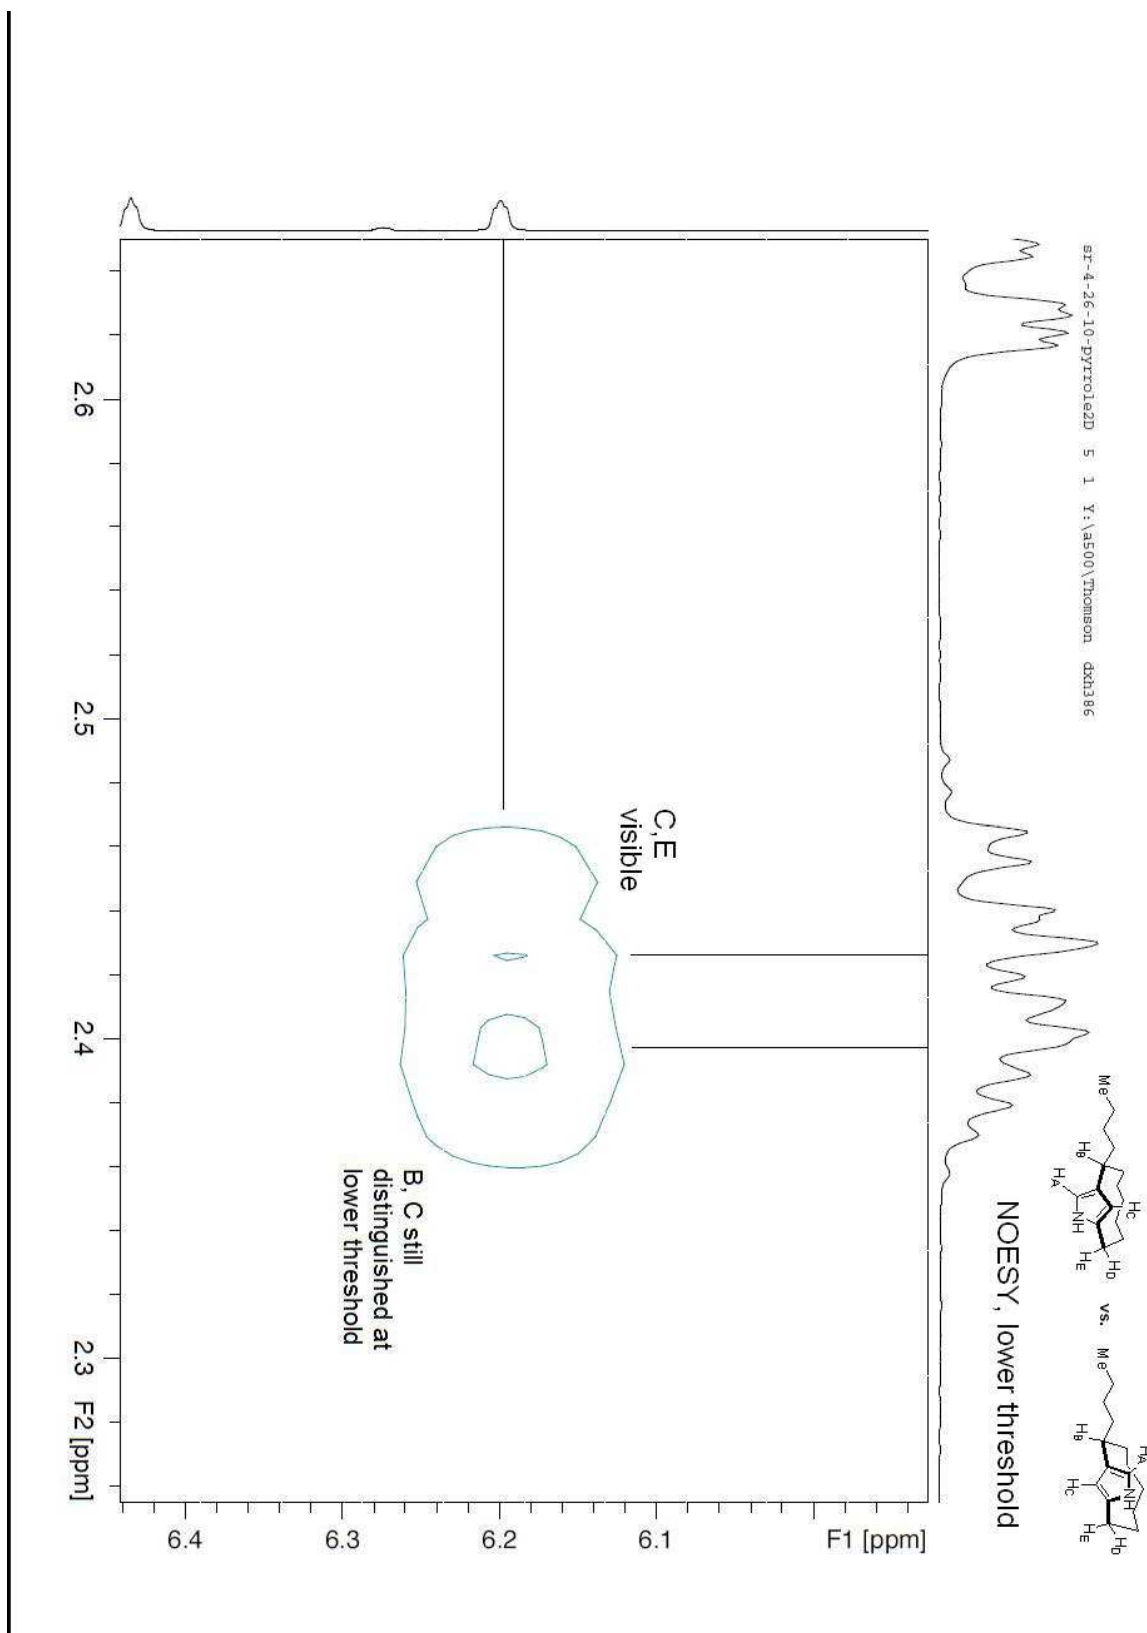

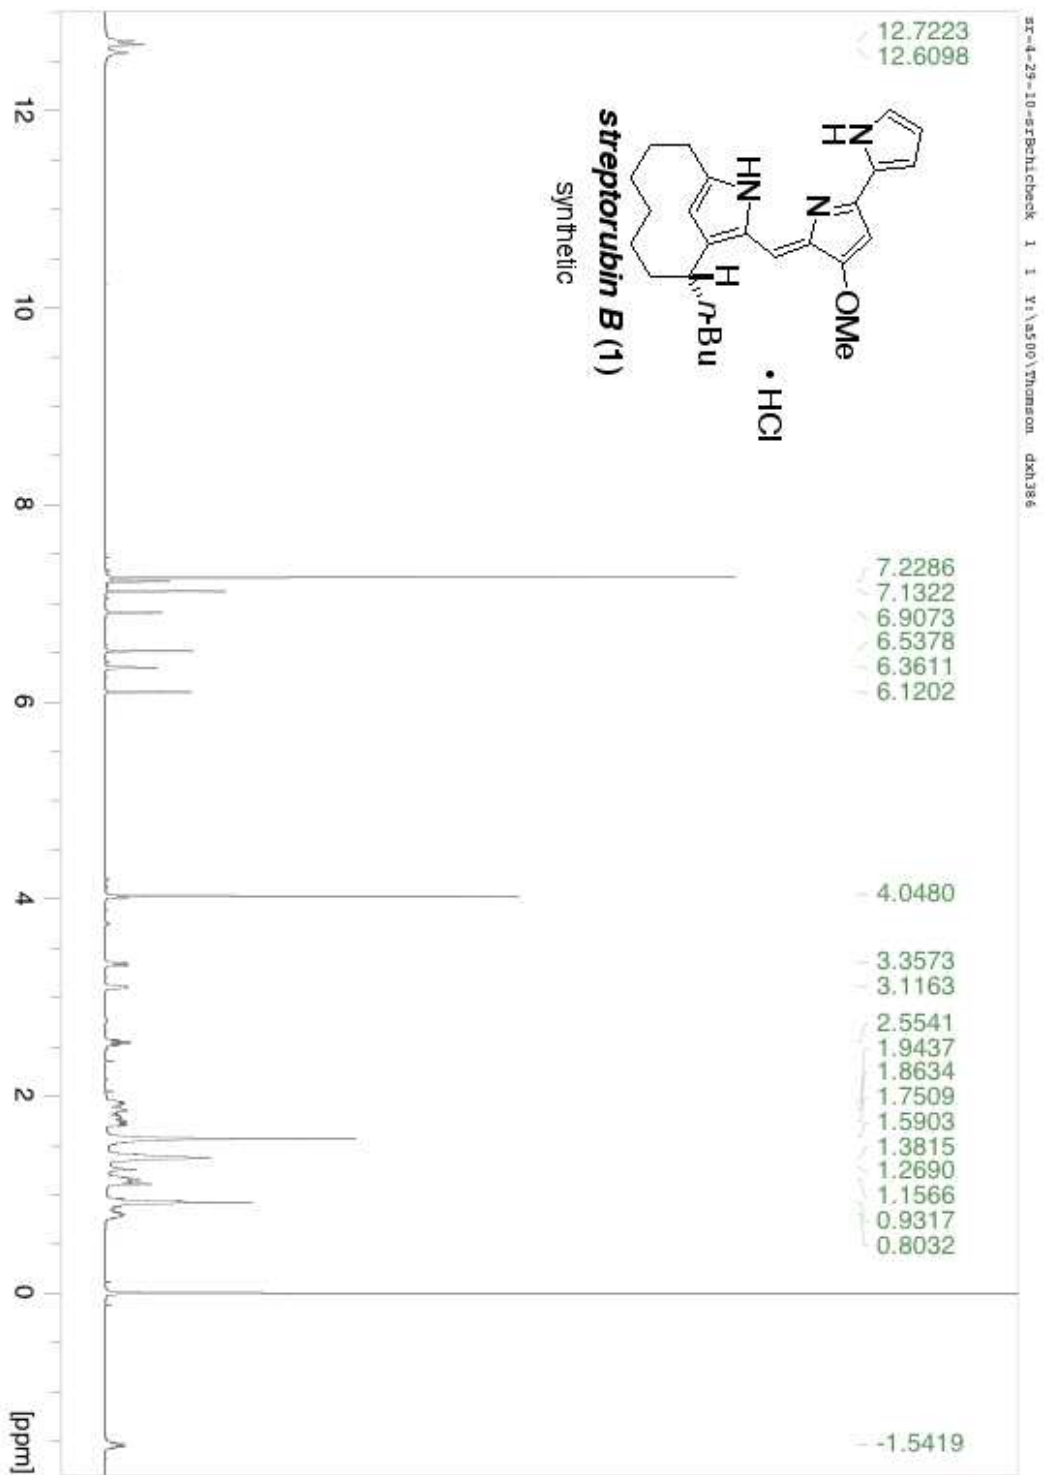

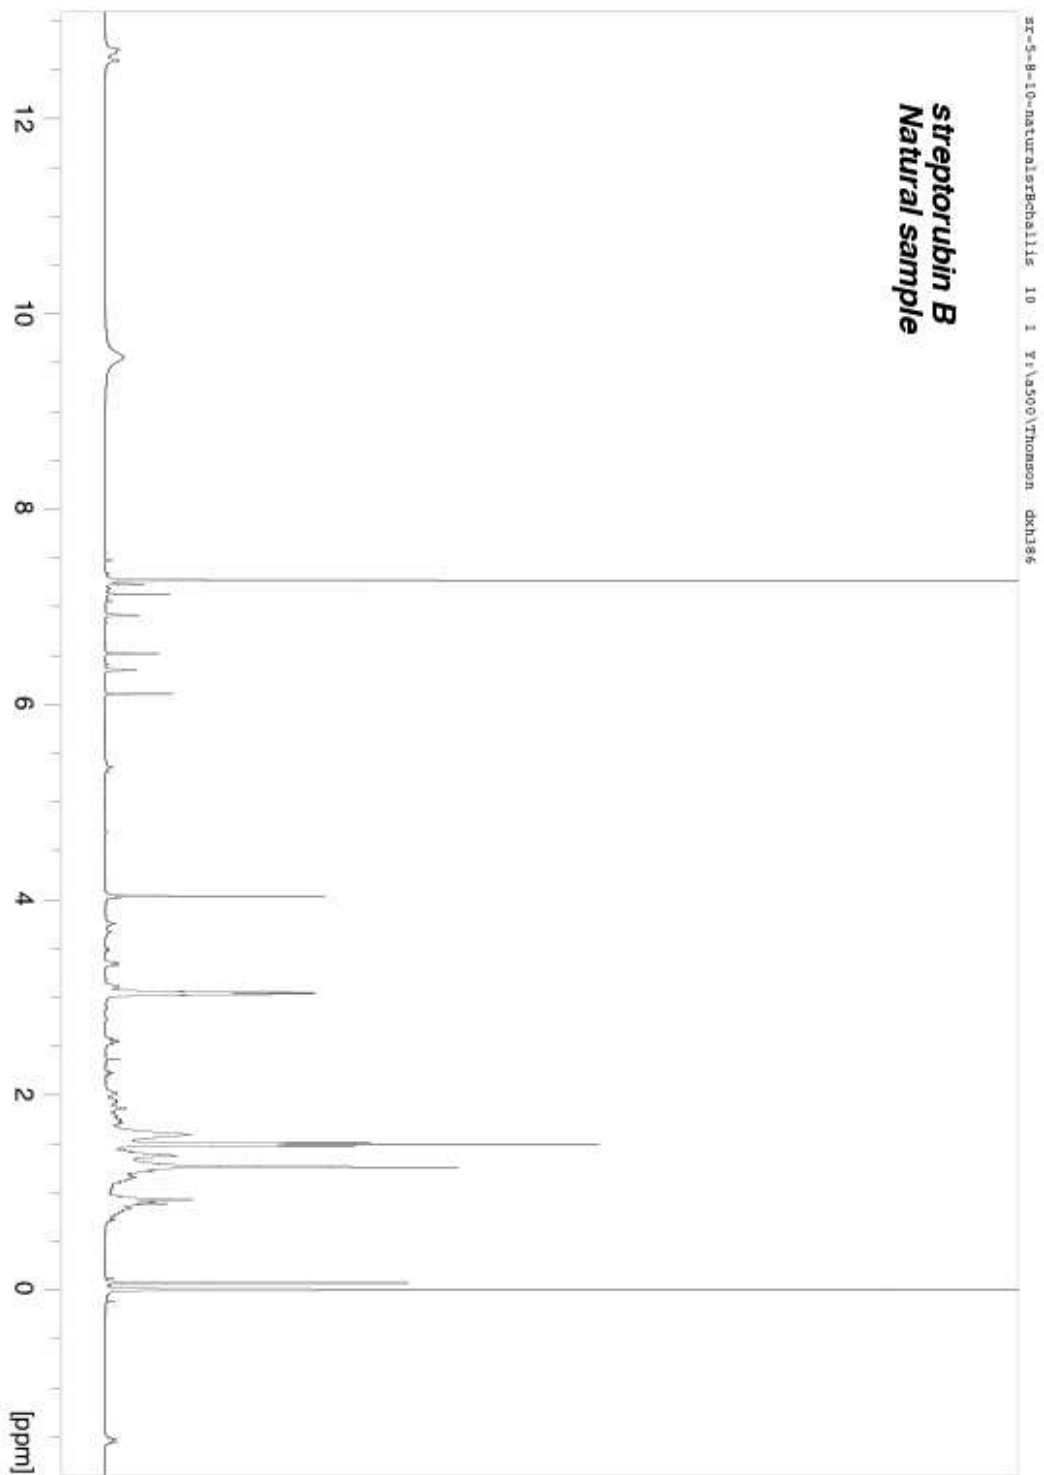

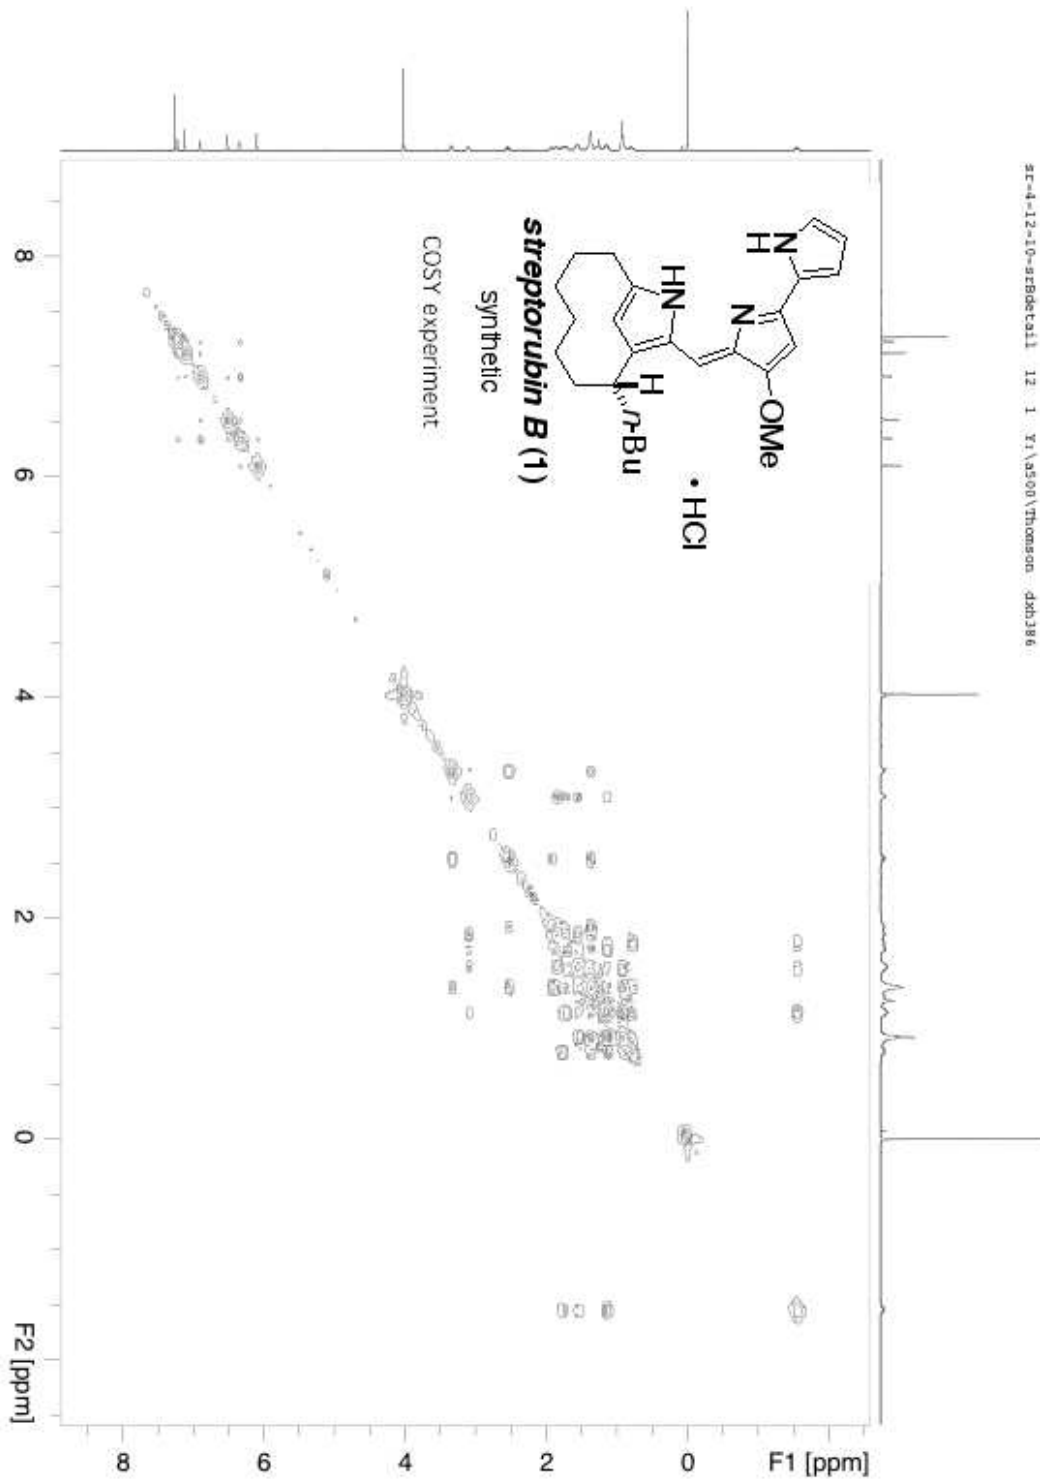

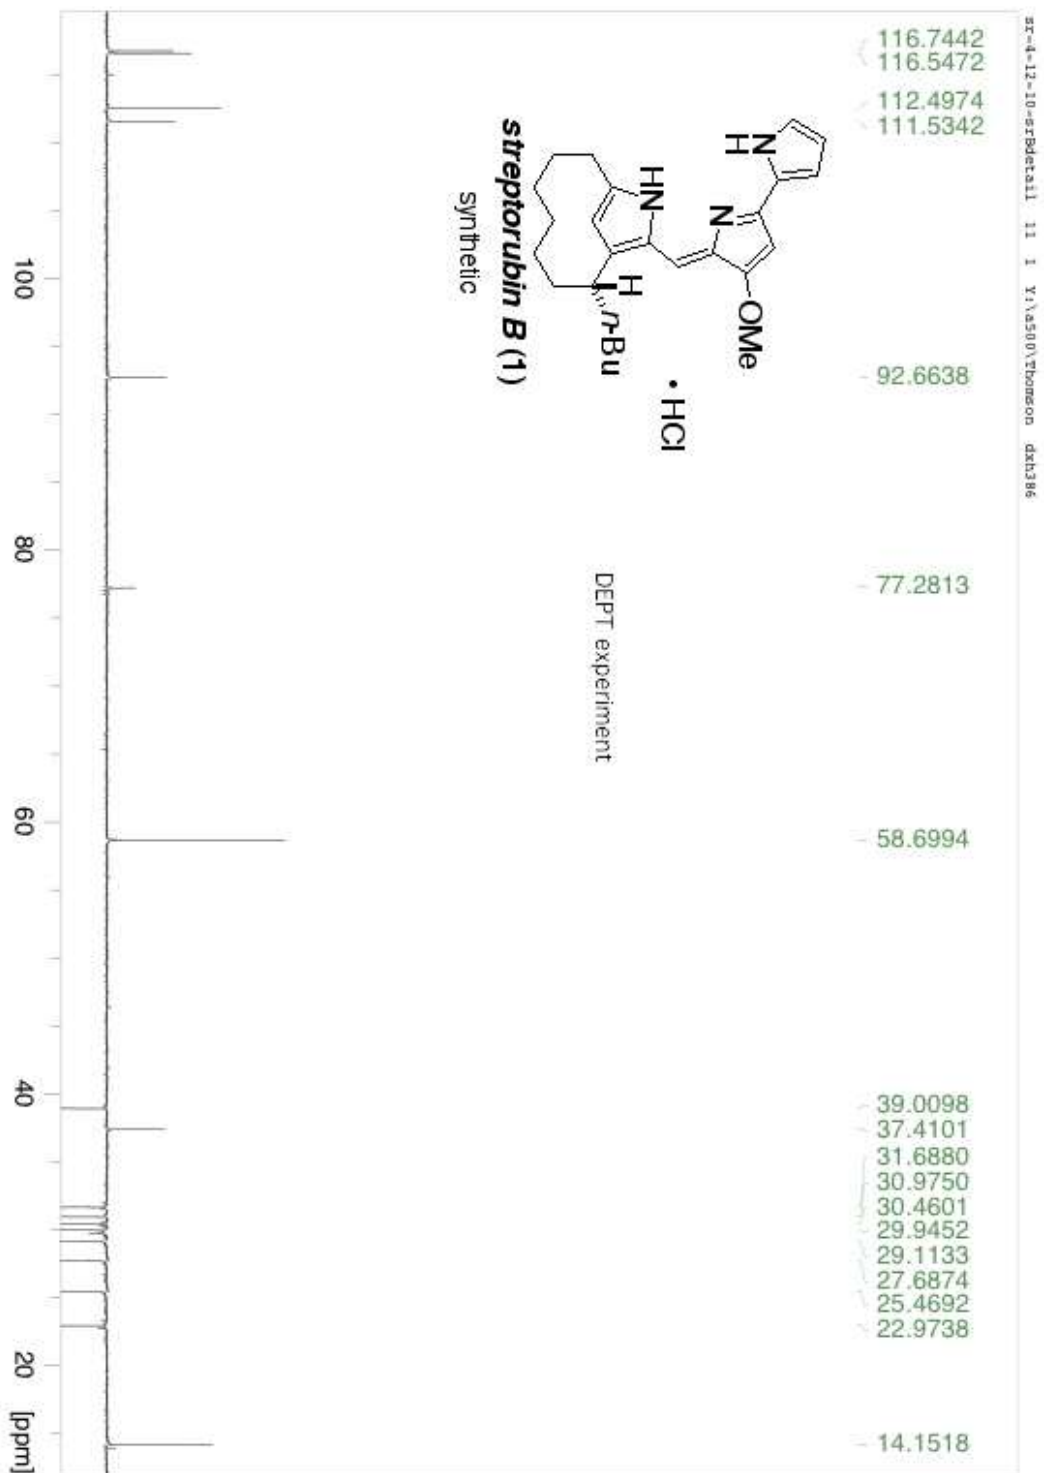

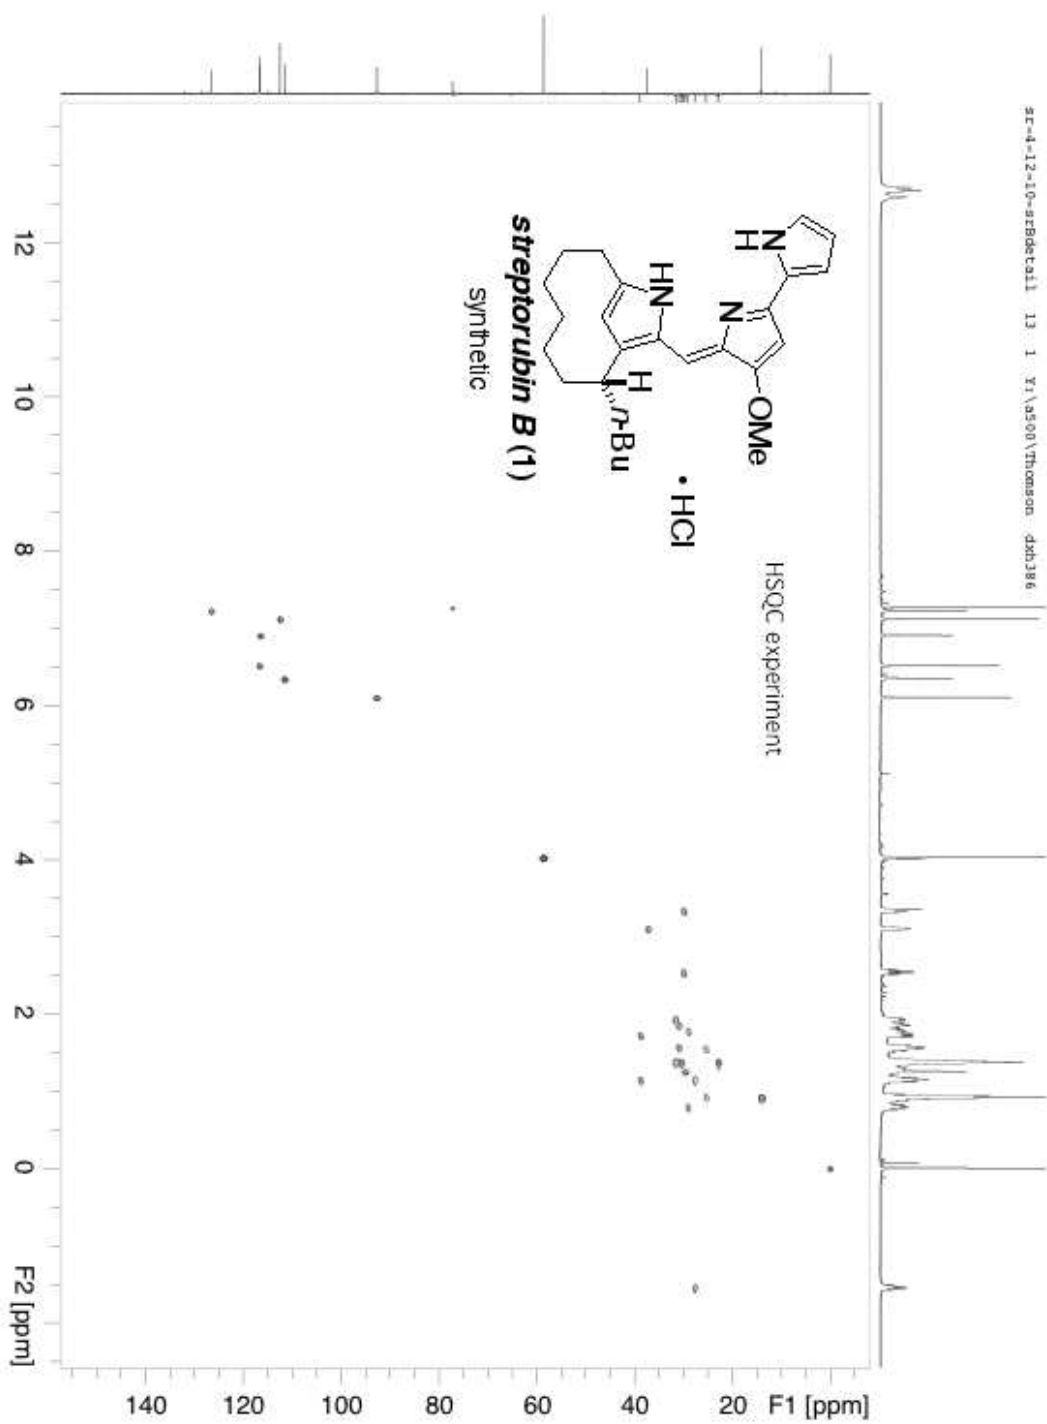



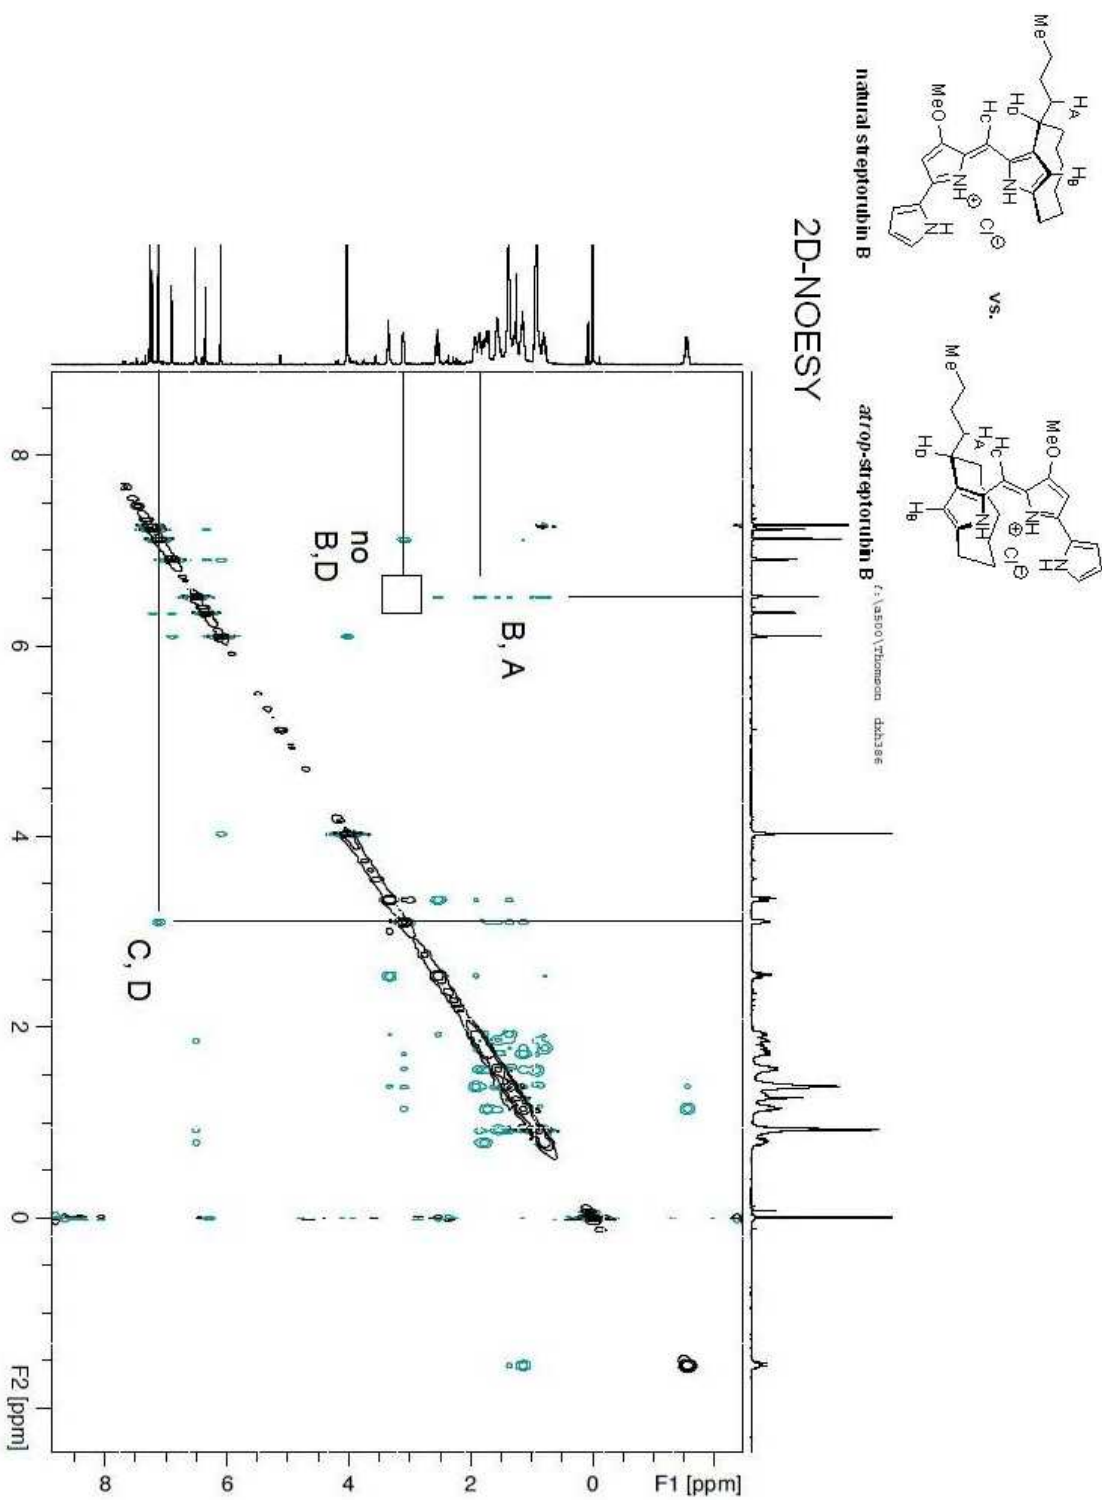

Supporting Information

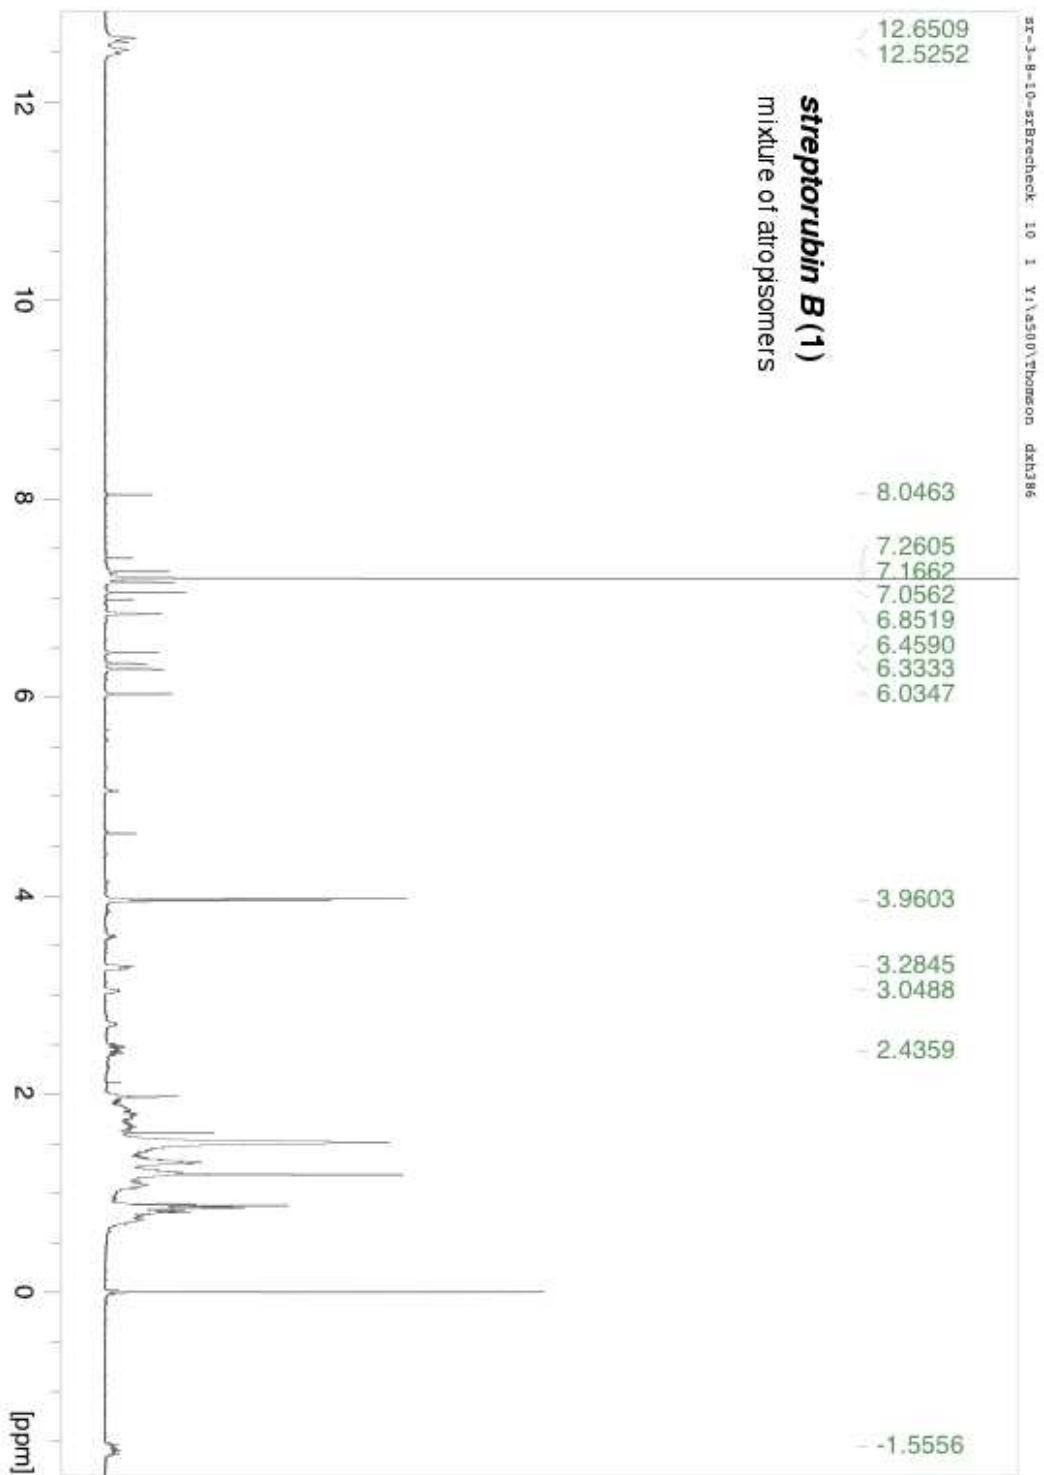

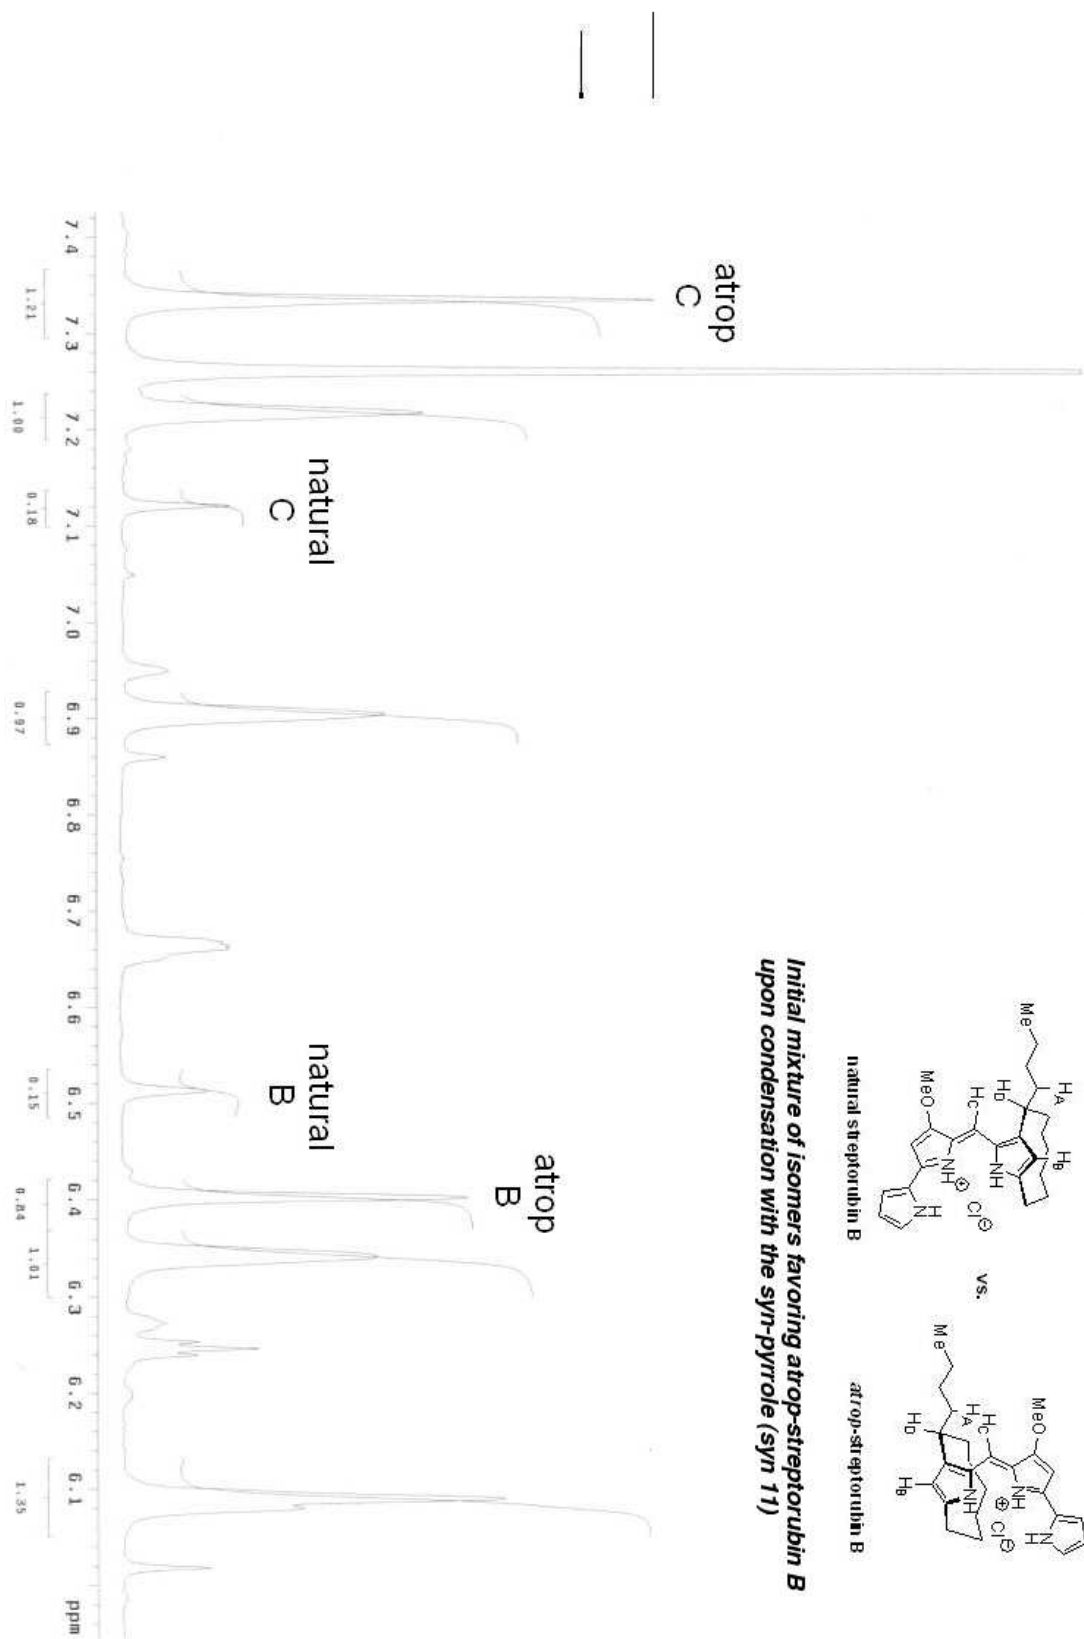

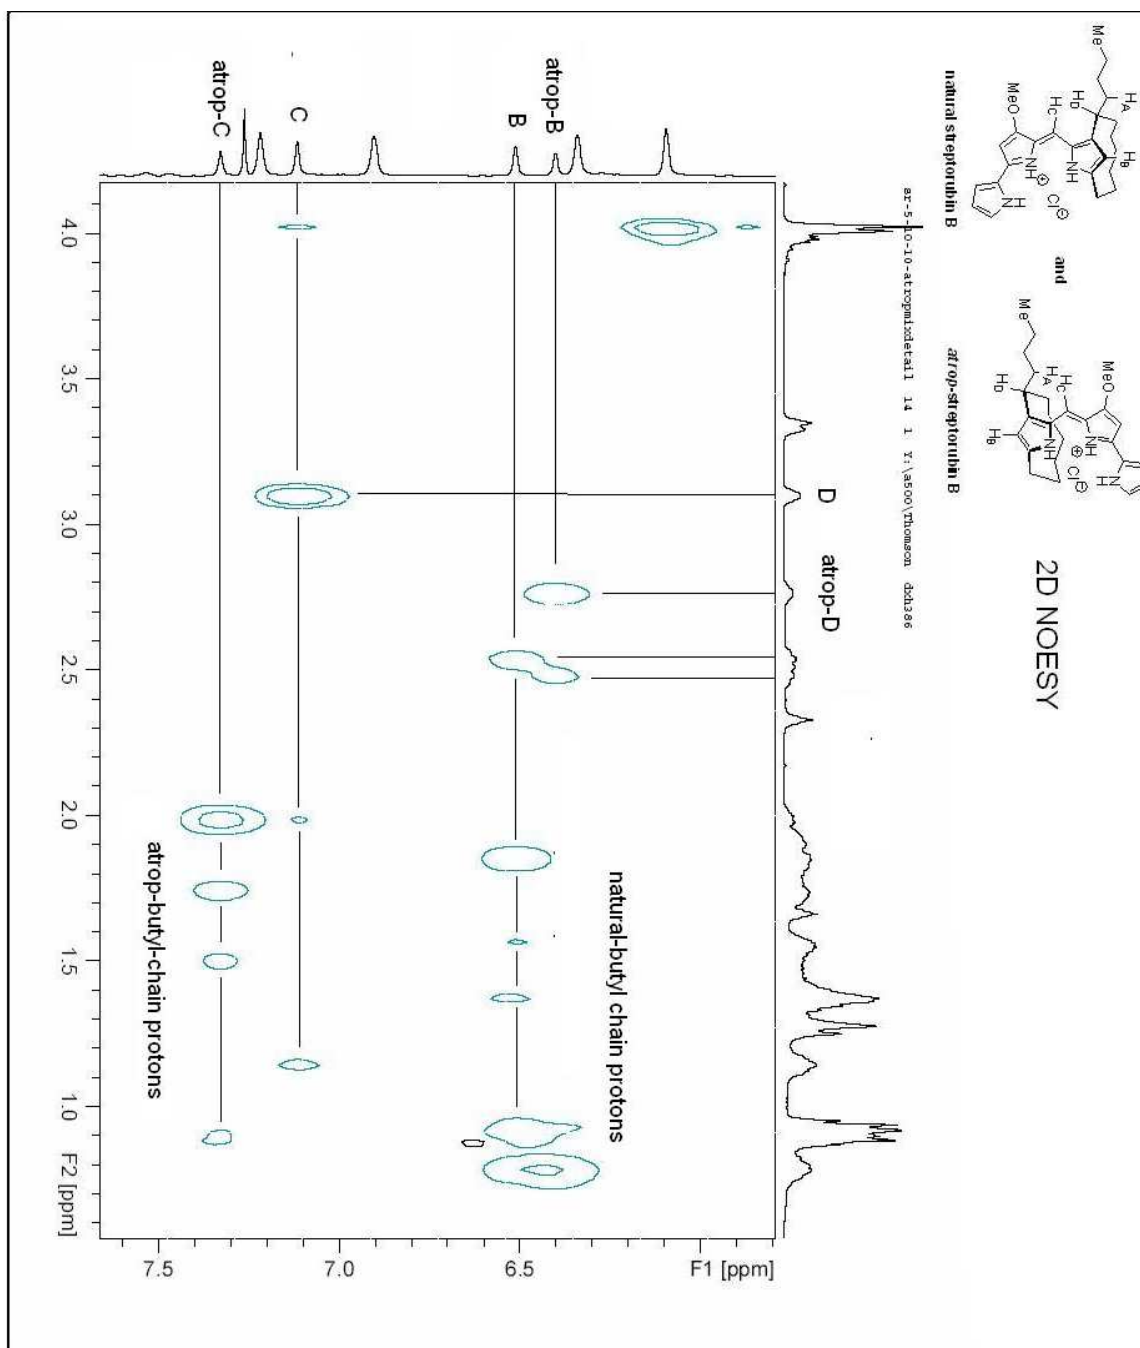

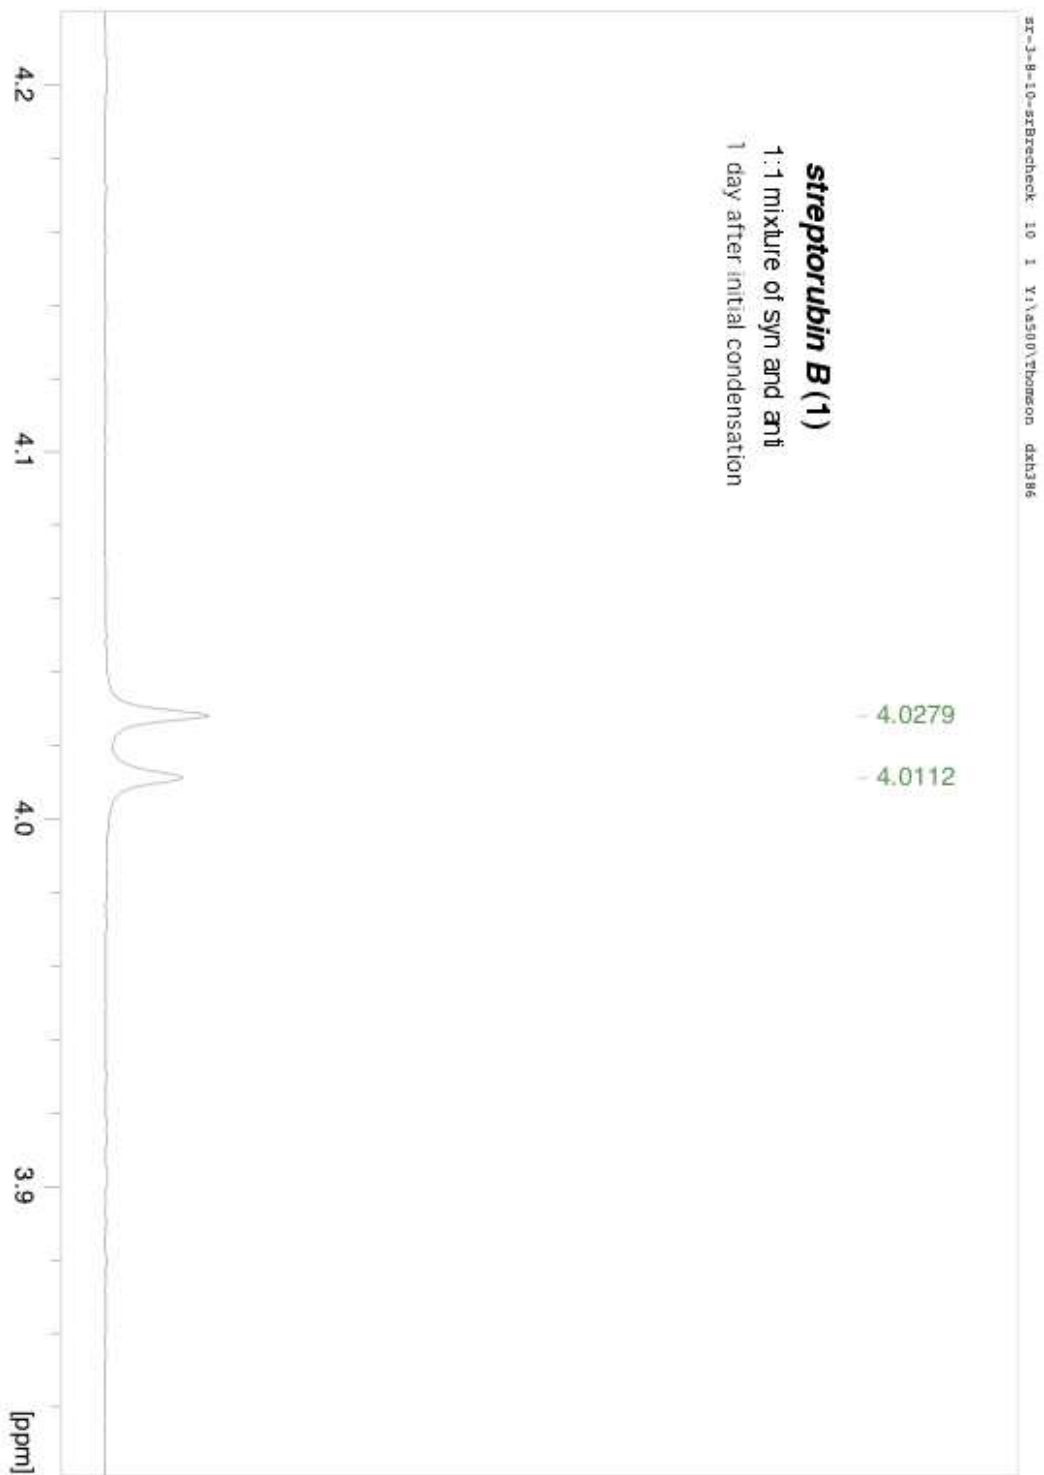

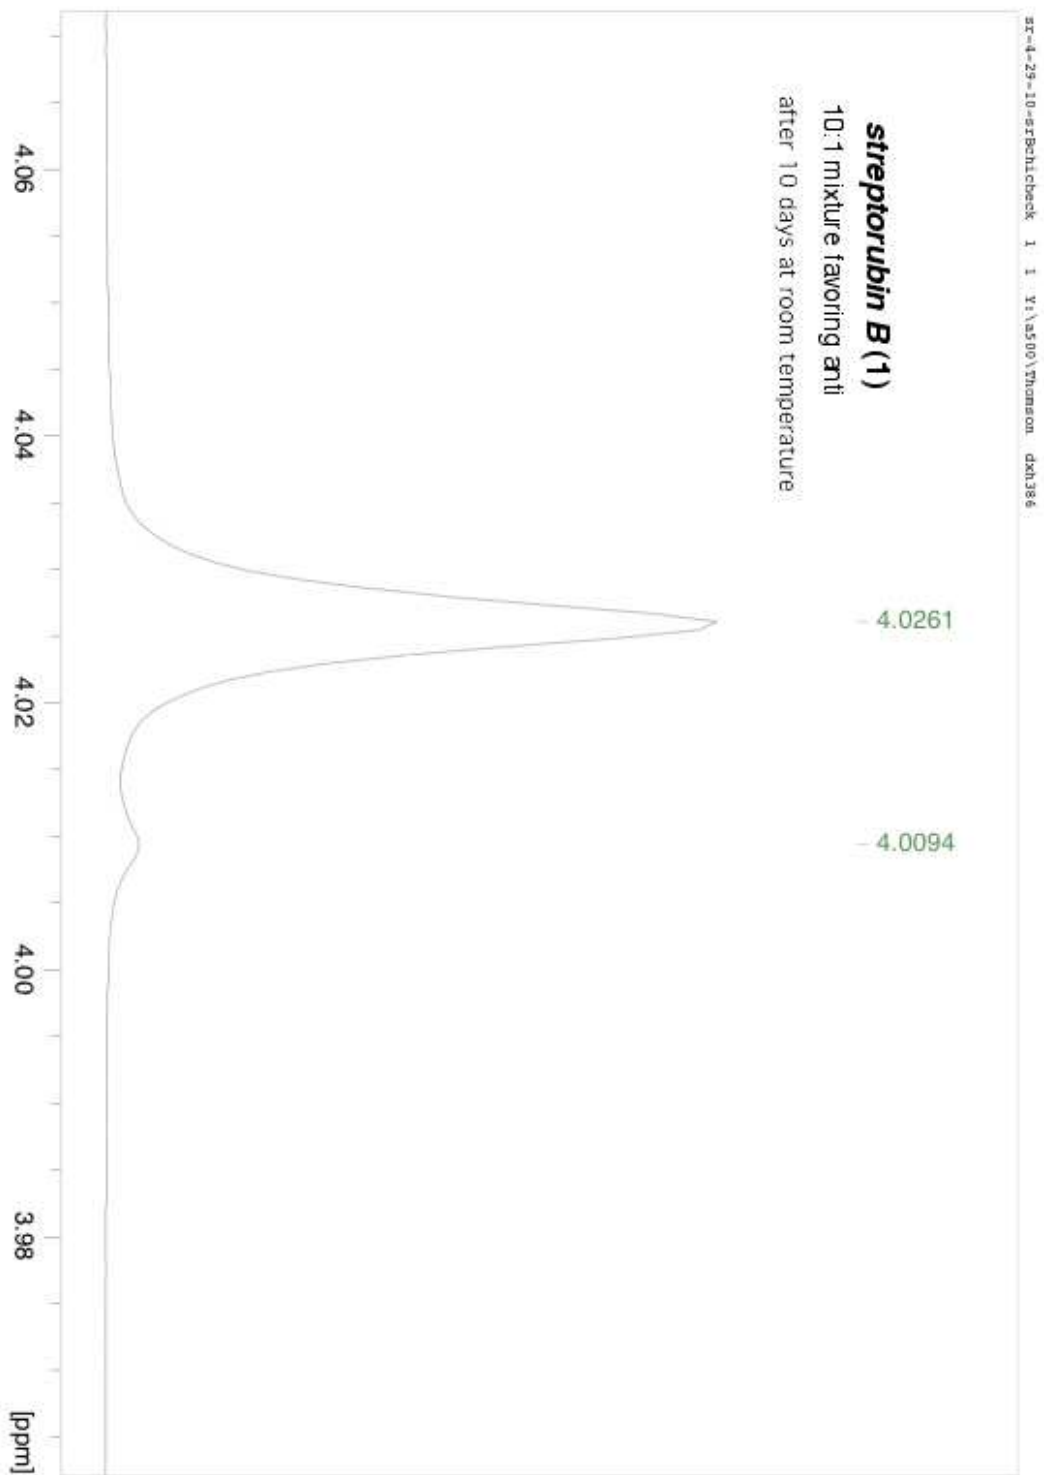

Supporting Information

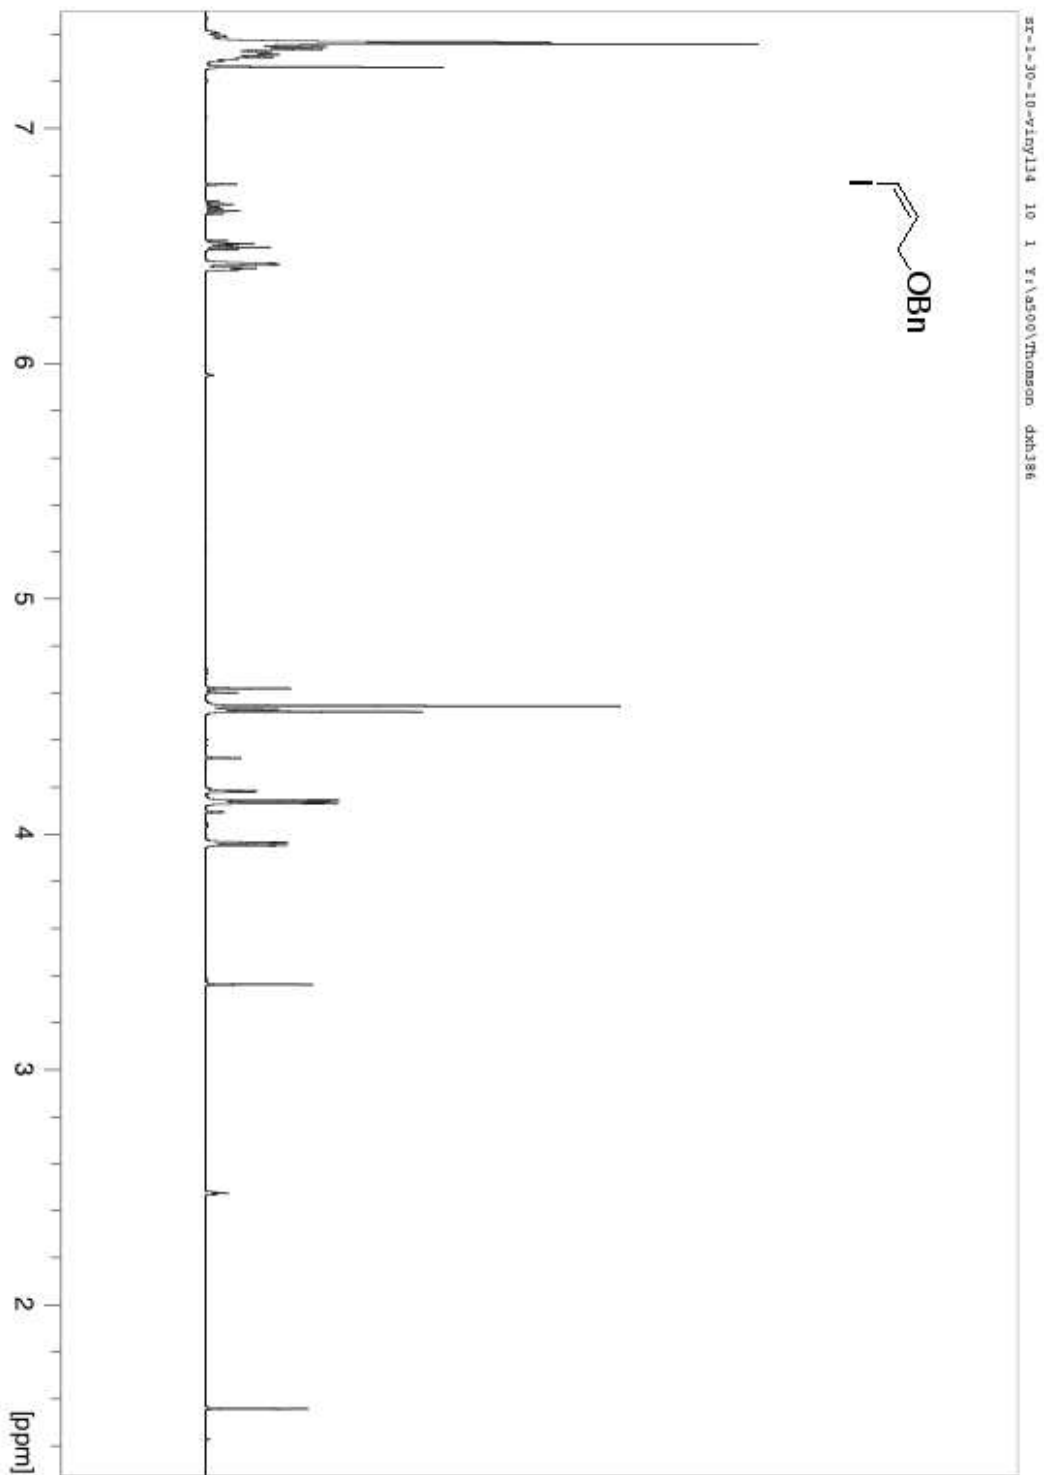

Supporting Information

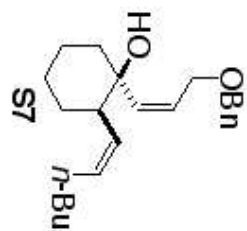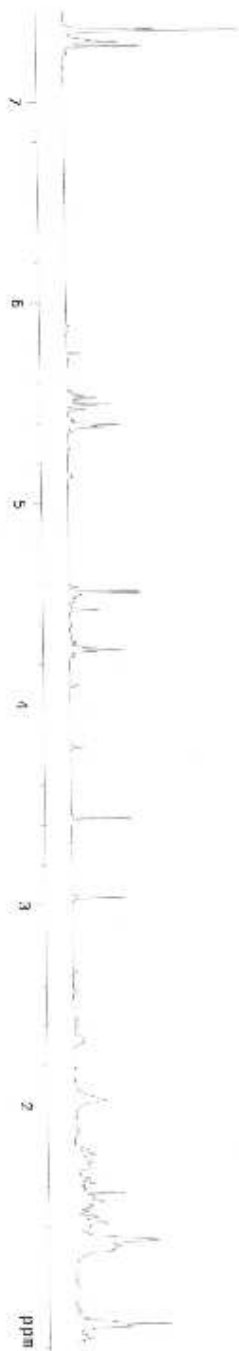



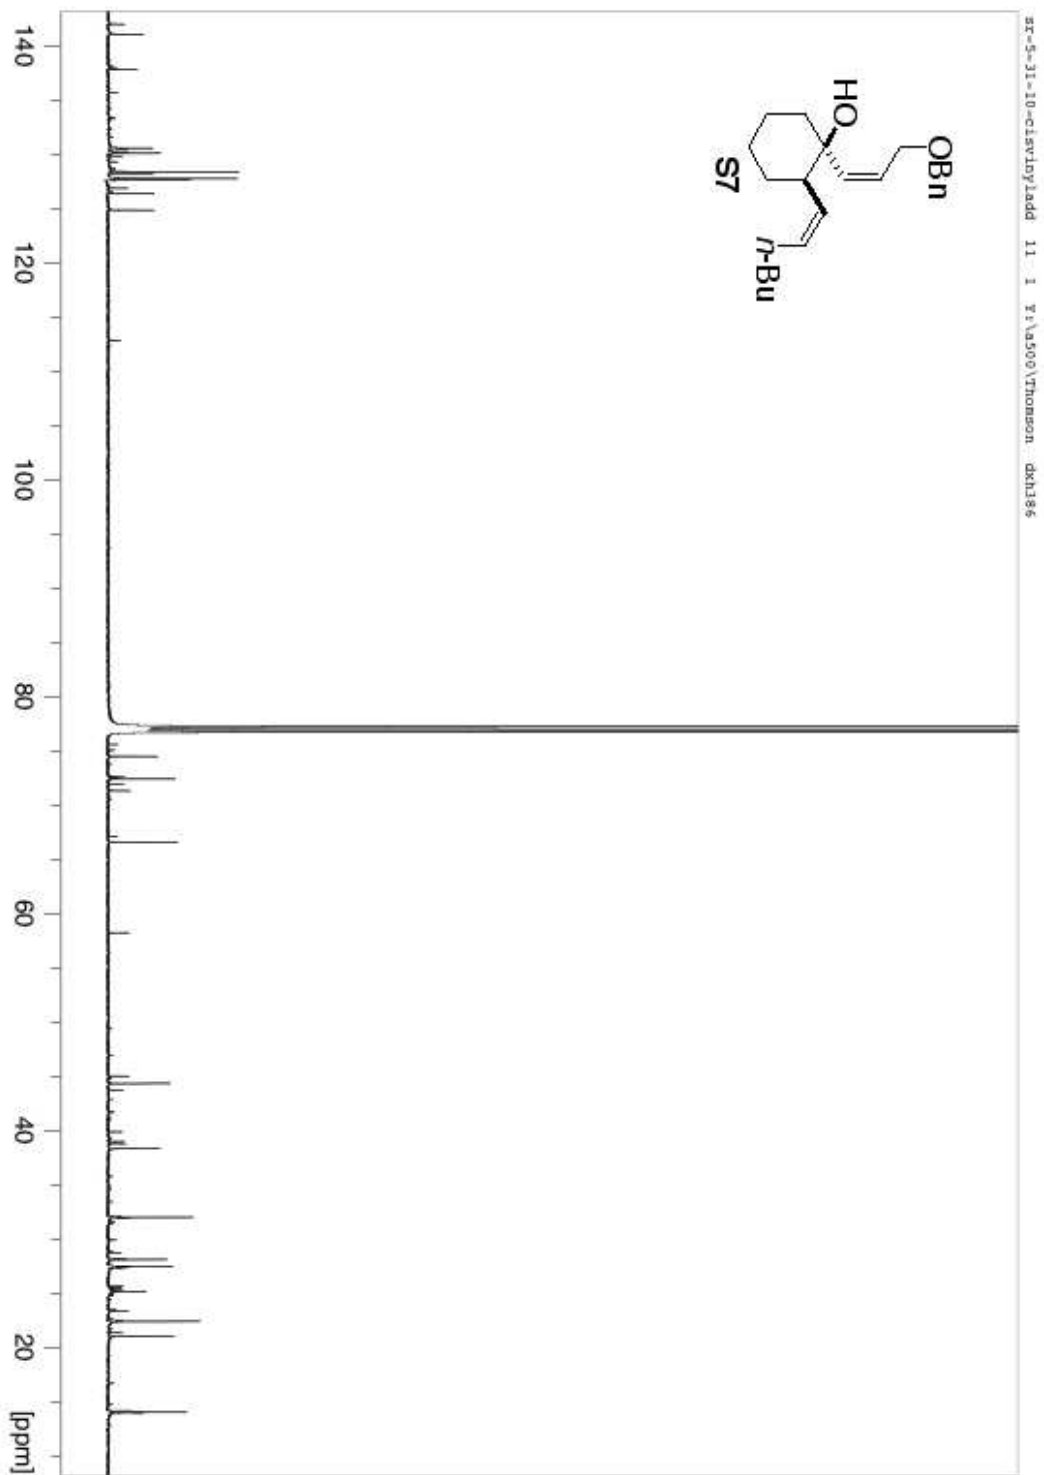

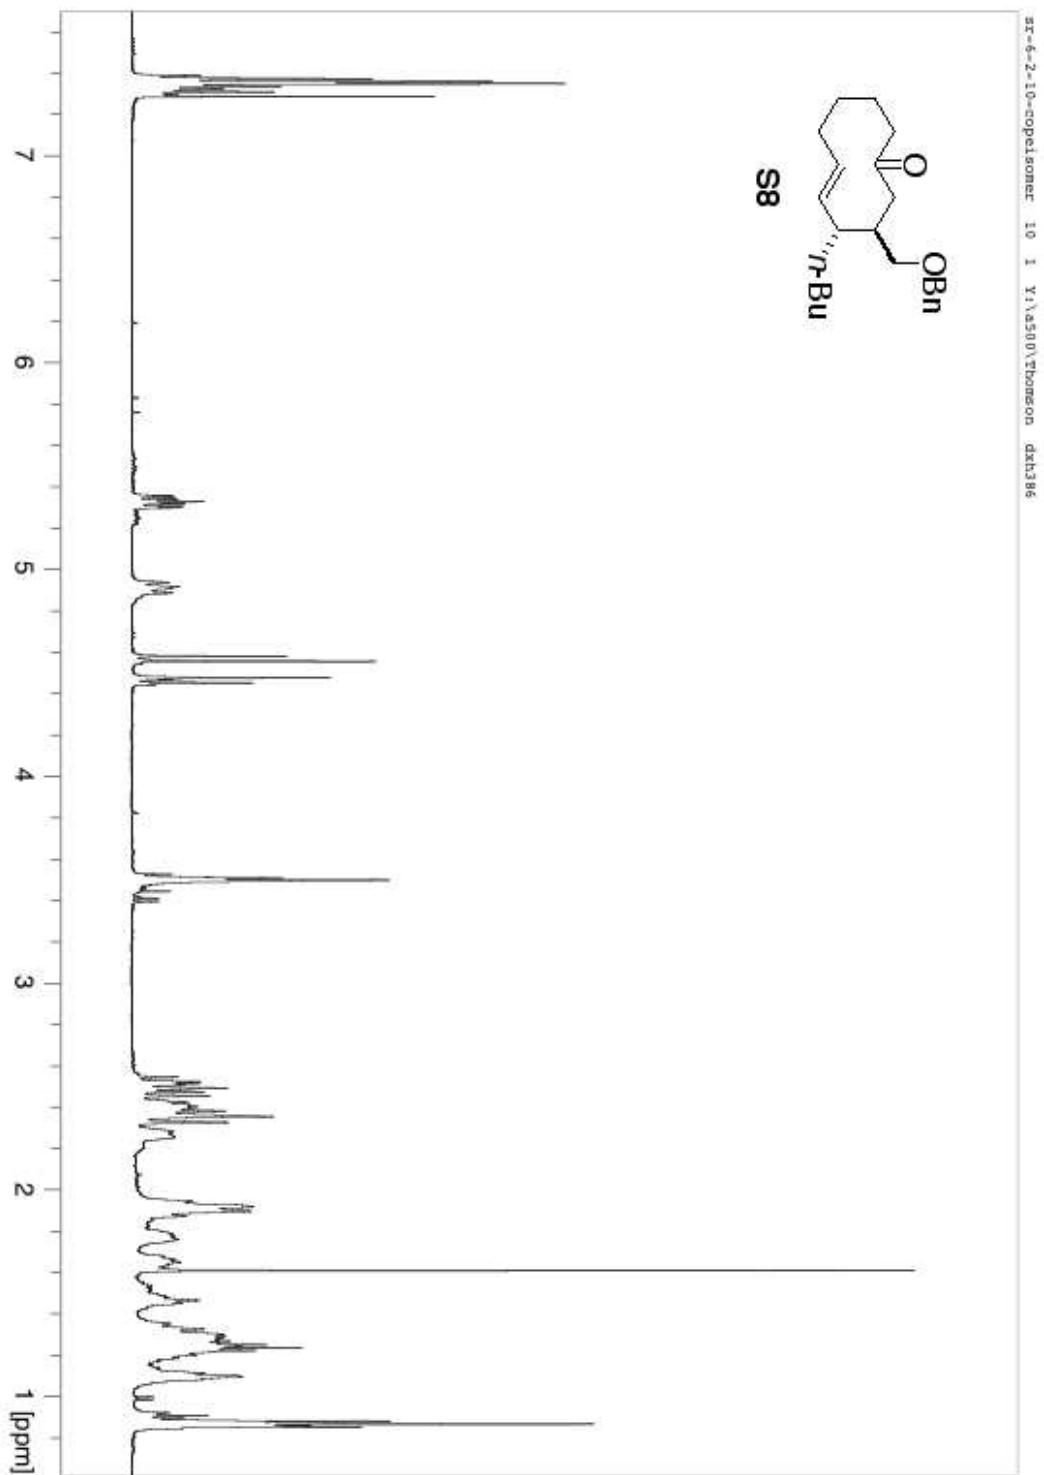

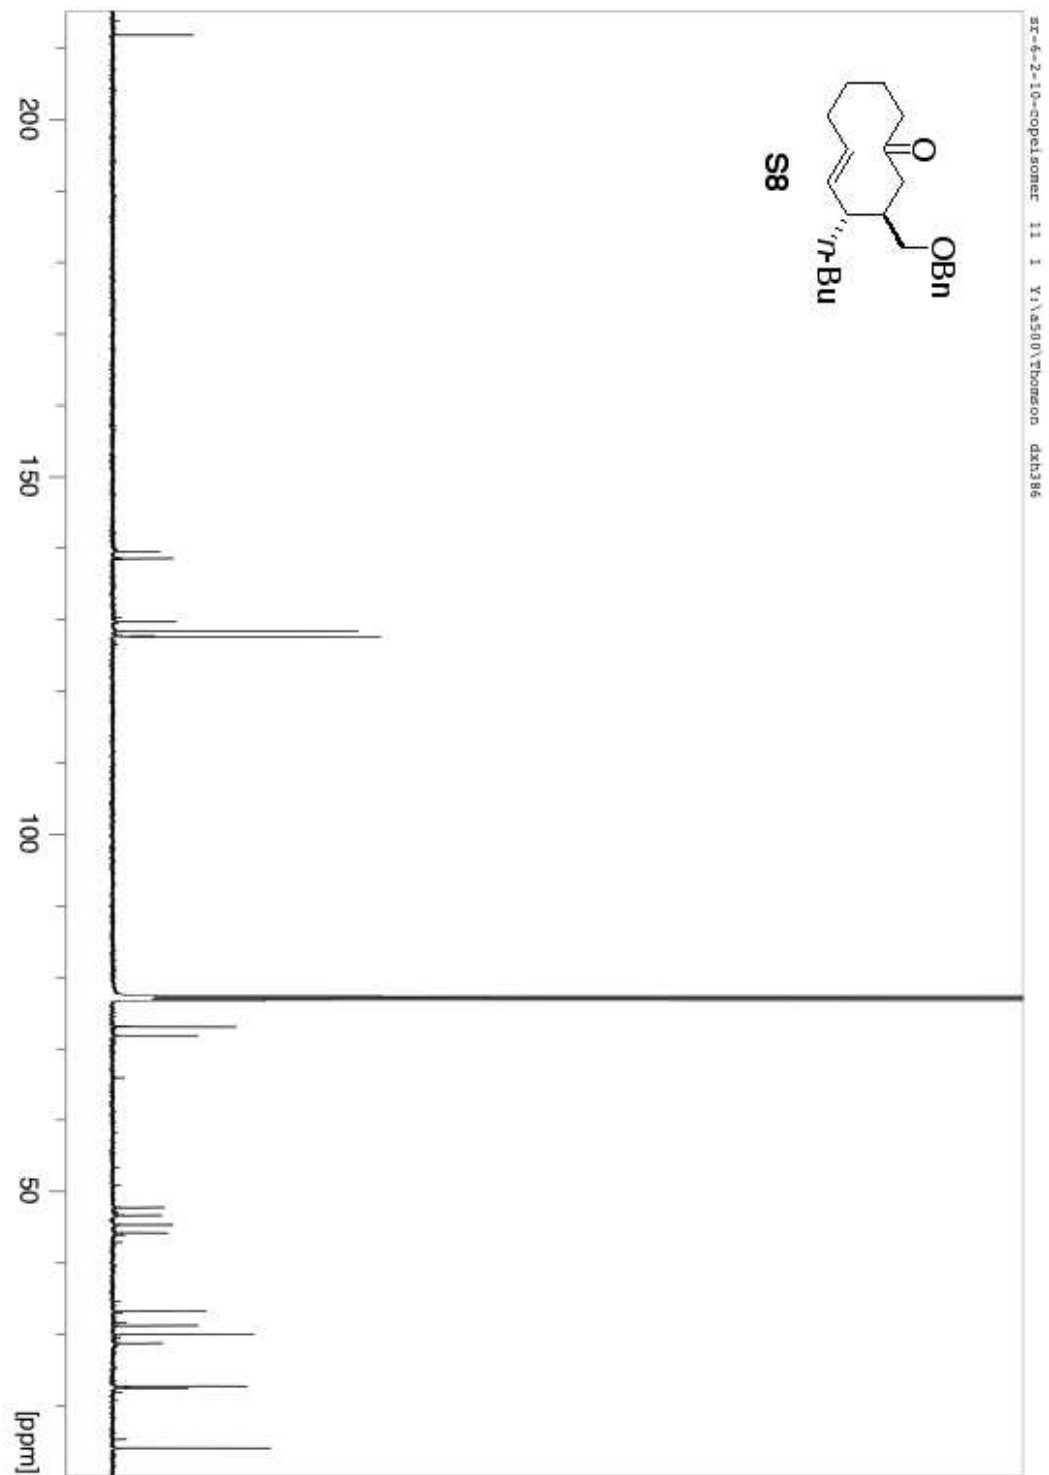

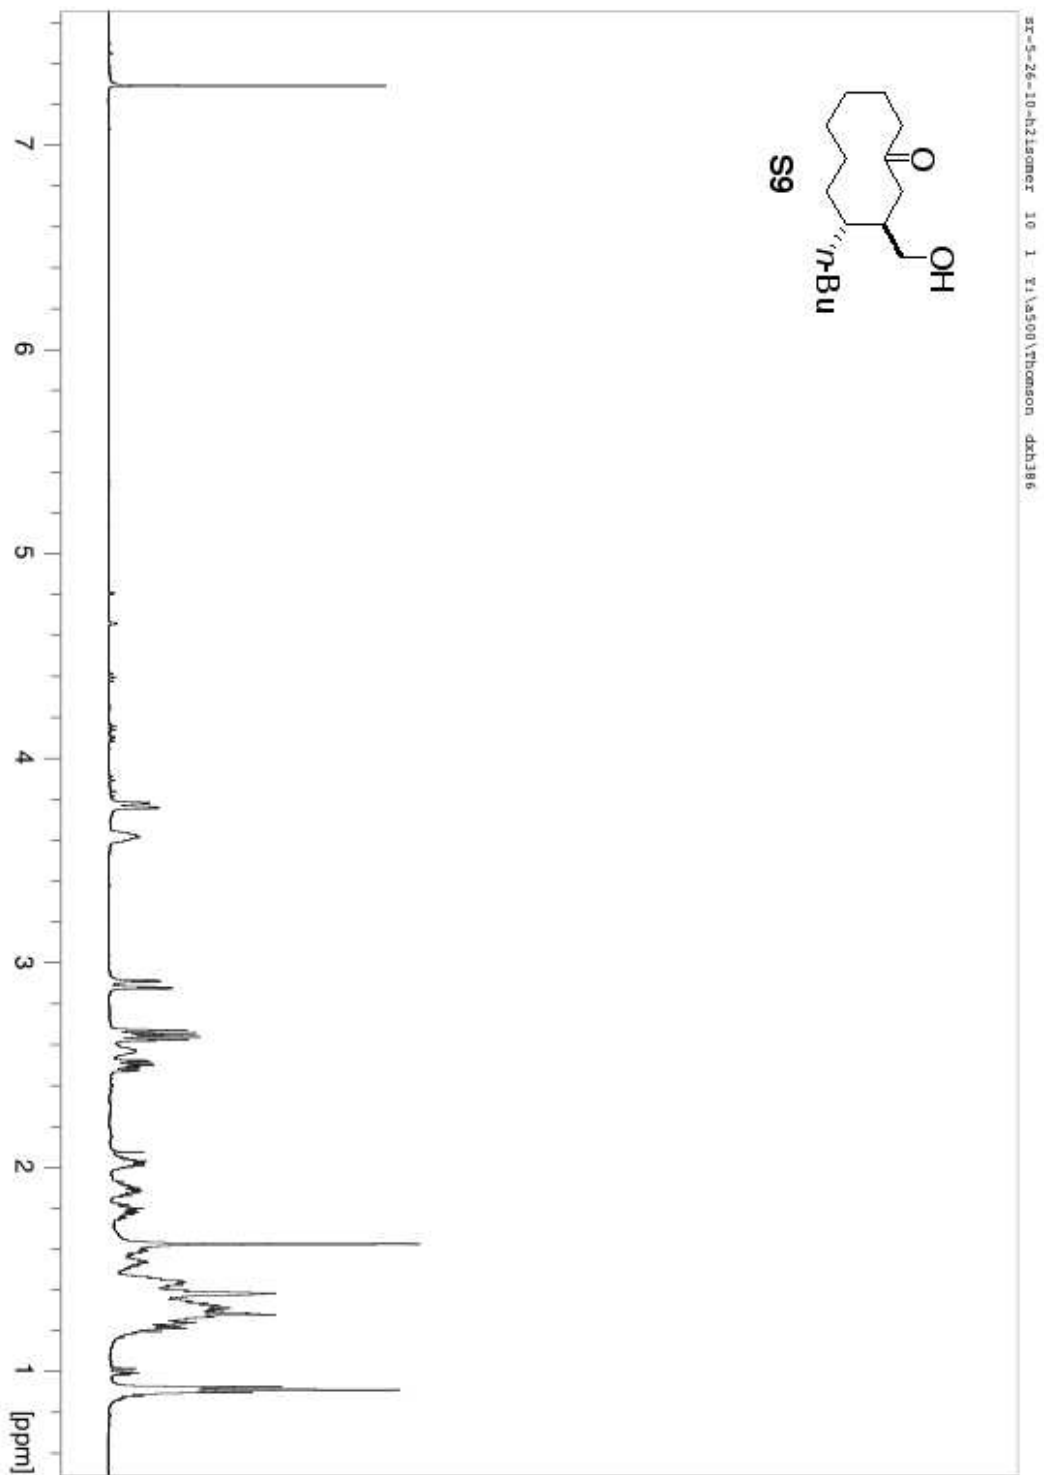

Supporting Information

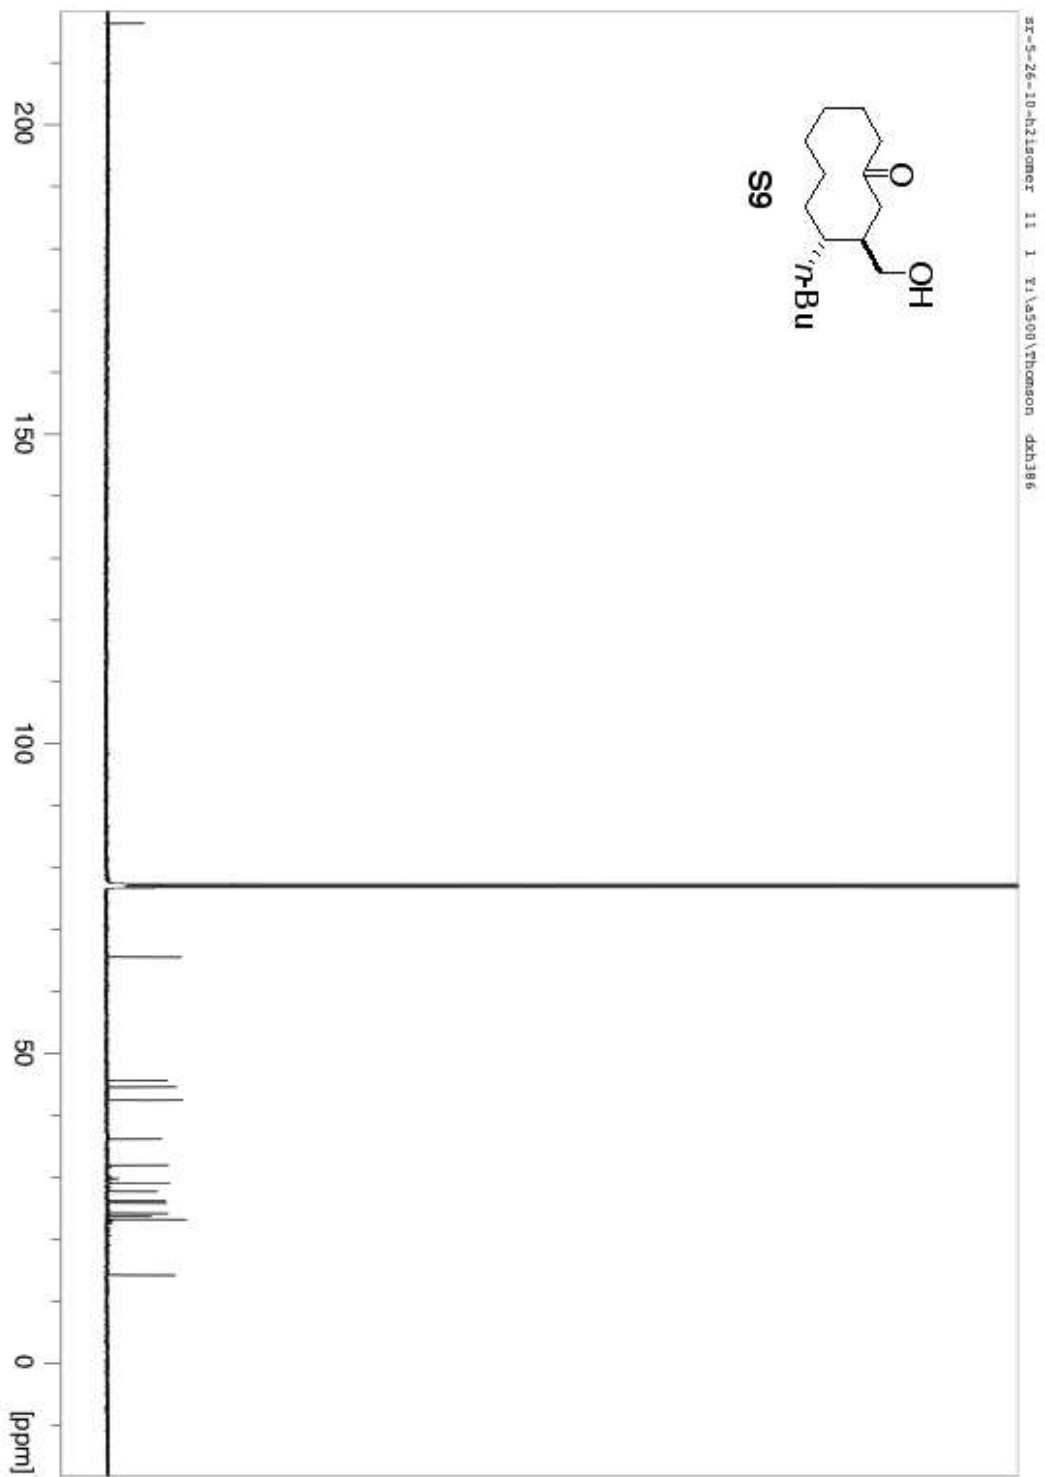

Supporting Information

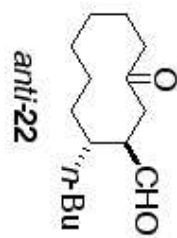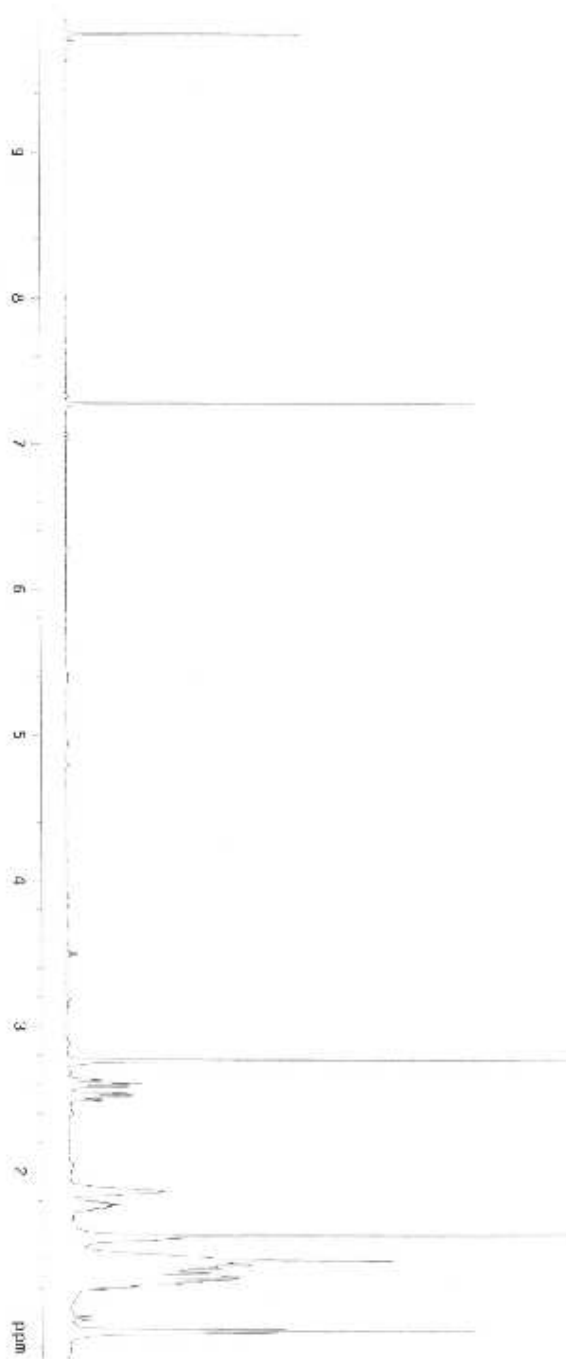

Brookly  
refine

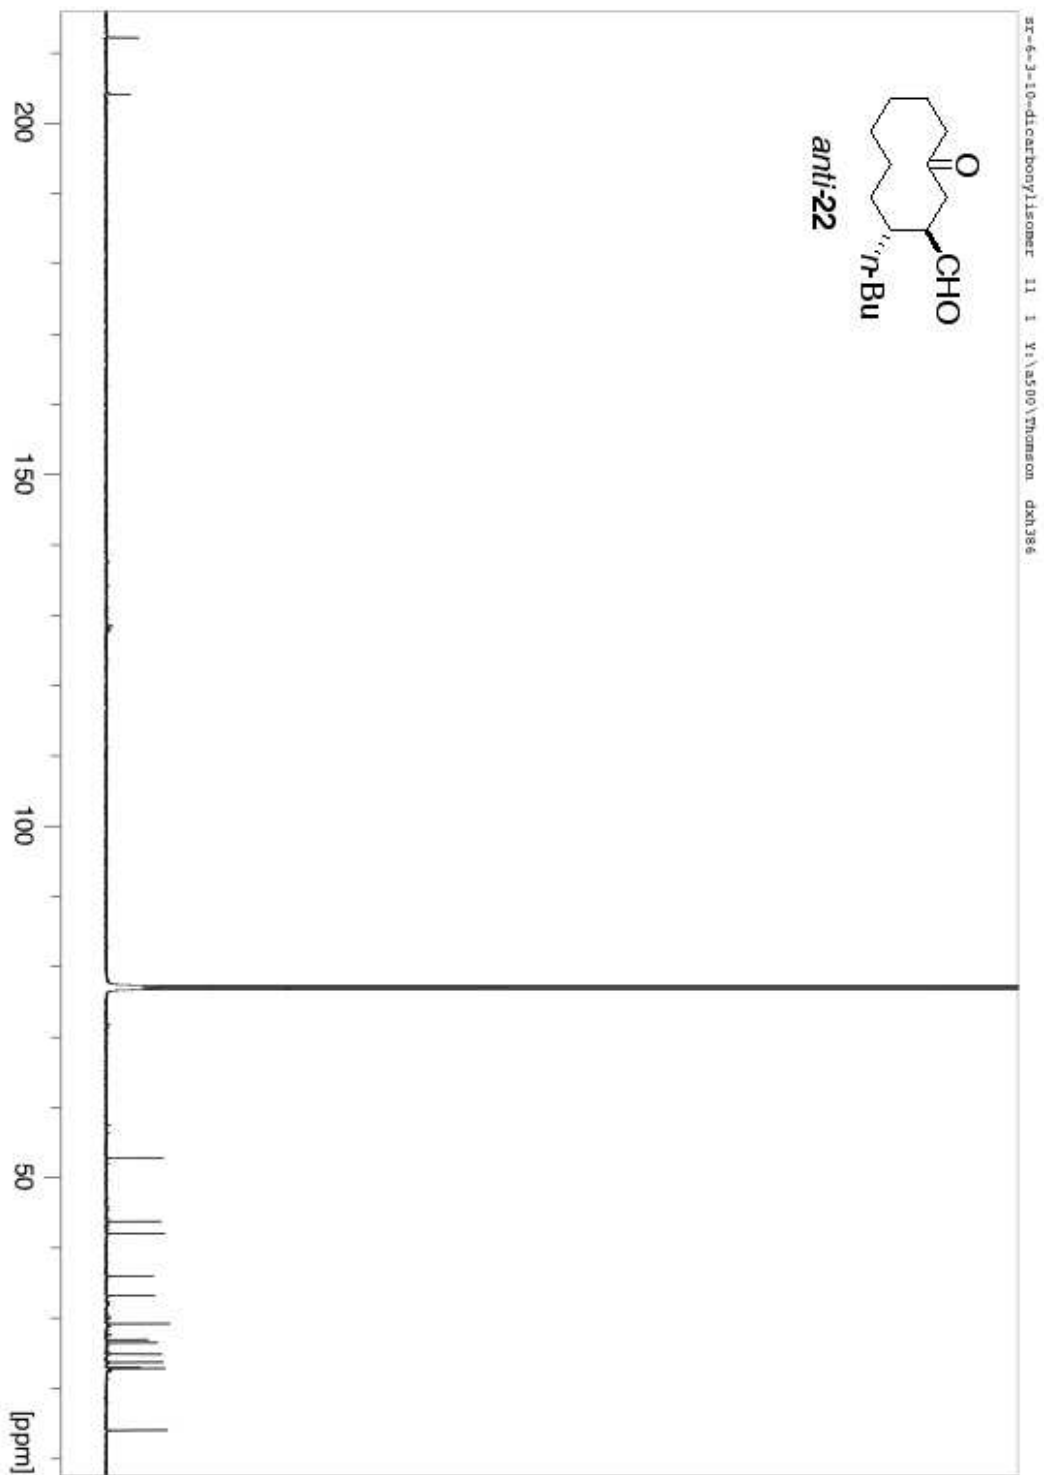

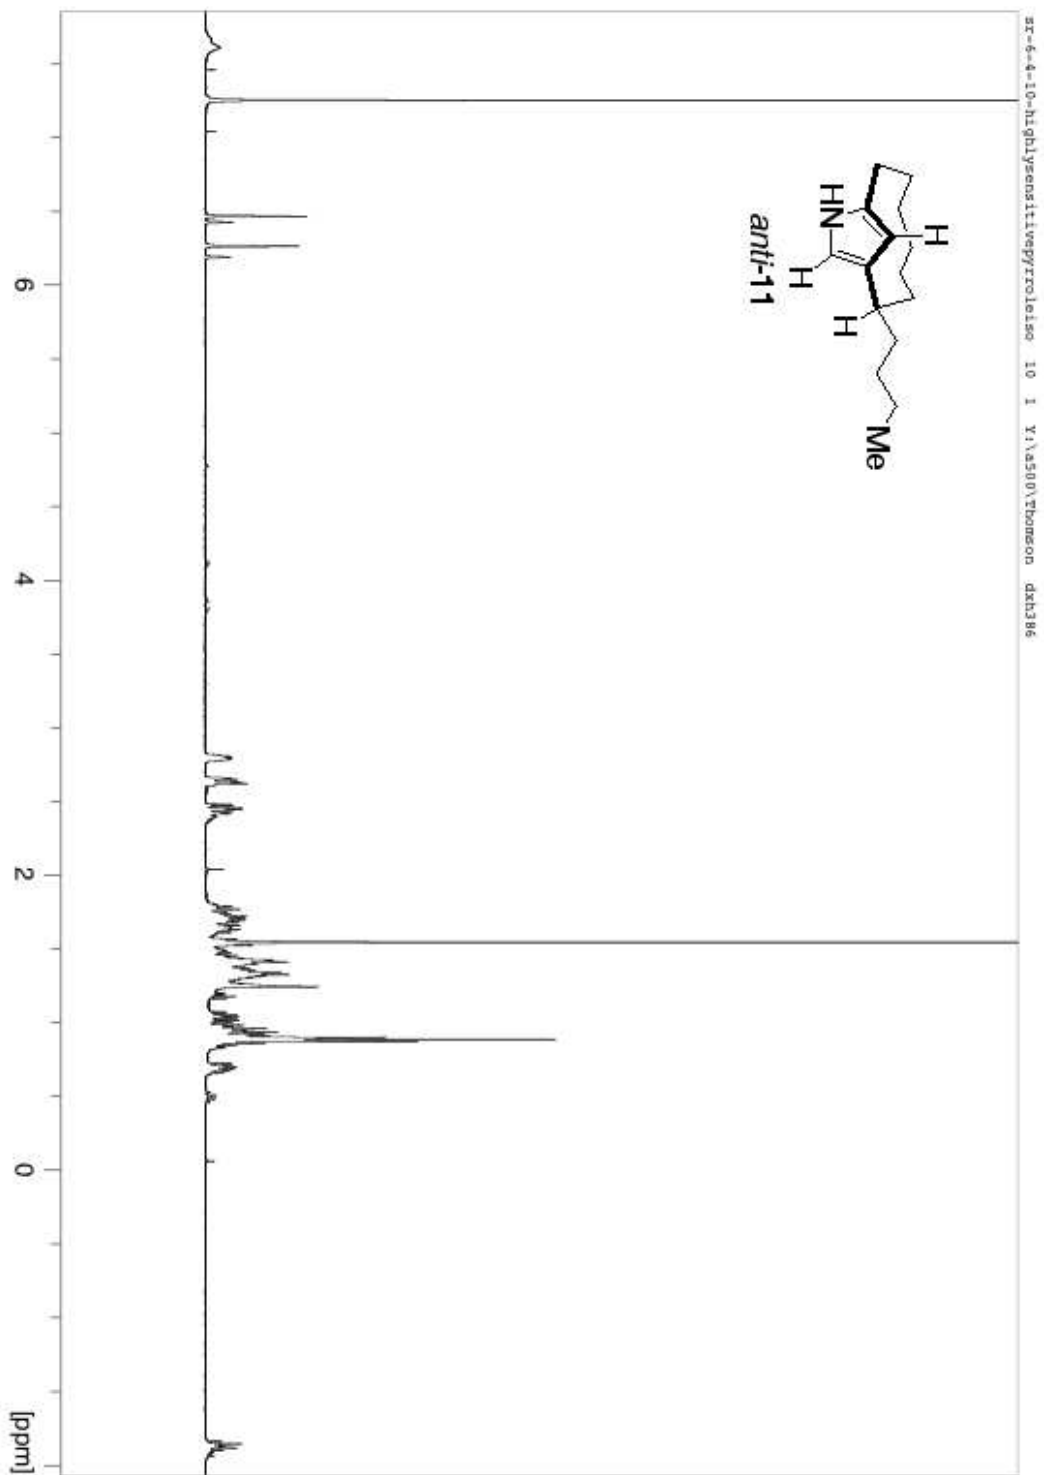



Supporting Information

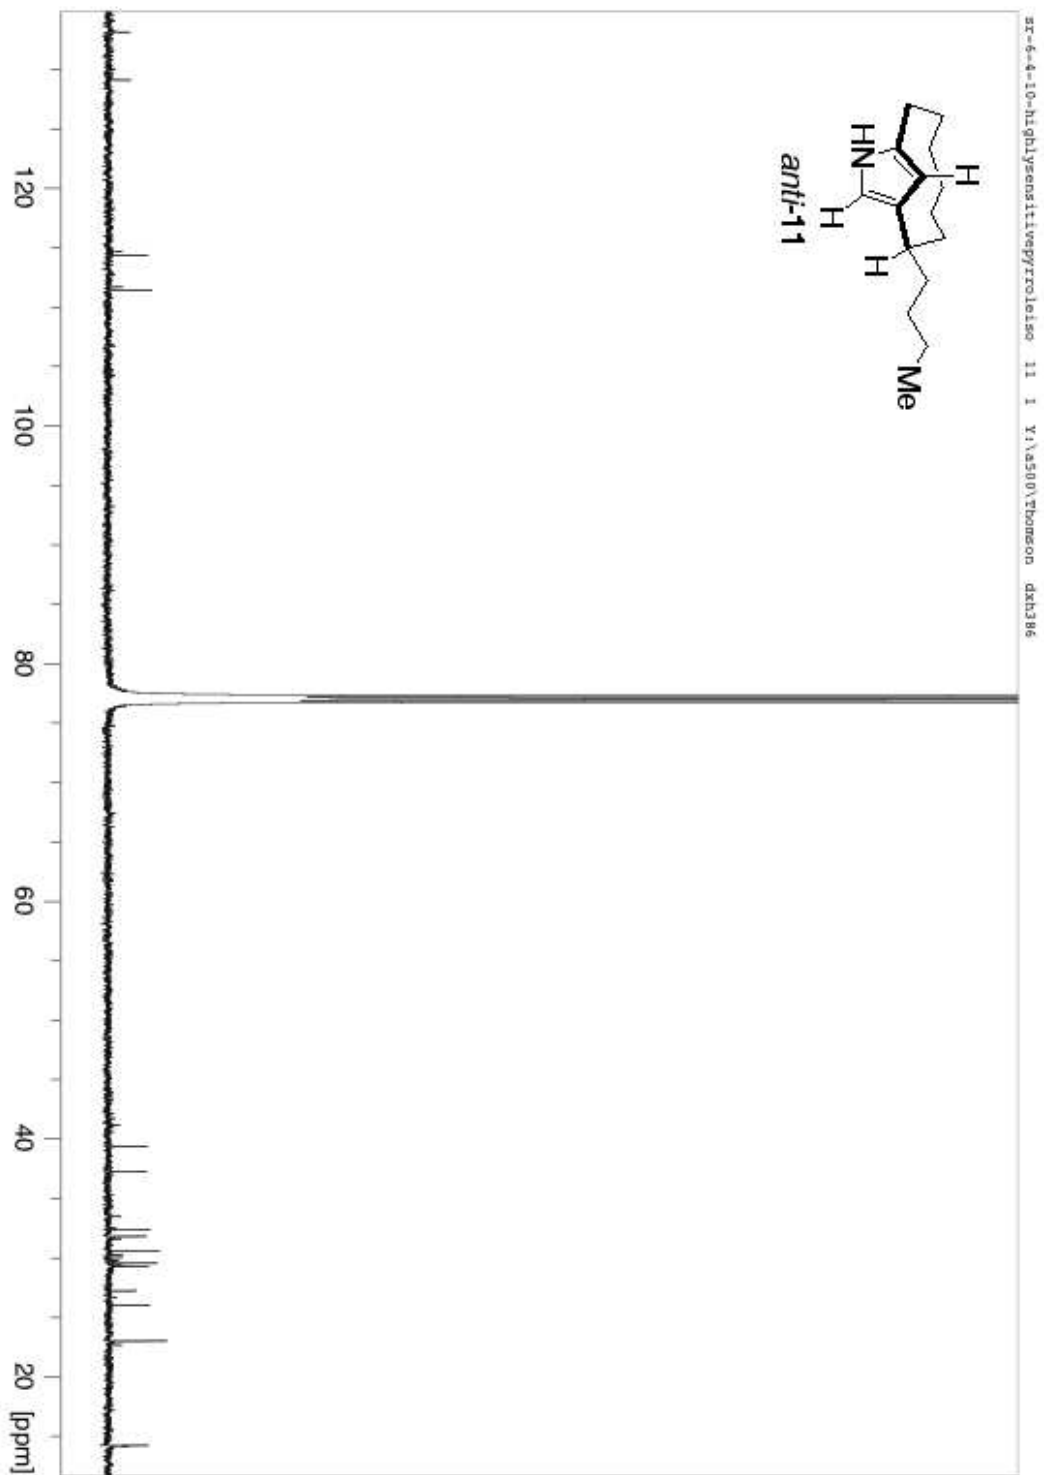

Supplement: NIHMS259596-supplement-1_si_001.pdf [file NIHMS259596-supplement-1_si_001.pdf]
